# Supplementary material for: Vaginal Microbiota of Adolescent Girls Prior to the Onset of Menarche Resemble Those of Reproductive-Age Women
Source: PubMed Central journal article supplement — mBio. 2015 Mar 24;6(2):e00097-15. doi: 10.1128/mBio.00097-15 (PMC4453513; doi:10.1128/mbio.00097-15), 2015-03-24

# Subject 101: Black, non-Hispanic, 10.7 y/o at enrollment

## Girl Vagina

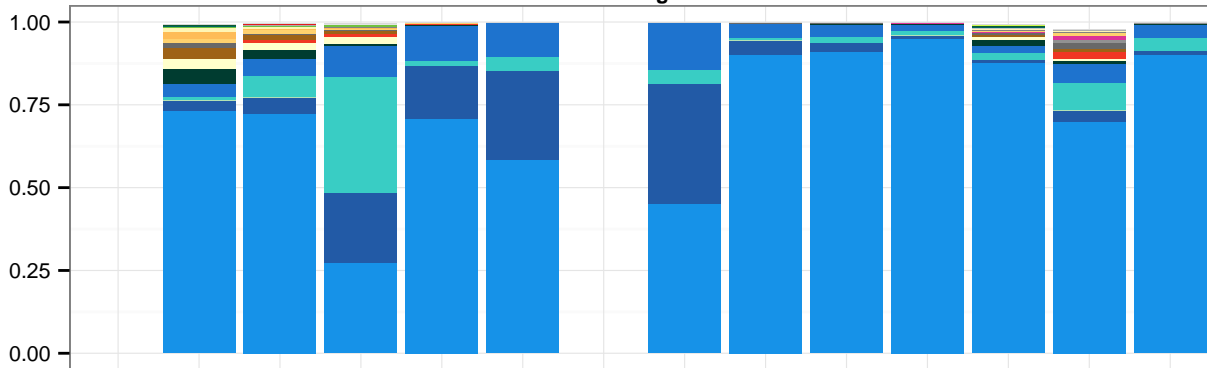

## Girl Vulva

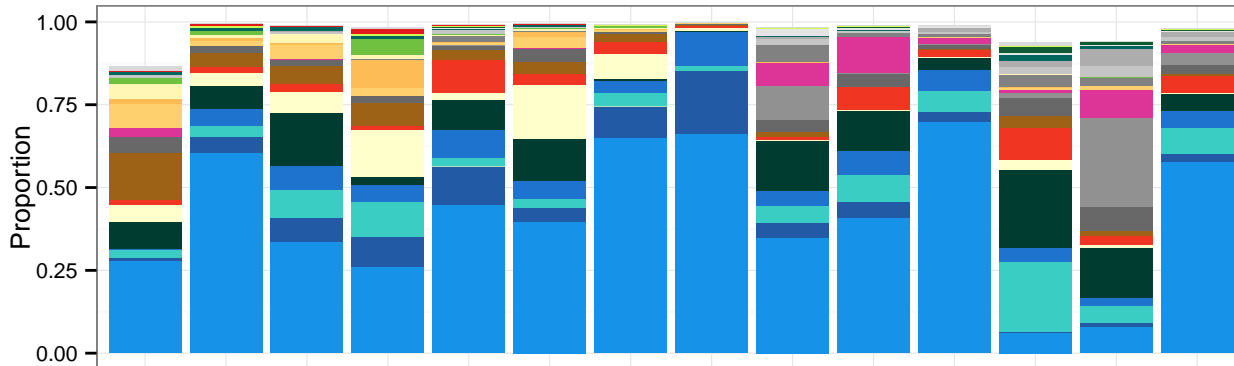

## Mother Vagina

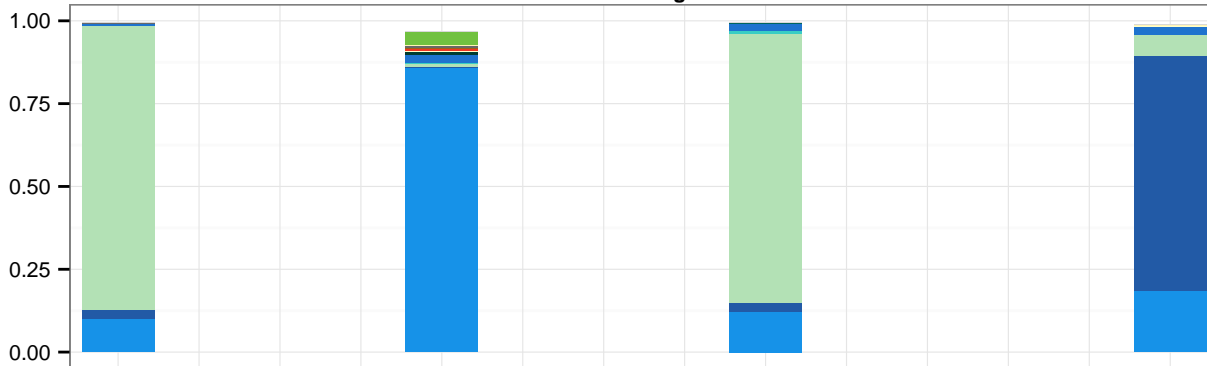

### Taxon

- Lactobacillus\_iners
- Lactobacillus\_jensenii
- Lactobacillus\_crispatus
- Lactobacillus\_gasseri
- Lactobacillus\_Other
- Prevotella
- Anaerococcus
- Finegoldia
- Peptoniphilus
- Other\_Bacteria
- Jonquetella
- Bifidobacterium
- Clostridiales
- Clostridiales\_Incertae\_Sedis\_XI
- Megaspheara
- Anaerospheara
- Corynebacterium
- Dialister
- Fusobacterium
- Porphyromonas
- Atopobium
- Segniliparus
- Actinomycetales
- Gallicola
- Campylobacter

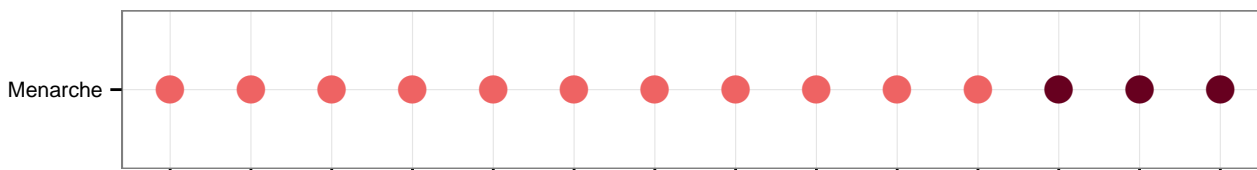

### Menarche status

- Pre
- Post

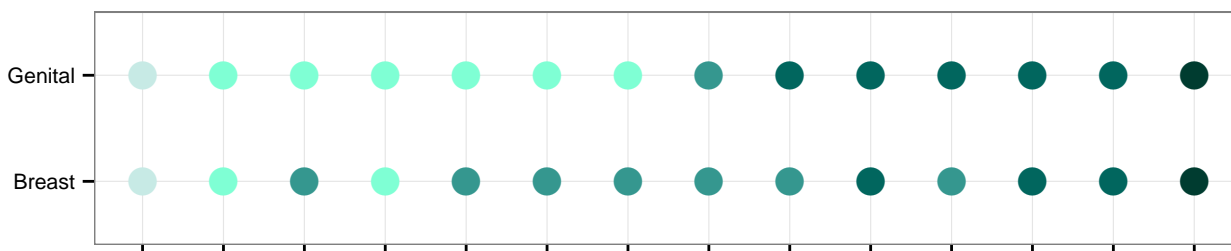

### Tanner stage

- 1
- 2
- 3
- 4
- 5

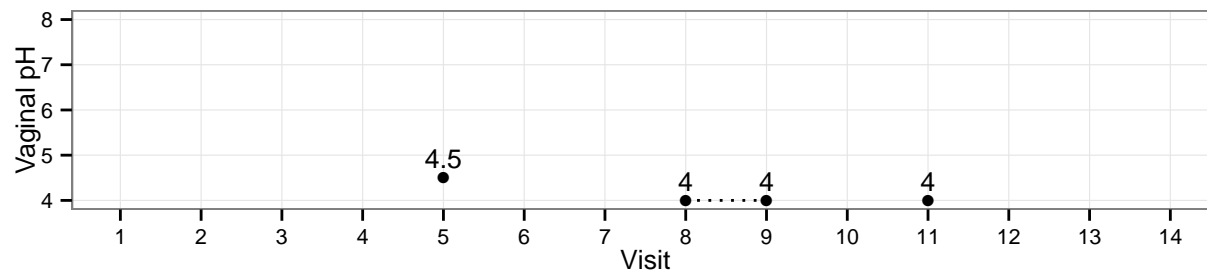

Visit

# Subject 102: Caucasian, non-Hispanic, 10.8 y/o at enrollment

## Girl Vagina

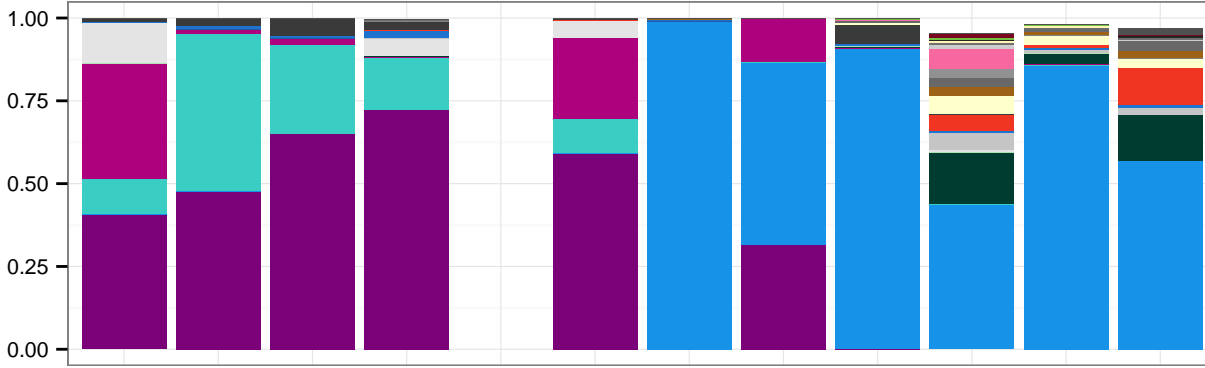

## Girl Vulva

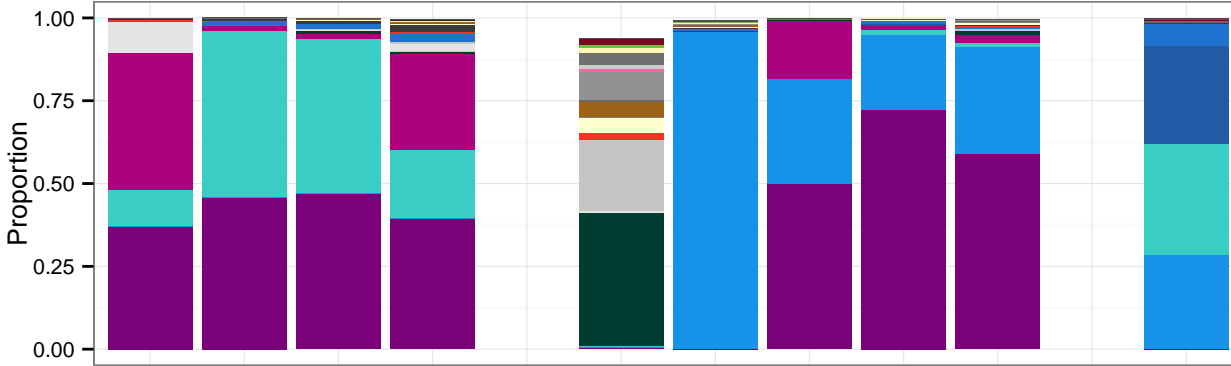

## Mother Vagina

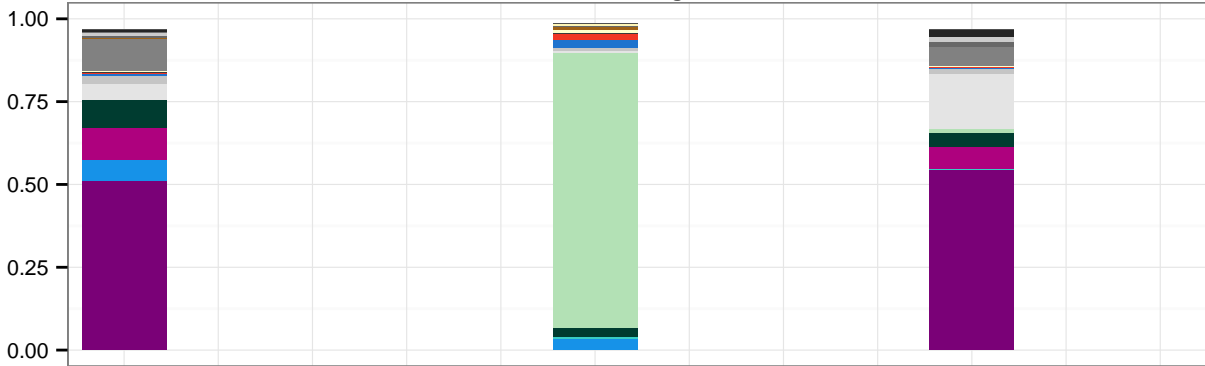

### Taxon

- Gardnerella\_vaginalis
- Lactobacillus\_iners
- Lactobacillus\_gasseri
- Gardnerella\_Other
- Prevotella
- Lactobacillus\_crispatus
- Atopobium
- Dialister
- Lactobacillus\_jensenii
- Lactobacillus\_Other
- Finegoldia
- Ureaplasma
- Anaerococcus
- Megasphaera
- Peptoniphilus
- Other\_Bacteria
- Jonquetella
- Alloscardovia
- Coriobacteriaceae
- Olsenella
- Anaerosphaera
- Veillonellaceae
- Corynebacterium
- Moryella
- Staphylococcus

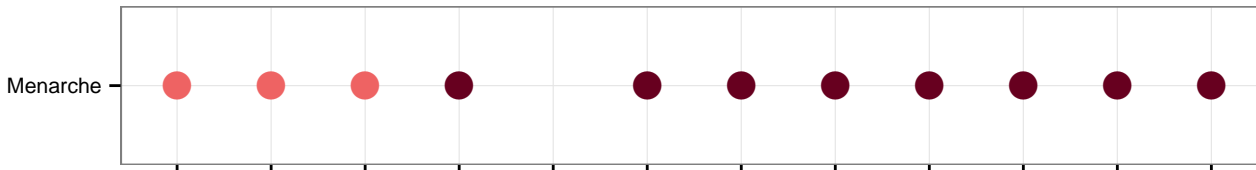

### Menarche status

- Pre
- Post

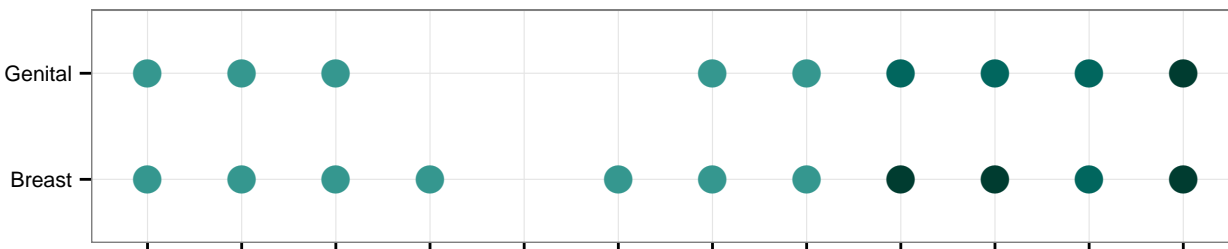

### Tanner stage

- 1
- 2
- 3
- 4
- 5

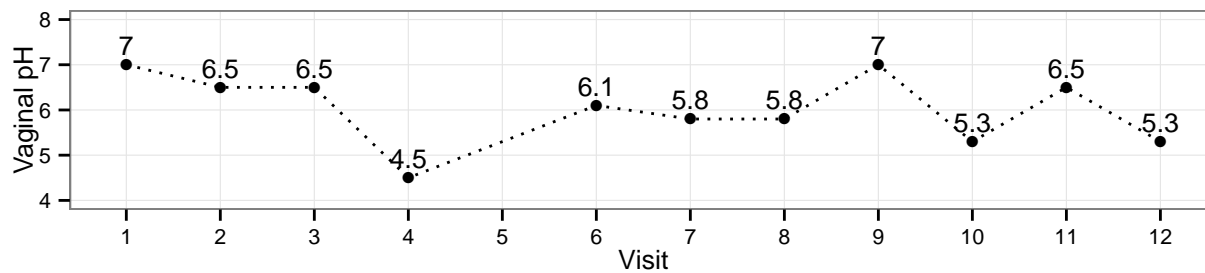

# Subject 103: Black, non-Hispanic, 10.7 y/o at enrollment

## Girl Vagina

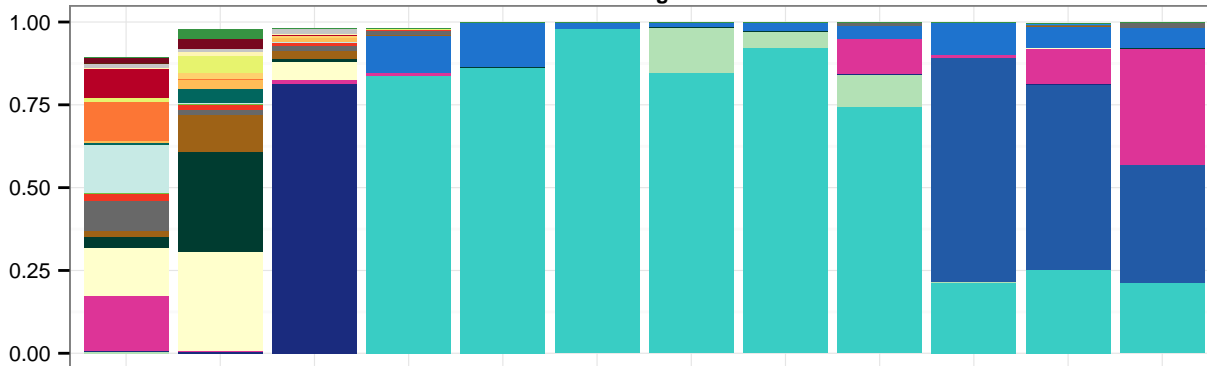

## Girl Vulva

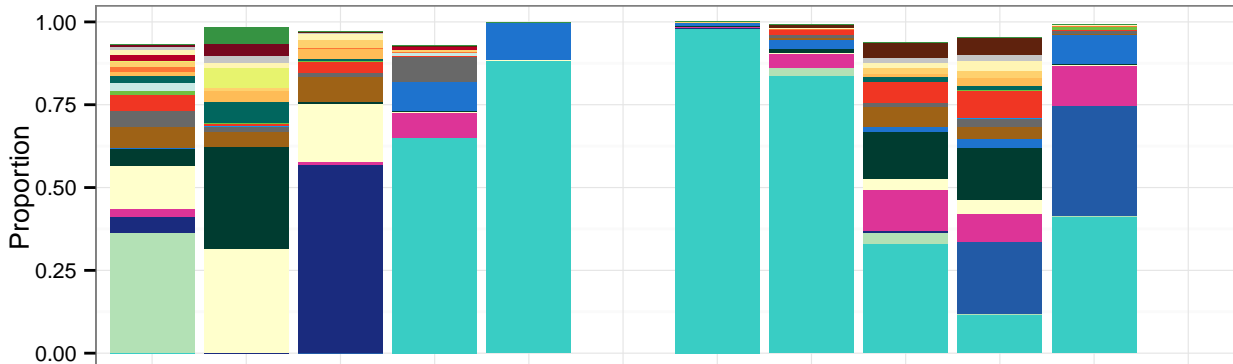

## Mother Vagina

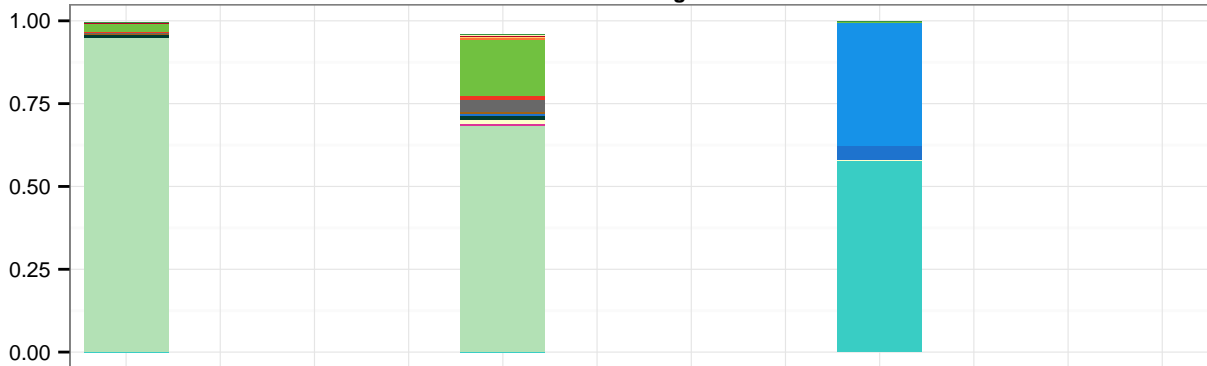

### Taxon

- Lactobacillus\_gasseri
- Lactobacillus\_crispatus
- Lactobacillus\_jensenii
- Streptococcus\_anginosus
- Bifidobacterium
- Anaerococcus
- Prevotella
- Lactobacillus\_Other
- Peptoniphilus
- Other\_Bacteria
- Lactobacillus\_iners
- Finegoldia
- Corynebacterium
- Bacteroides
- Porphyromonas
- Clostridiales\_Incertae\_Sedis\_XI
- Faecalibacterium
- Clostridiales
- Actinomyces
- Lachnospiraceae\_incertae\_sedis
- Anaerosphaera
- Dialister
- Murdochiella
- Moryella
- Mobiluncus

Menarche

### Menarche status

- Pre
- Post

Genital

### Tanner stage

- 1
- 2
- 3
- 4
- 5

Breast

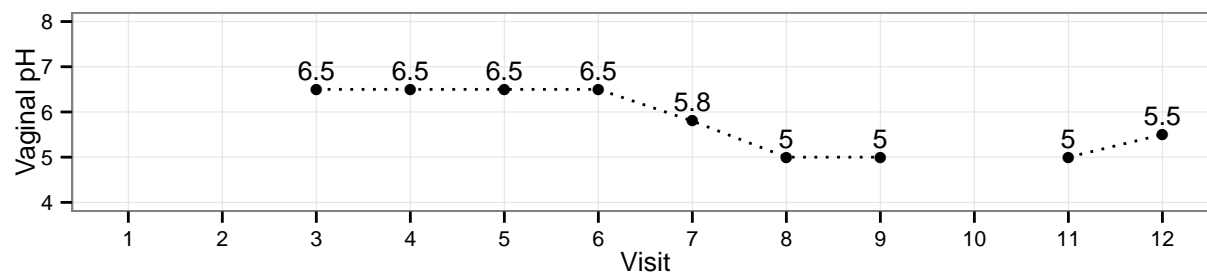

Vaginal pH

Visit

# Subject 104: Caucasian, non-Hispanic, 10.5 y/o at enrollment

## Girl Vagina

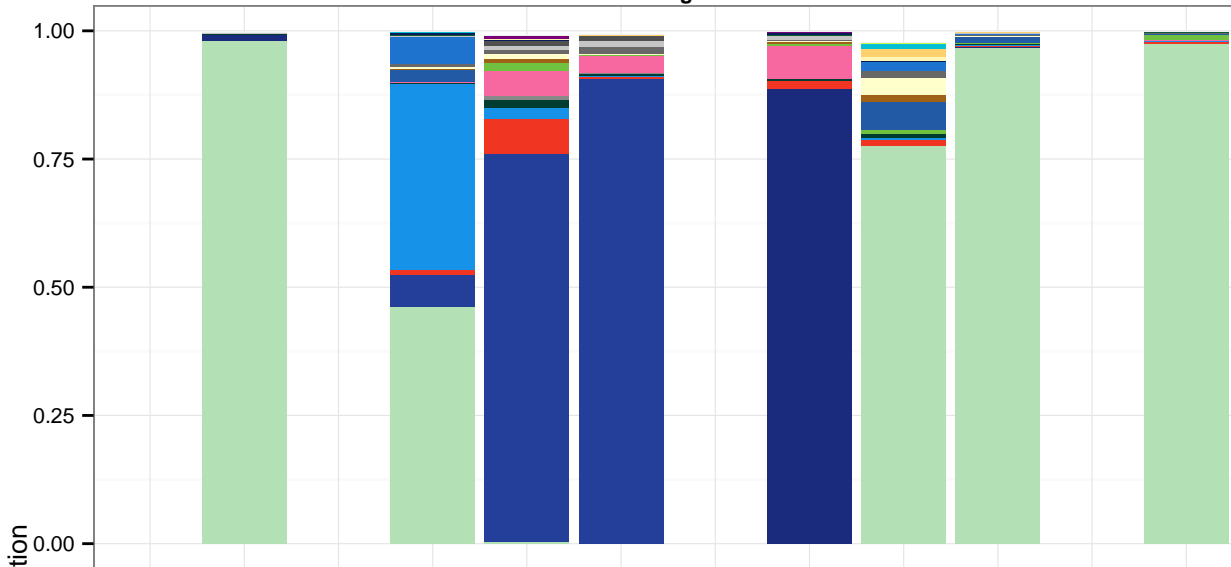

## Girl Vulva

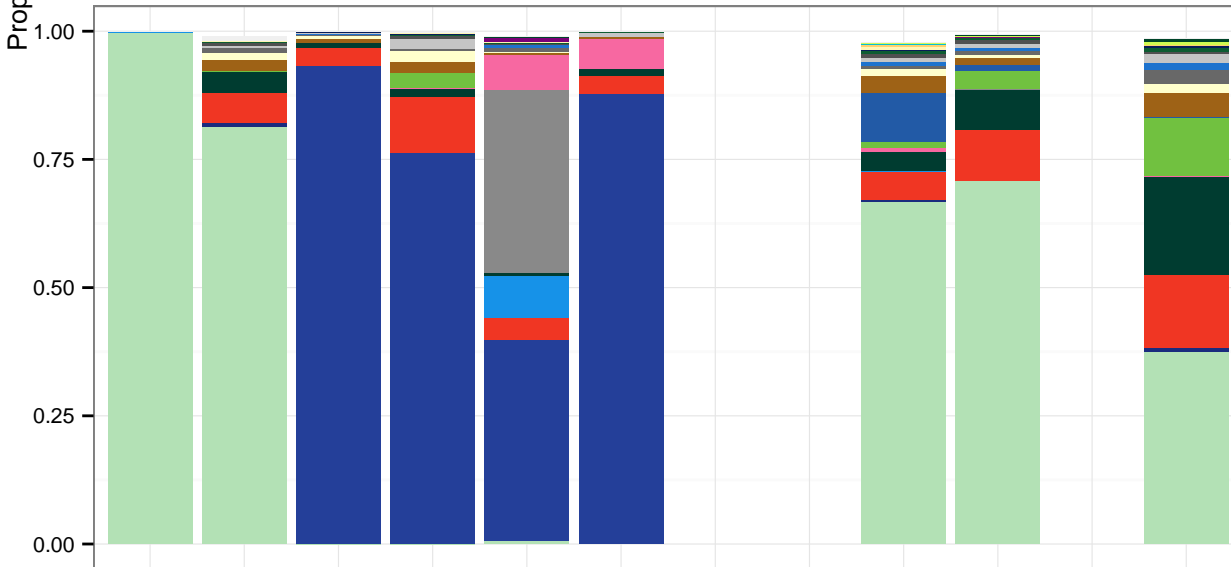

### Taxon

- Lactobacillus\_crispatus
- Streptococcus\_agalactiae
- Streptococcus\_anginosus
- Finegoldia
- Lactobacillus\_iners
- Prevotella
- Klebsiella
- Alloscardovia
- Corynebacterium
- Lactobacillus\_jensenii
- Peptoniphilus
- Anaerococcus
- Other\_Bacteria
- Lactobacillus\_Other
- Dialister
- Staphylococcus
- Segniliparus
- Streptococcus\_Other
- Anaerosphaera
- Clostridiales
- Lactobacillus\_gigeriorum
- Gardnerella\_vaginalis
- Actinomycetales
- Varibaculum
- Acidovorax

Menarche

### Menarche status

- Pre
- Post

Genital

Breast

### Tanner stage

- 1
- 2
- 3
- 4
- 5

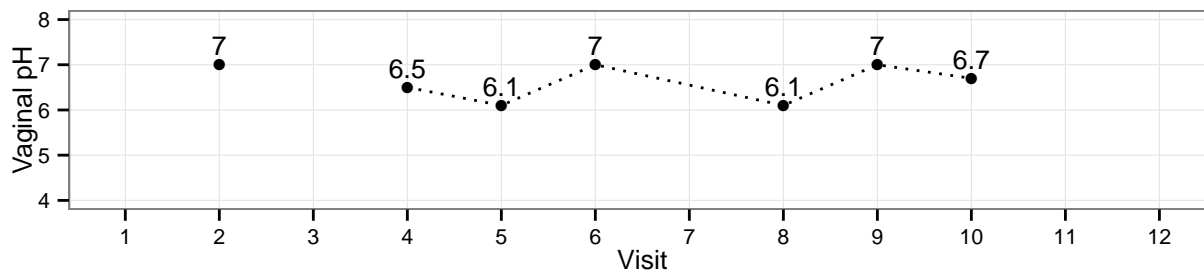

# Subject 105: Caucasian, Hispanic, 10.2 y/o at enrollment

## Girl Vagina

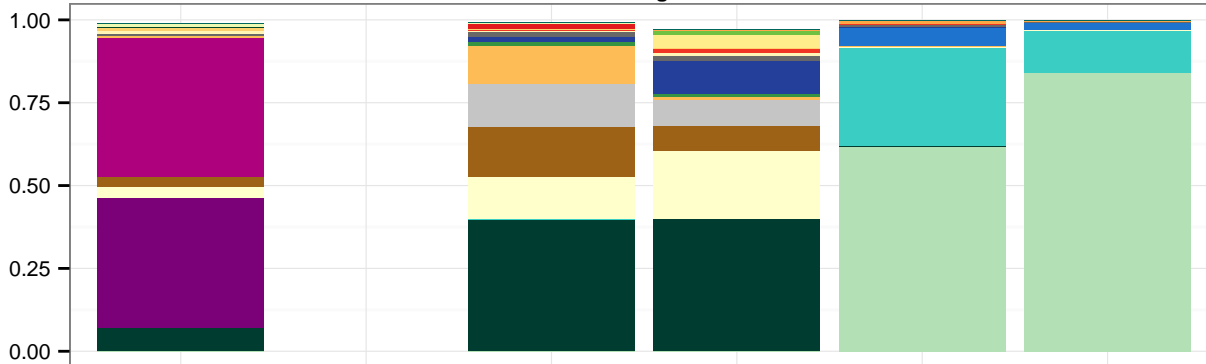

## Girl Vulva

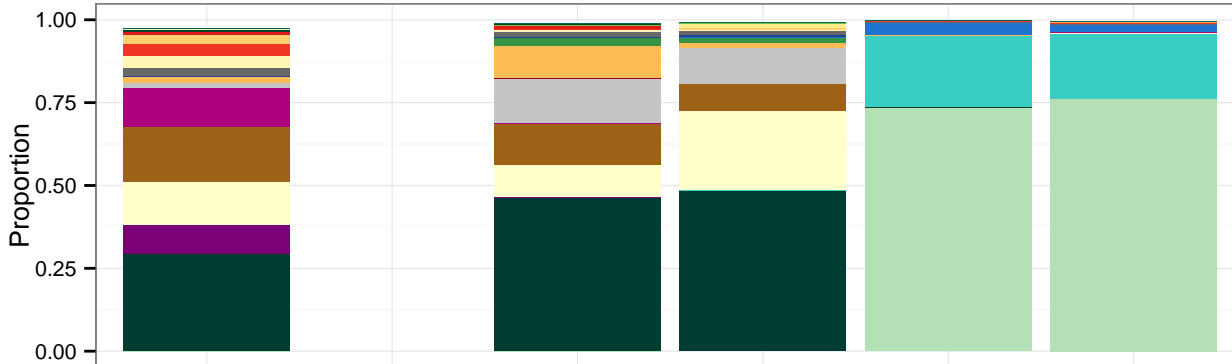

## Mother Vagina

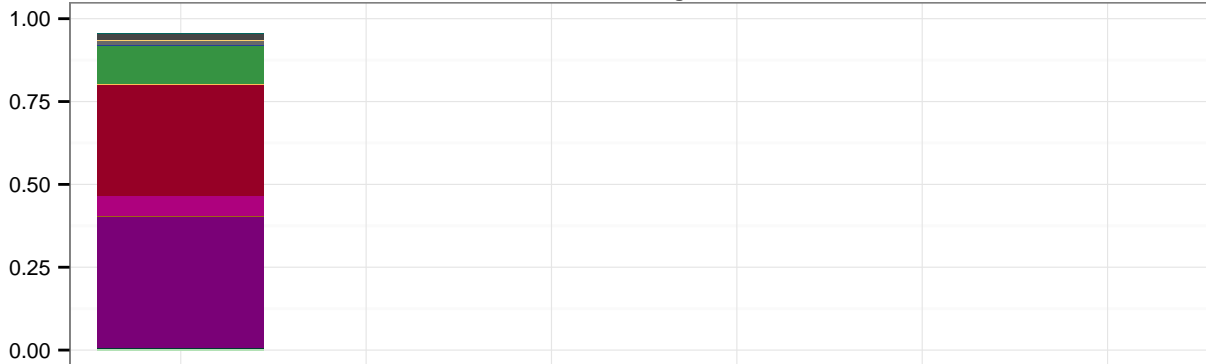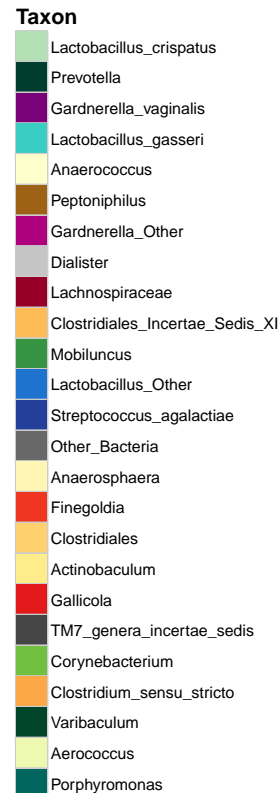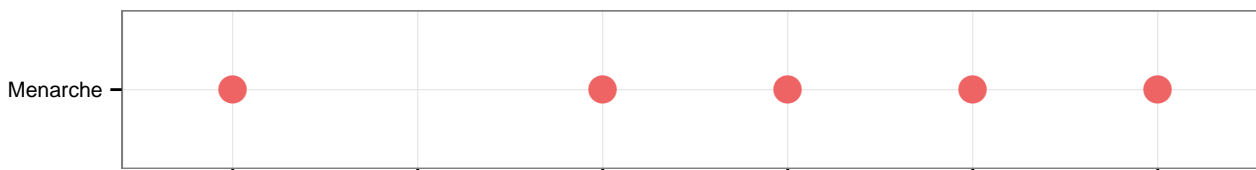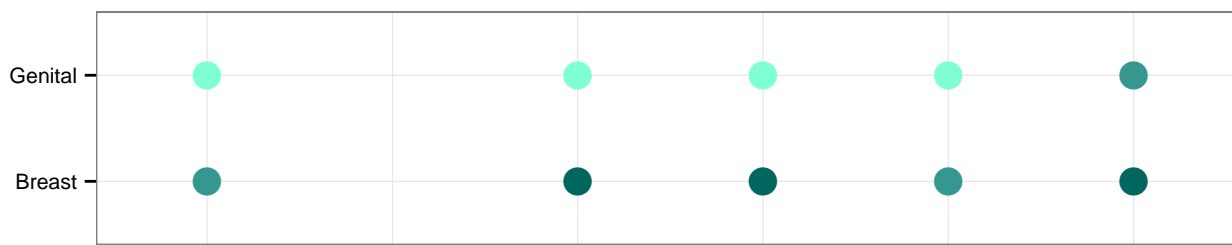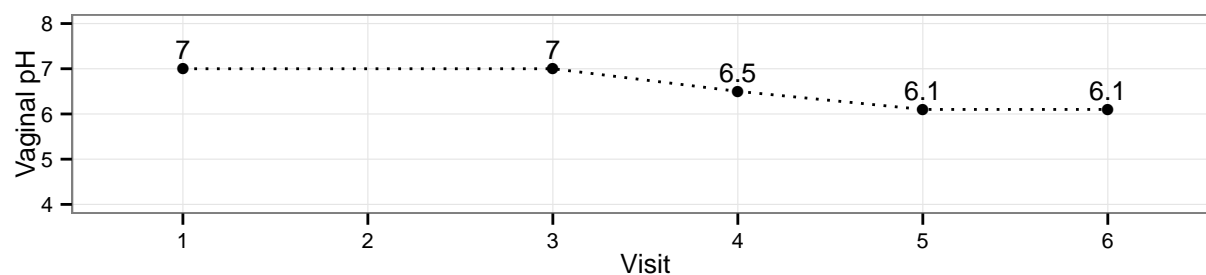

# Subject 106: Black, non-Hispanic, 12.3 y/o at enrollment

## Girl Vagina

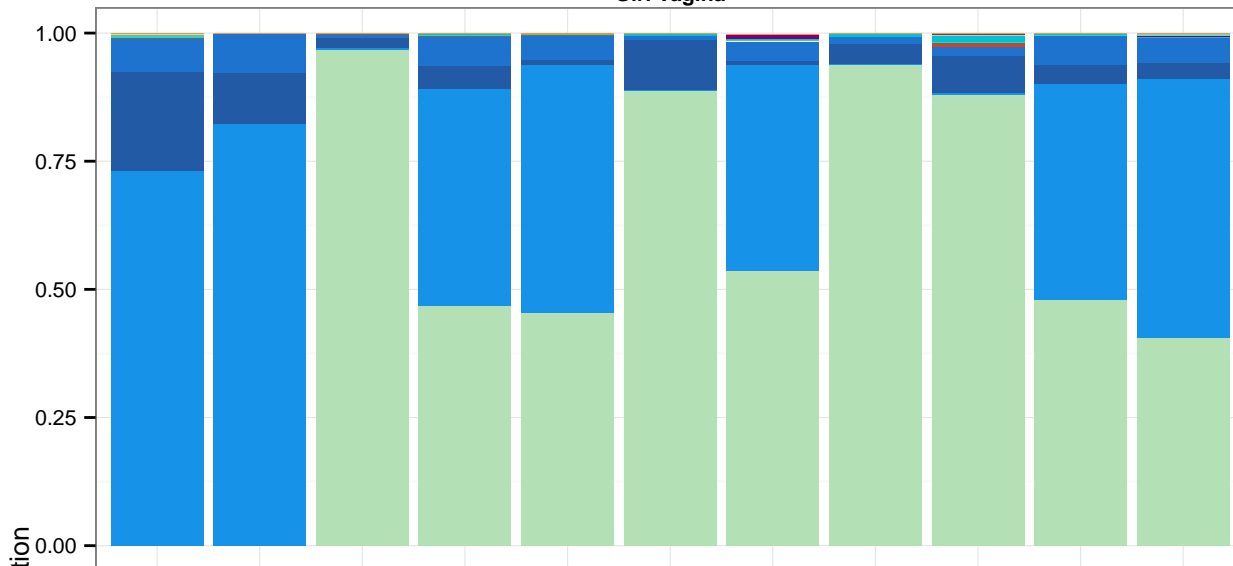

## Girl Vulva

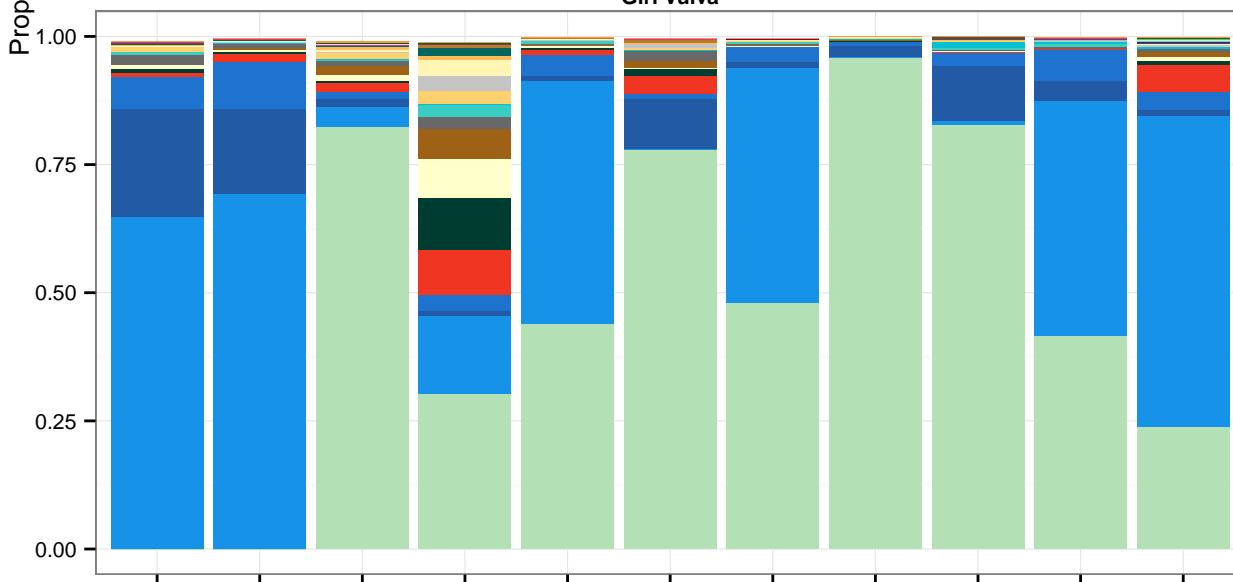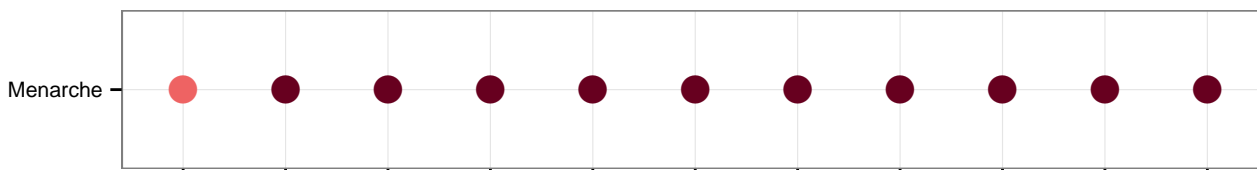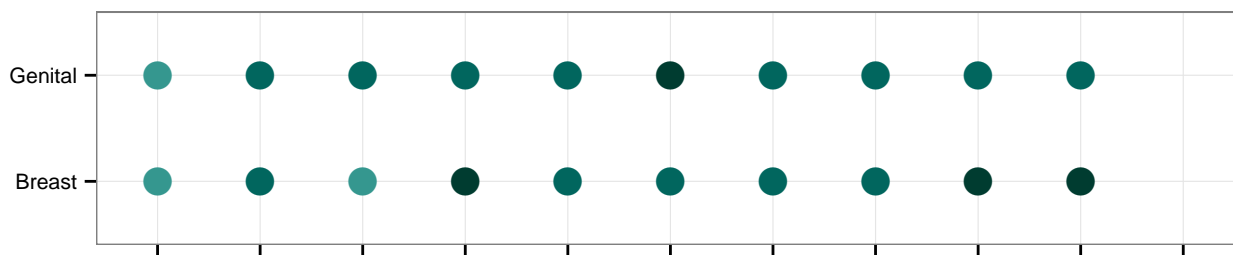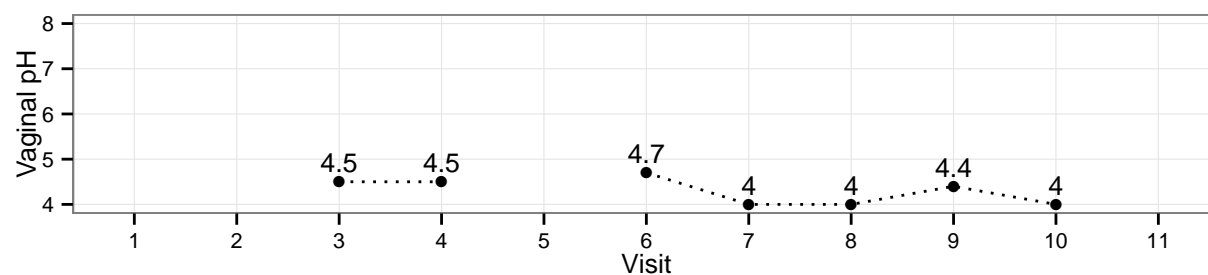

- Taxon**
- Lactobacillus\_crispatus
  - Lactobacillus\_iners
  - Lactobacillus\_jensenii
  - Lactobacillus\_Other
  - Finexgoldia
  - Prevotella
  - Anaerococcus
  - Peptoniphilus
  - Other\_Bacteria
  - Lactobacillus\_gasseri
  - Lactobacillus\_gigeriorum
  - Clostridiales
  - Dialister
  - Anaerosphaera
  - Clostridiales\_Incertae\_Sedis\_XI
  - Porphyromonas
  - Peptostreptococcus
  - Gardnerella\_vaginalis
  - Lactobacillus\_coleohominis
  - Staphylococcus
  - Bifidobacterium
  - Bacteroides
  - Corynebacterium
  - Segniliparus
  - Clostridium\_XI

- Menarche status**
- Pre
  - Post

- Tanner stage**
- 1
  - 2
  - 3
  - 4
  - 5

# Subject 107: Black, non-Hispanic, 12.4 y/o at enrollment

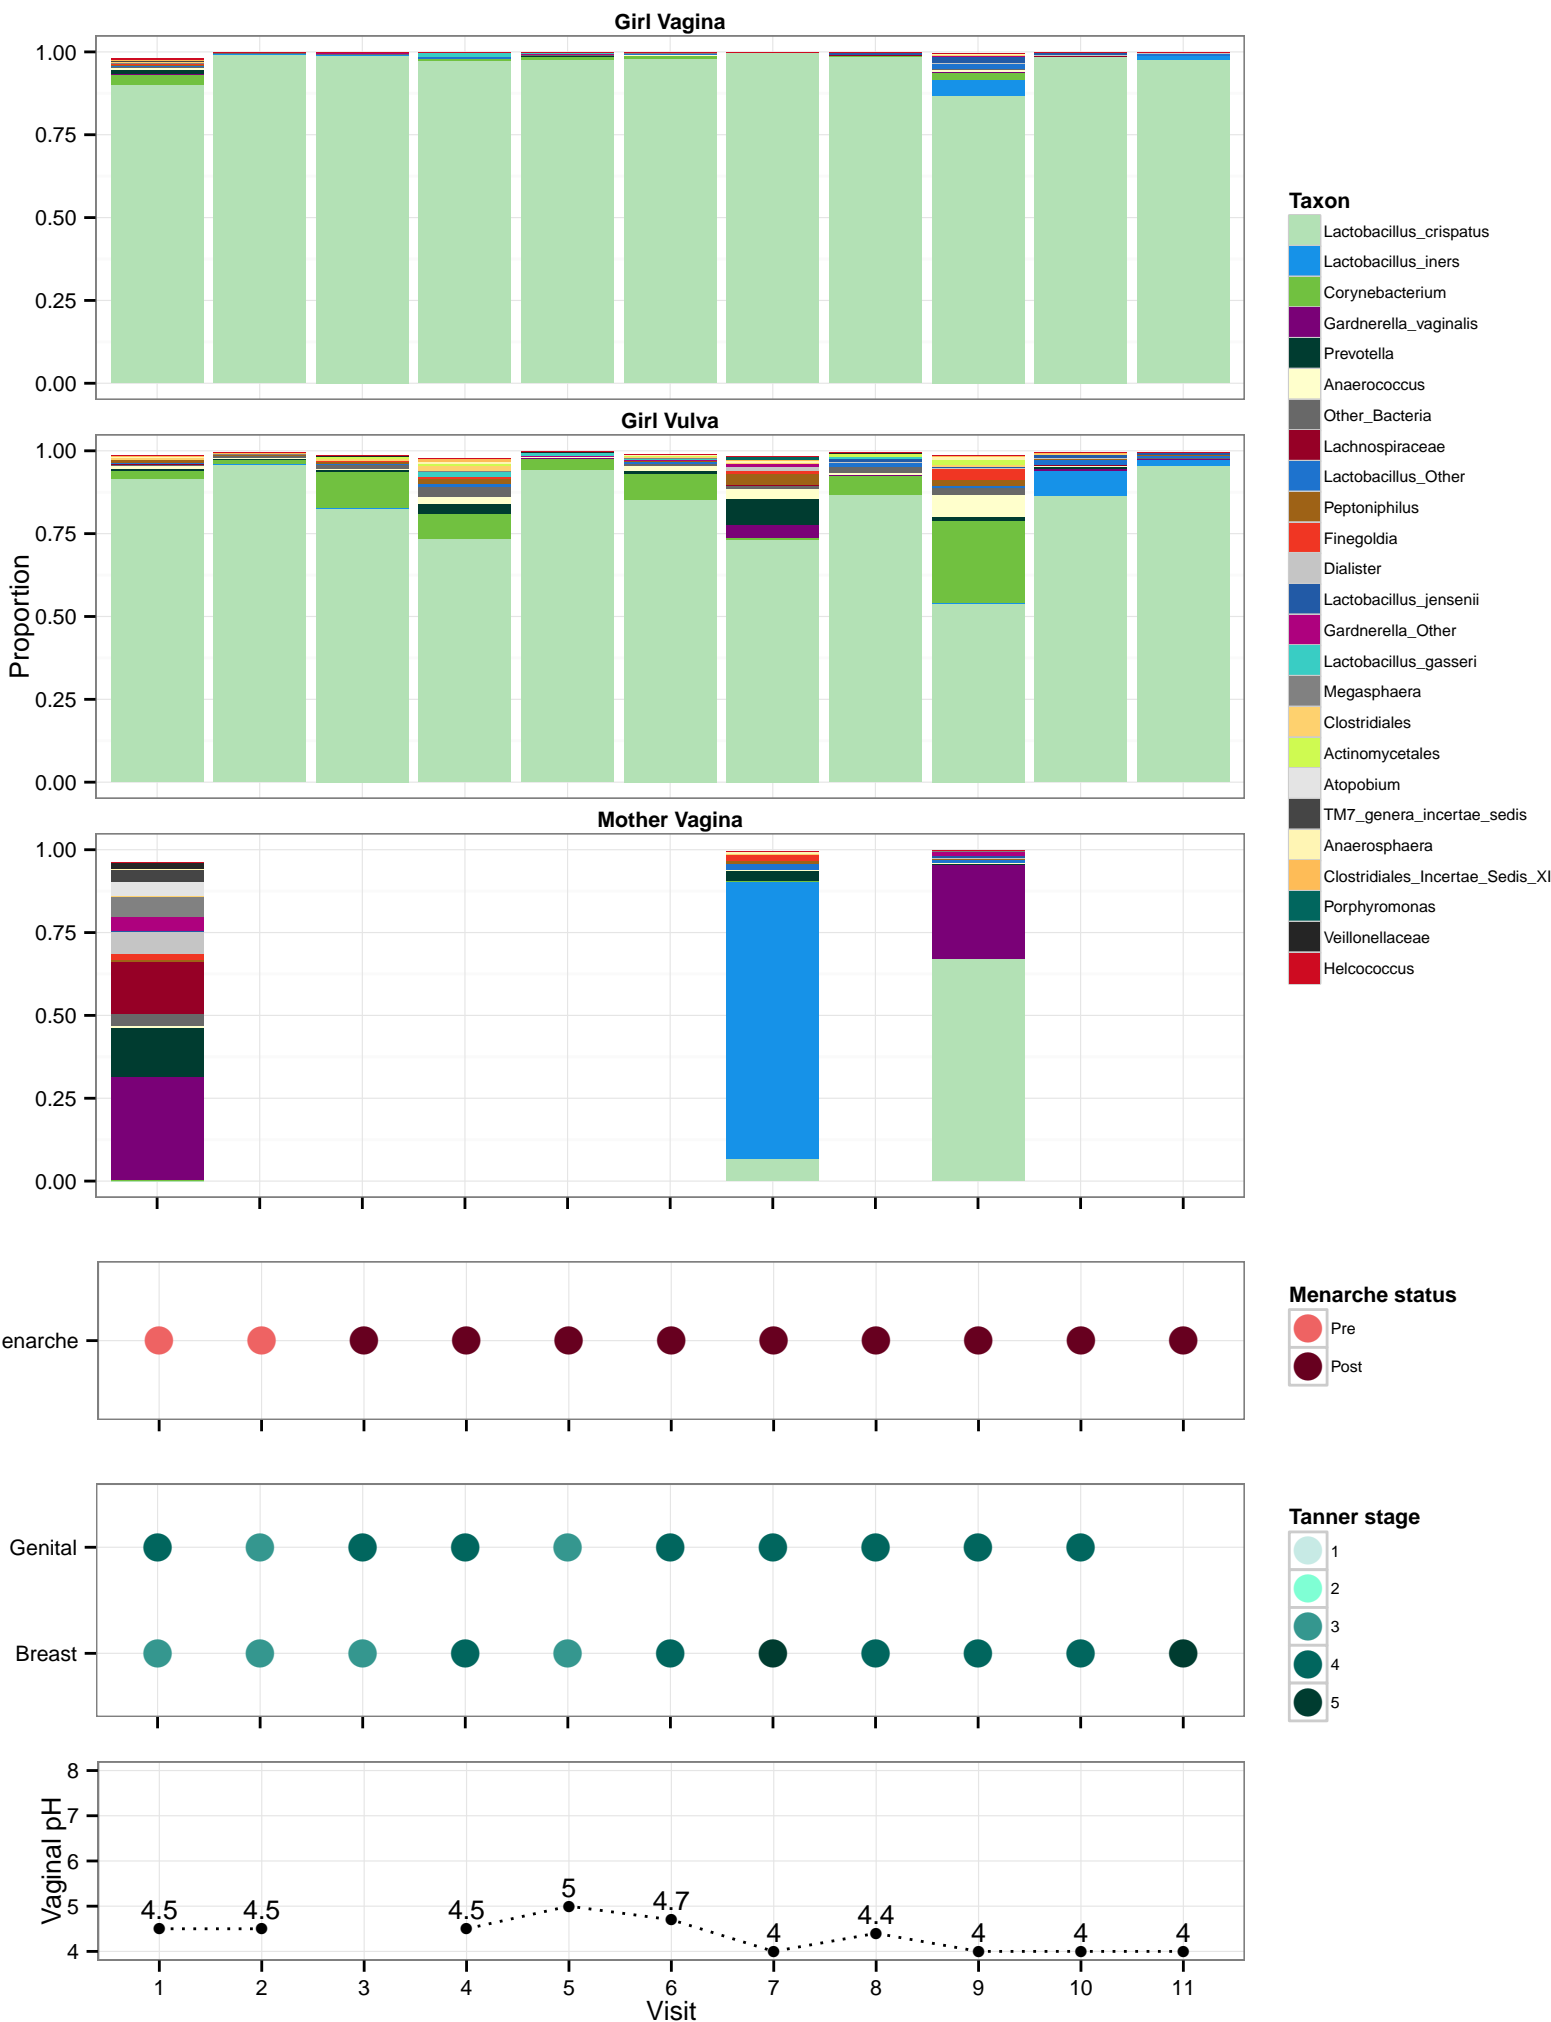

# Subject 108: Black, non-Hispanic, 11.5 y/o at enrollment

## Girl Vagina

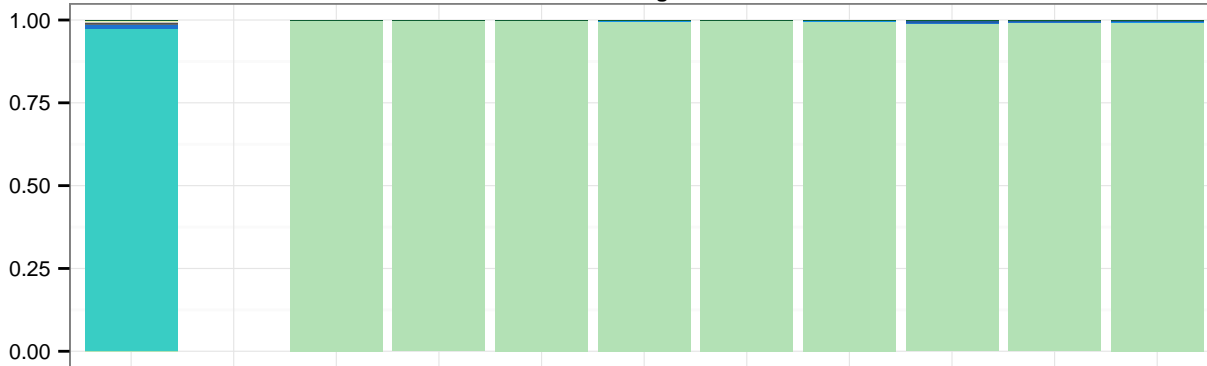

## Girl Vulva

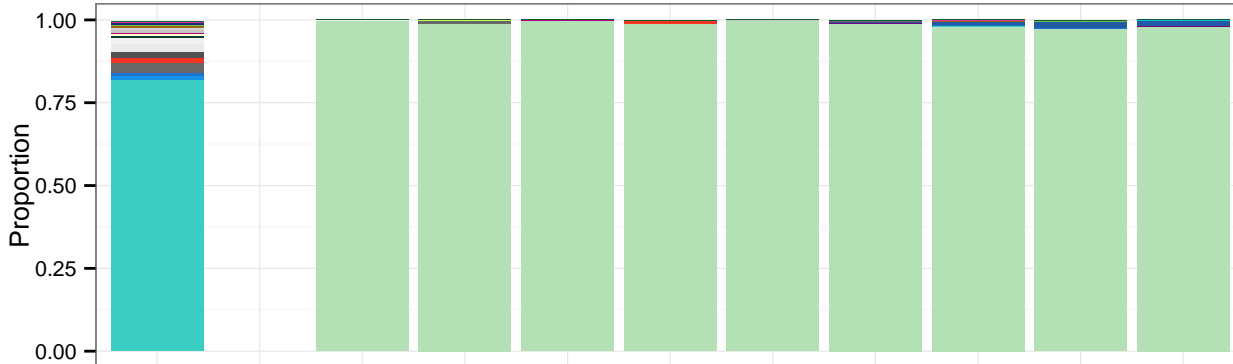

## Mother Vagina

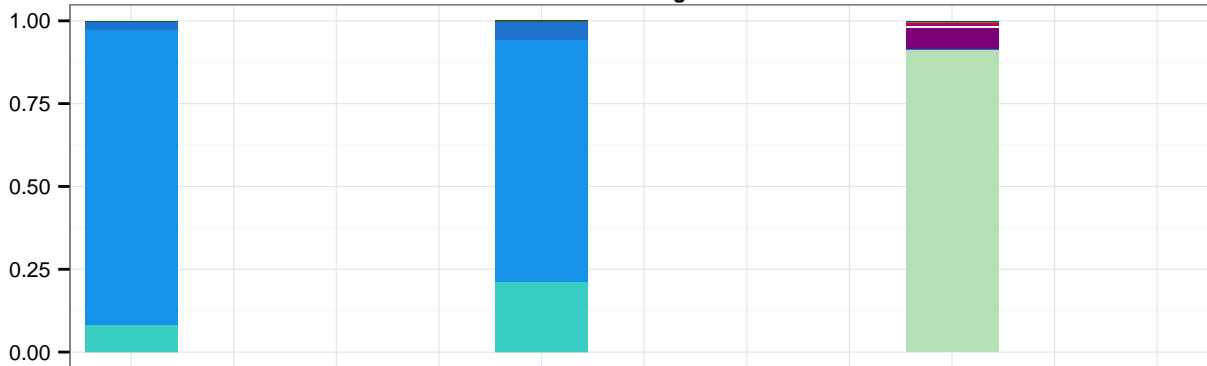

### Taxon

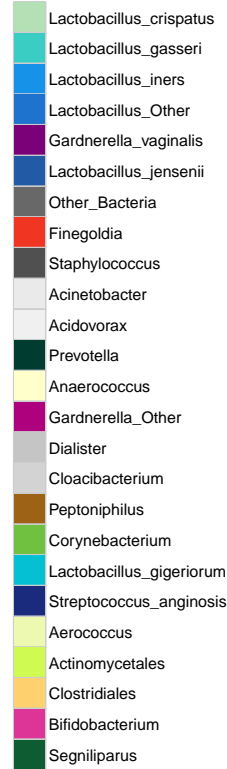

Menarche

### Menarche status

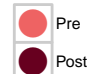

Genital

Breast

### Tanner stage

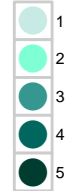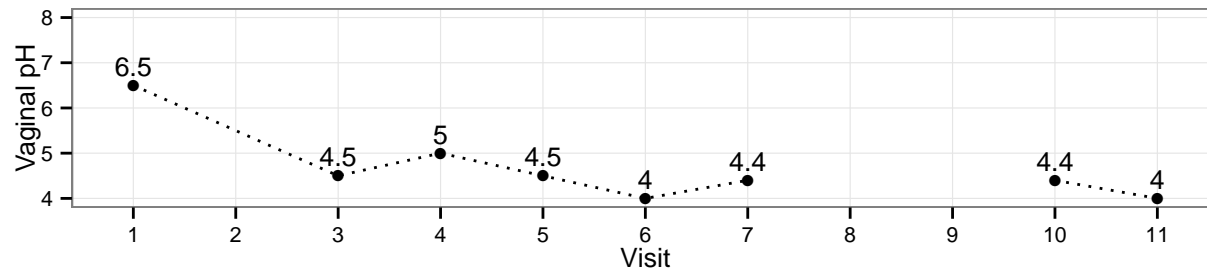



# Subject 109: Black, non-Hispanic, 10.6 y/o at enrollment

## Girl Vagina

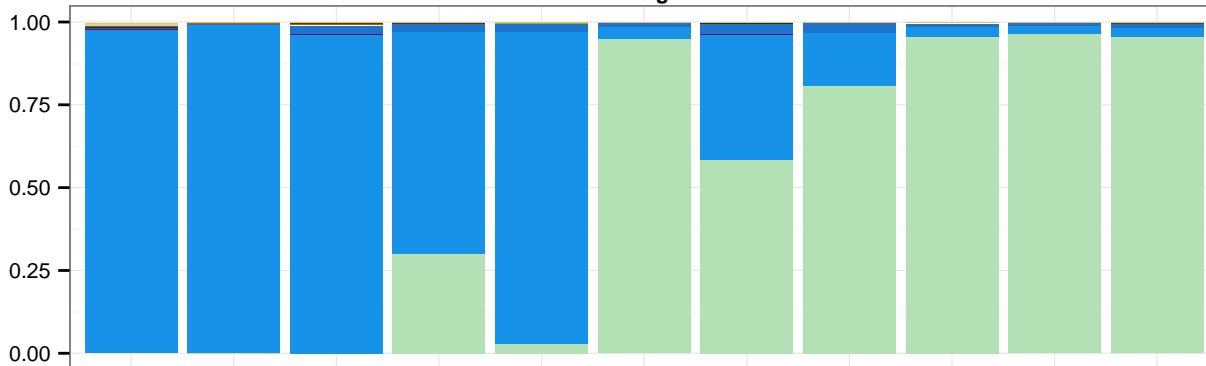

## Girl Vulva

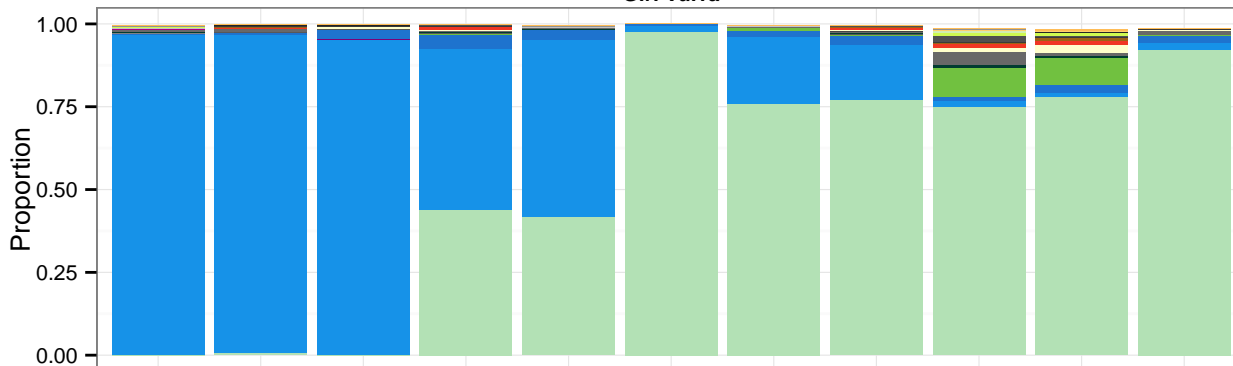

## Mother Vagina

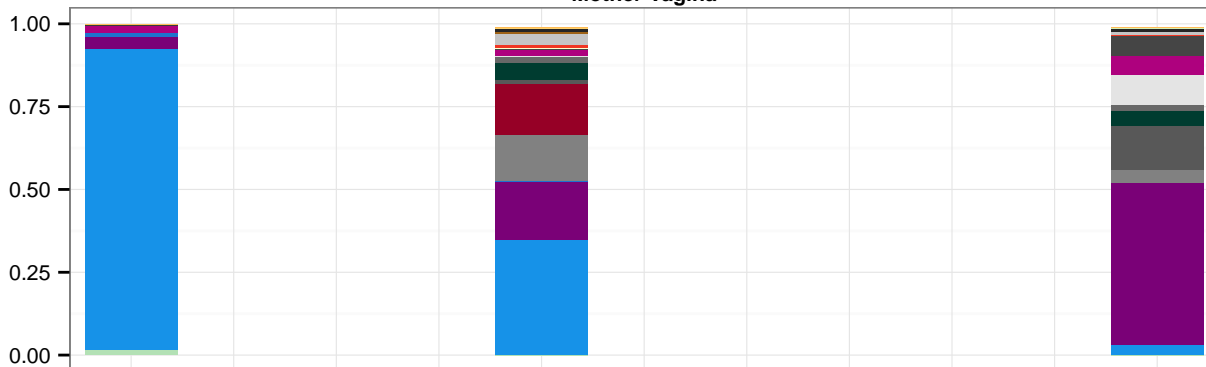

### Taxon

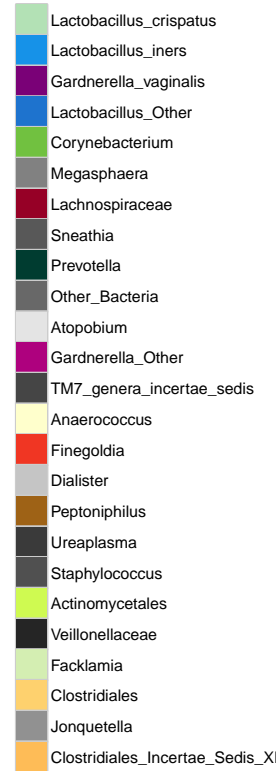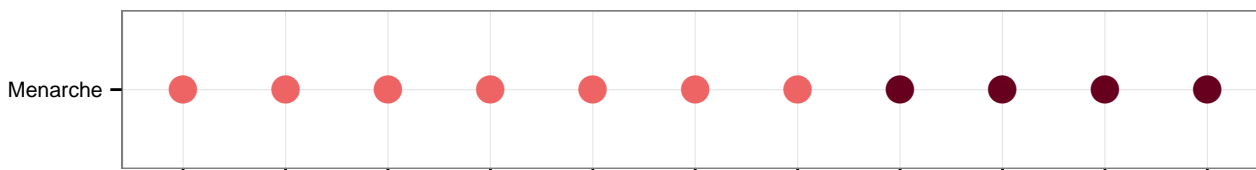

### Menarche status

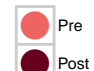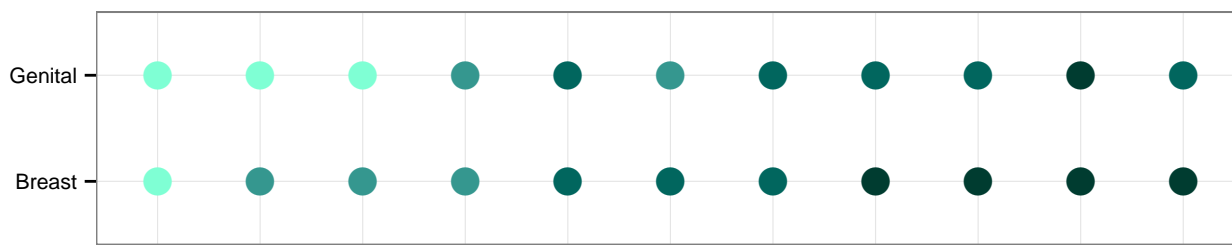

### Tanner stage

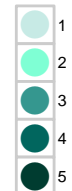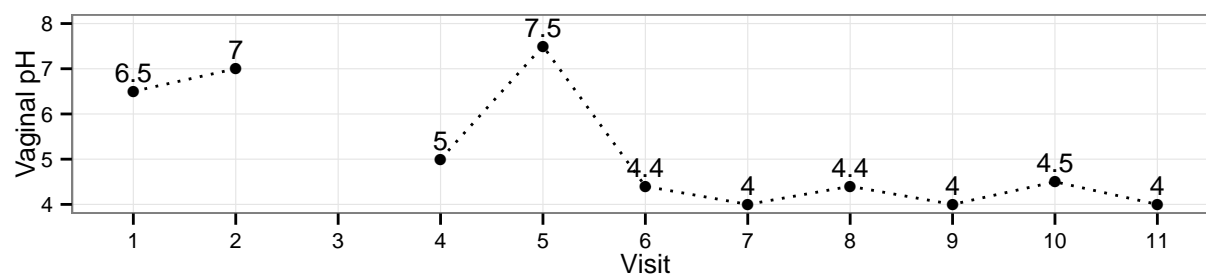

# Subject 110: Black, non-Hispanic, 10.1 y/o at enrollment

Girl Vagina

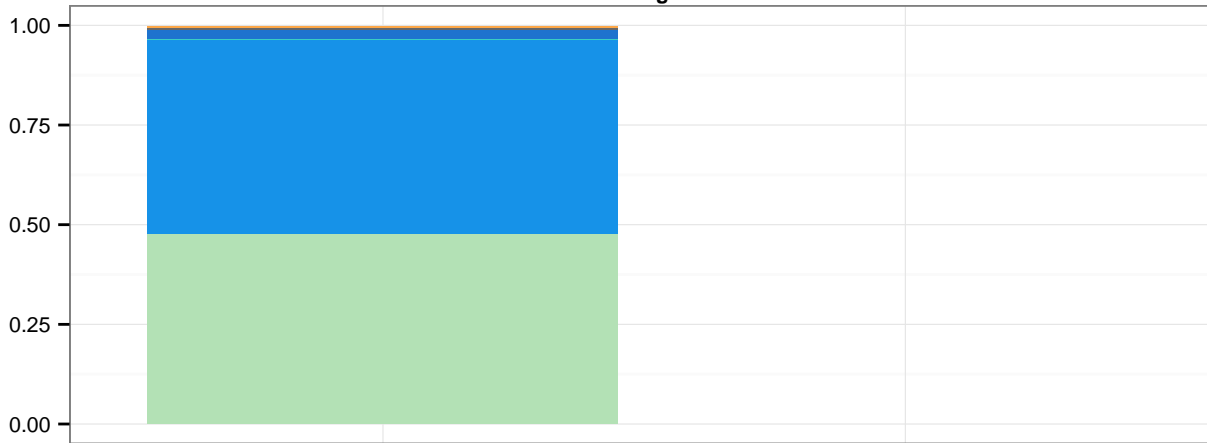

Girl Vulva

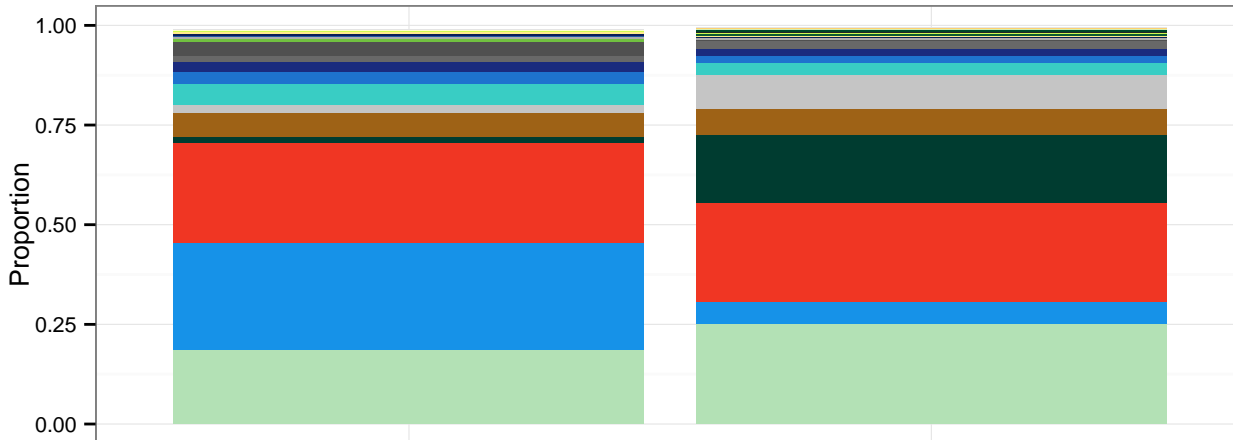

Mother Vagina

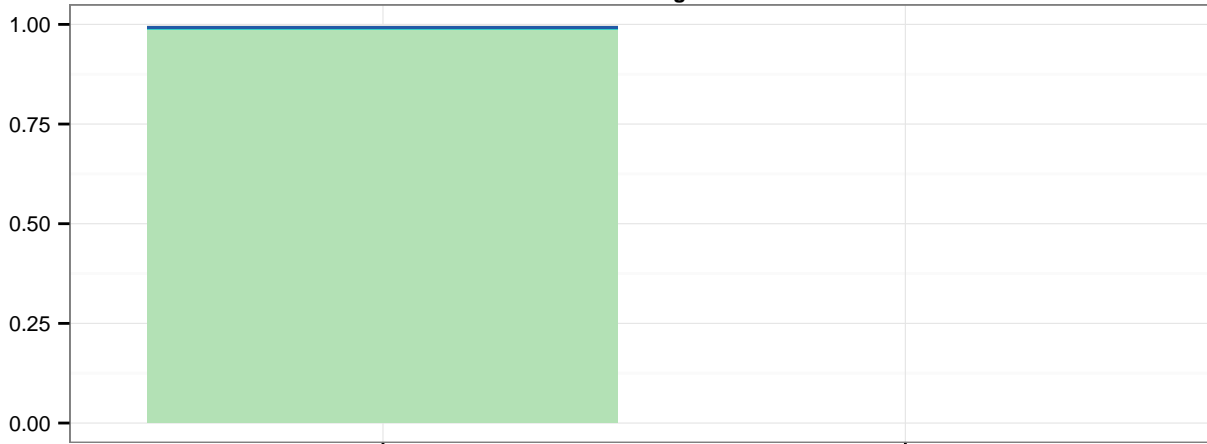

**Taxon**

- Lactobacillus\_crispatus
- Lactobacillus\_iners
- Finegoldia
- Prevotella
- Peptoniphilus
- Dialister
- Lactobacillus\_gasseri
- Lactobacillus\_Other
- Streptococcus\_anginosus
- Other\_Bacteria
- Staphylococcus
- Corynebacterium
- Fusobacterium
- Lactobacillus\_jensenii
- Streptococcus\_Other
- Clostridium\_sensu\_stricto
- Actinobaculum
- Segniliparus
- Actinomycetales
- Veillonellaceae
- Varibaculum
- Anaerococcus
- Facklamia
- Clostridiales
- Atopobium

**Menarche status**

- Pre
- Post

**Tanner stage**

- 1
- 2
- 3
- 4
- 5

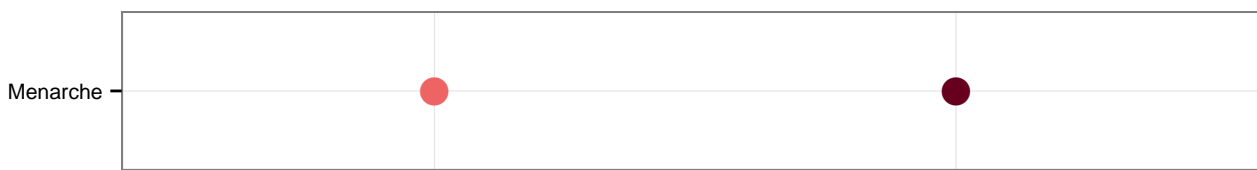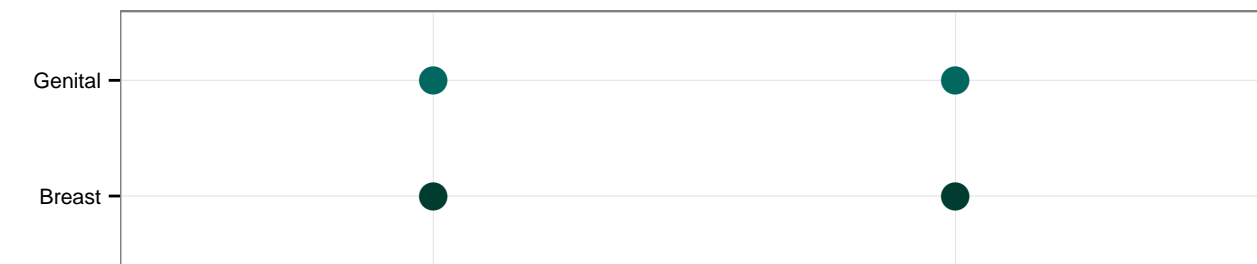

1

2

Visit

# Subject 111: Black, non-Hispanic, 10.4 y/o at enrollment

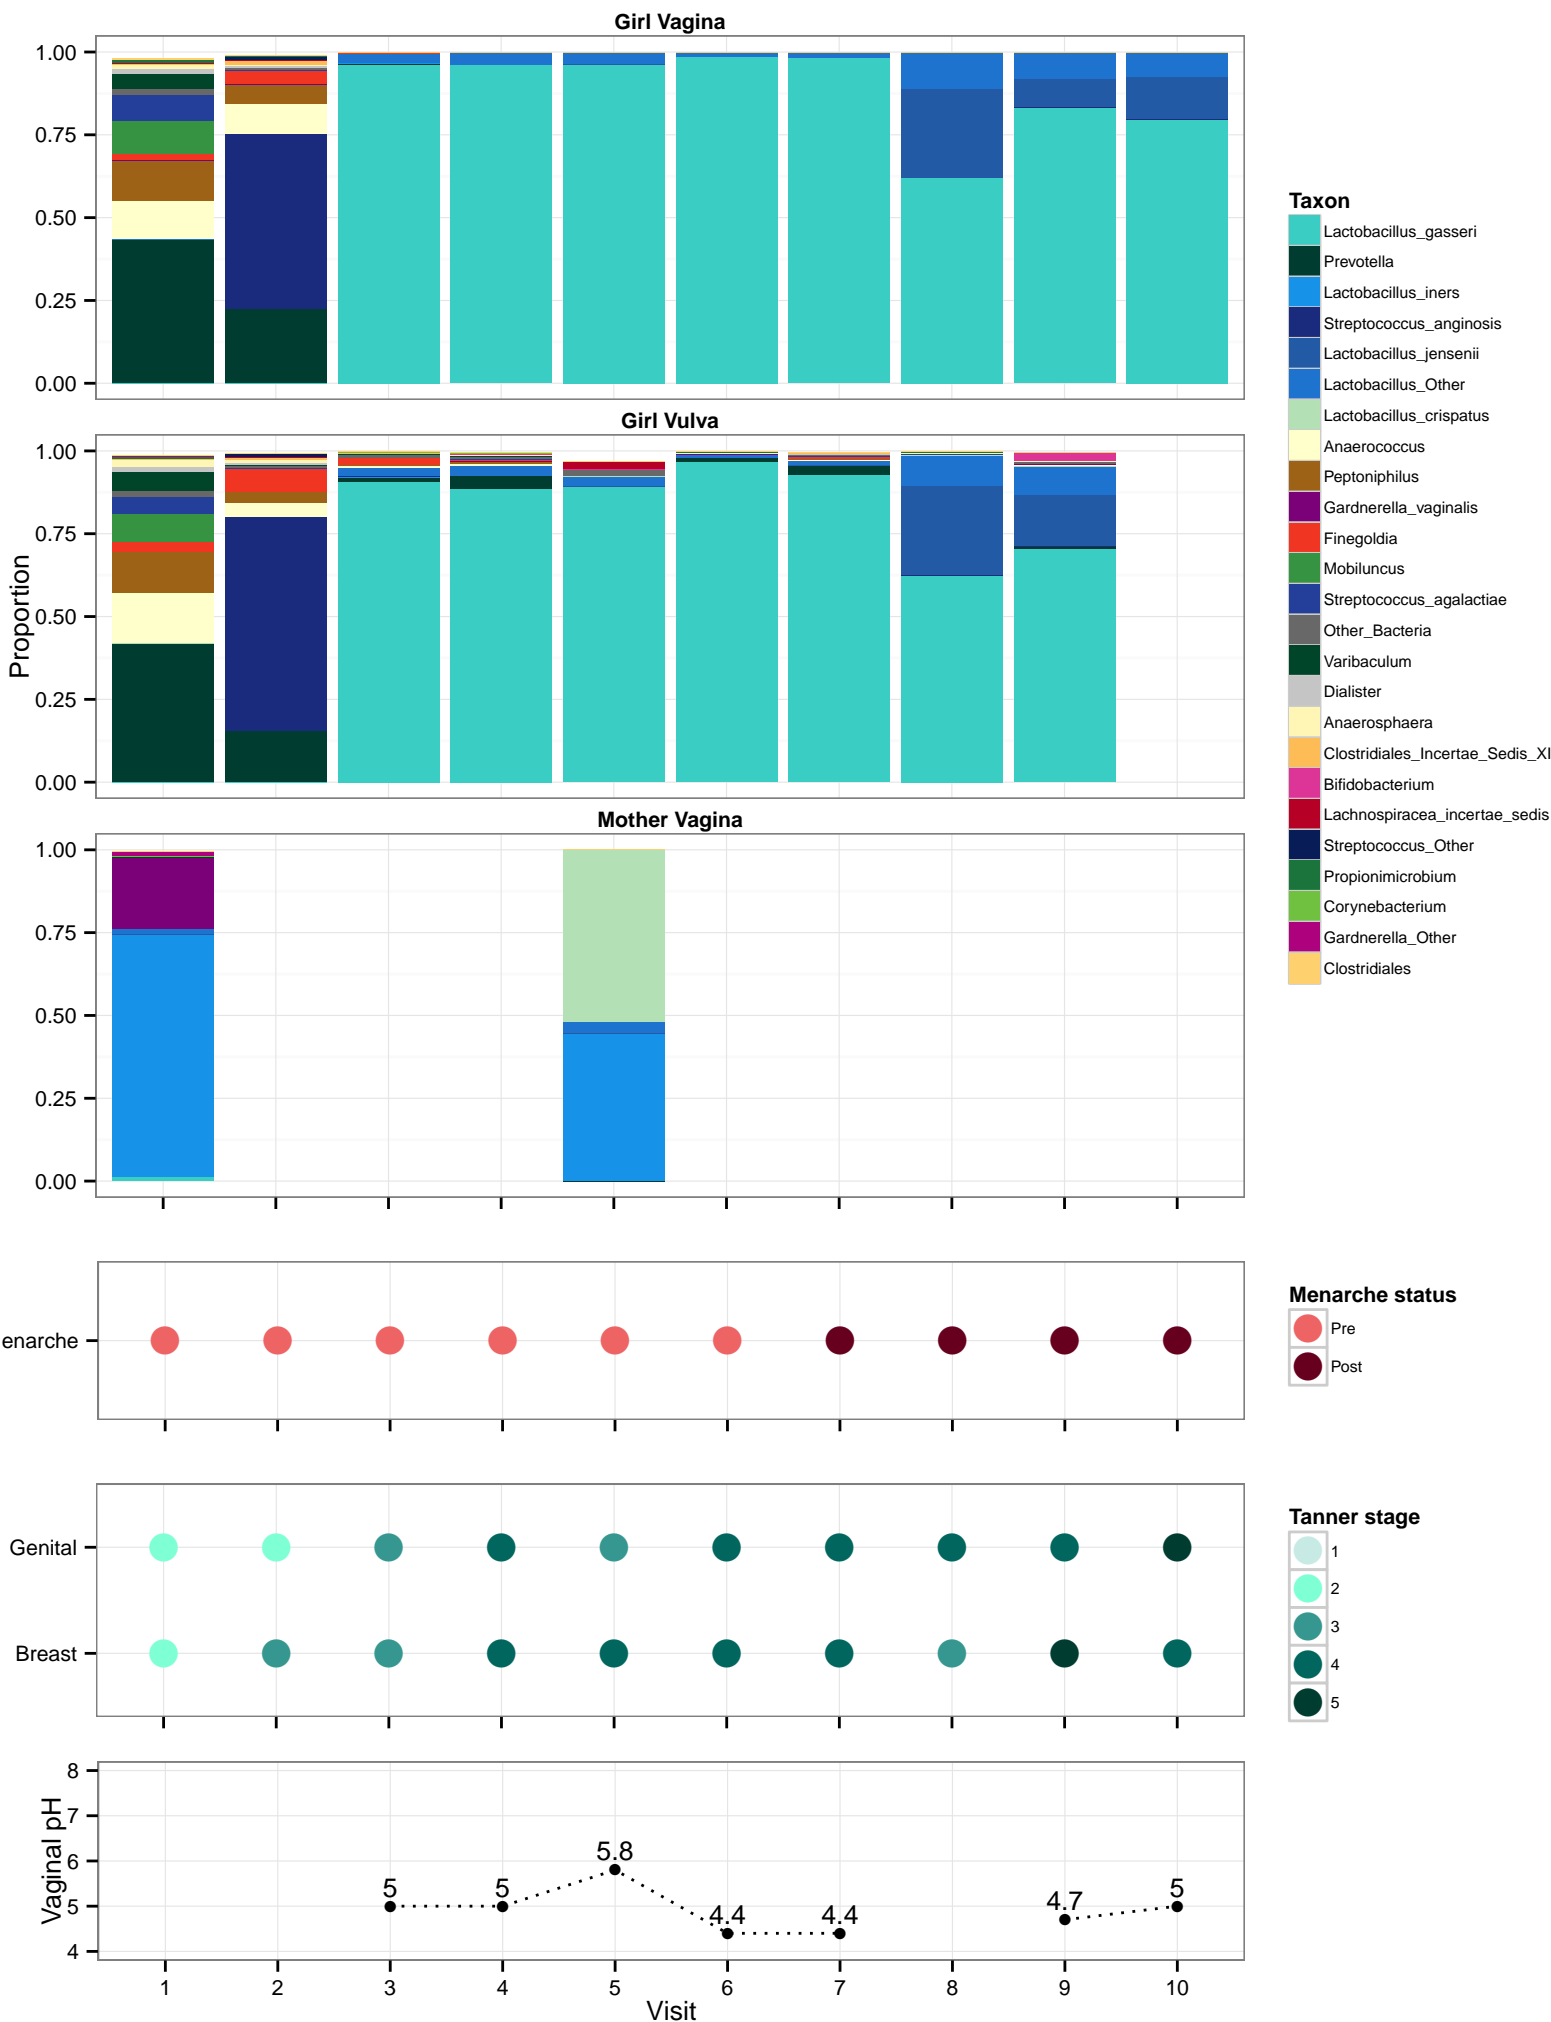

# Subject 112: Black, non-Hispanic, 10.1 y/o at enrollment

## Girl Vagina

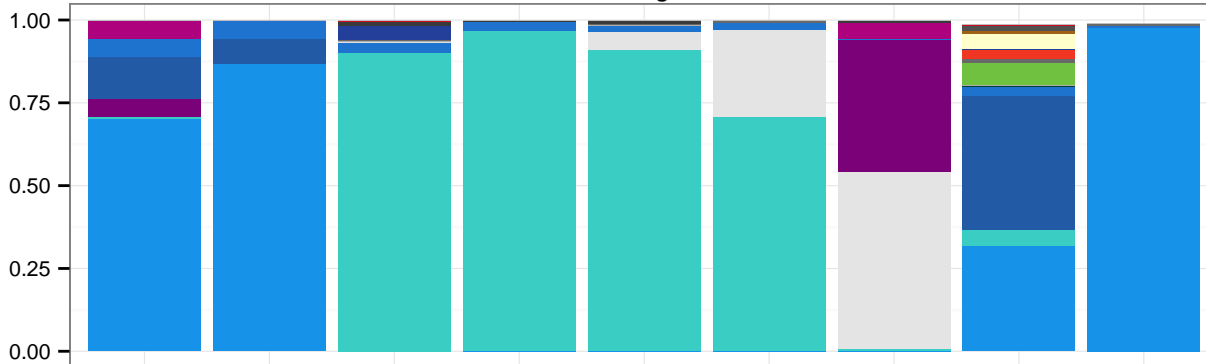

## Girl Vulva

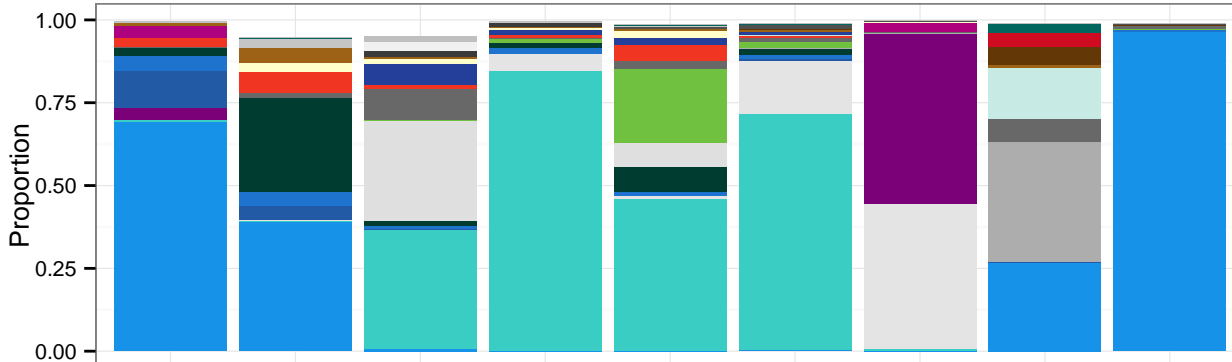

## Mother Vagina

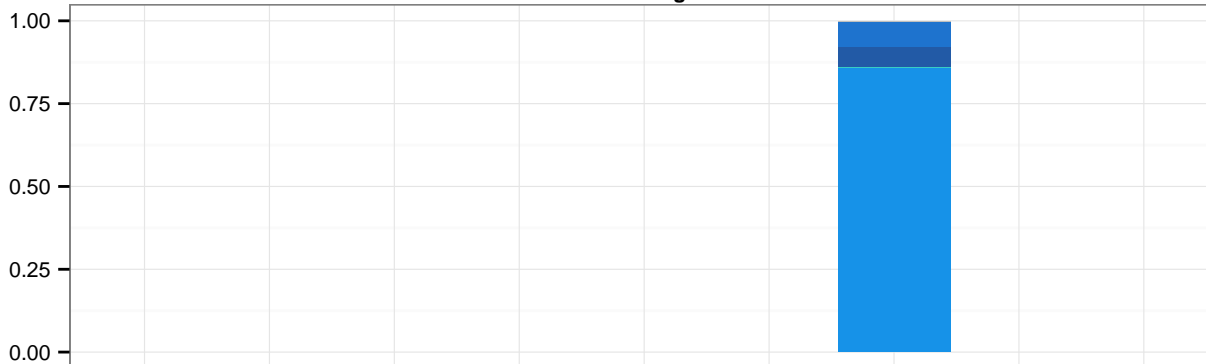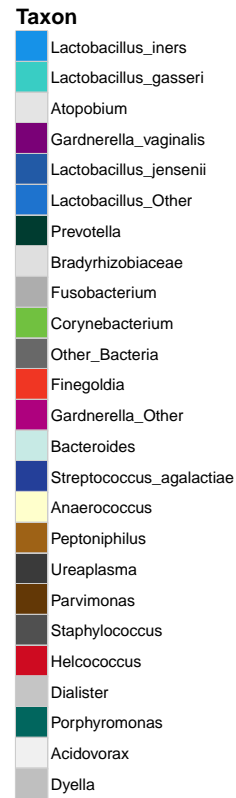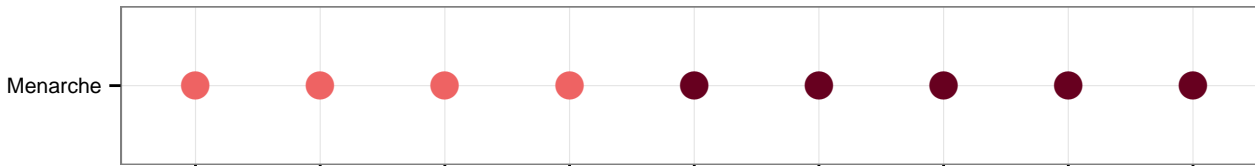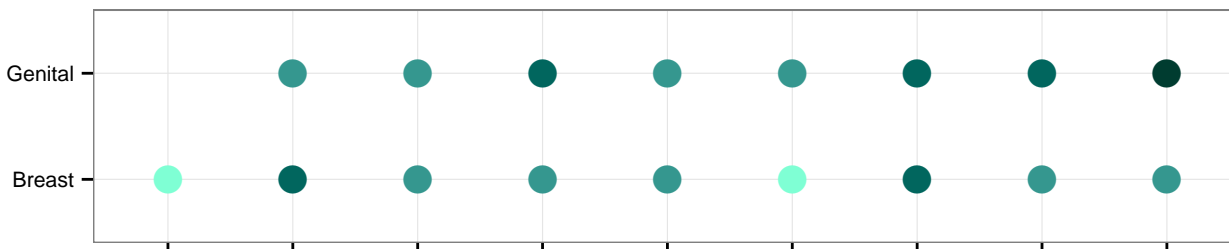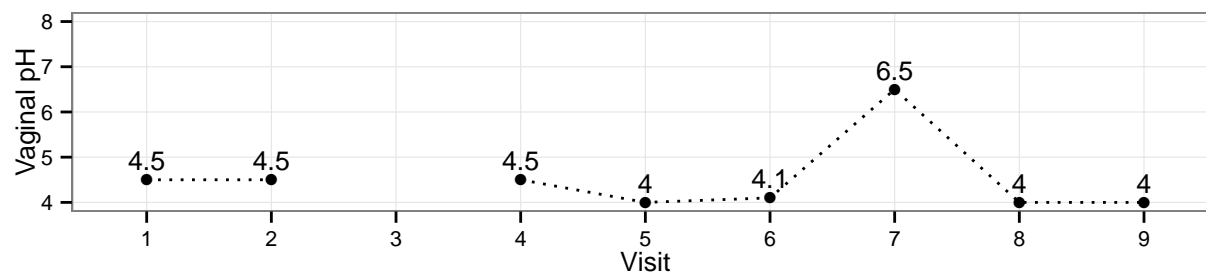

# Subject 113: Black, non-Hispanic, 11.6 y/o at enrollment

## Girl Vagina

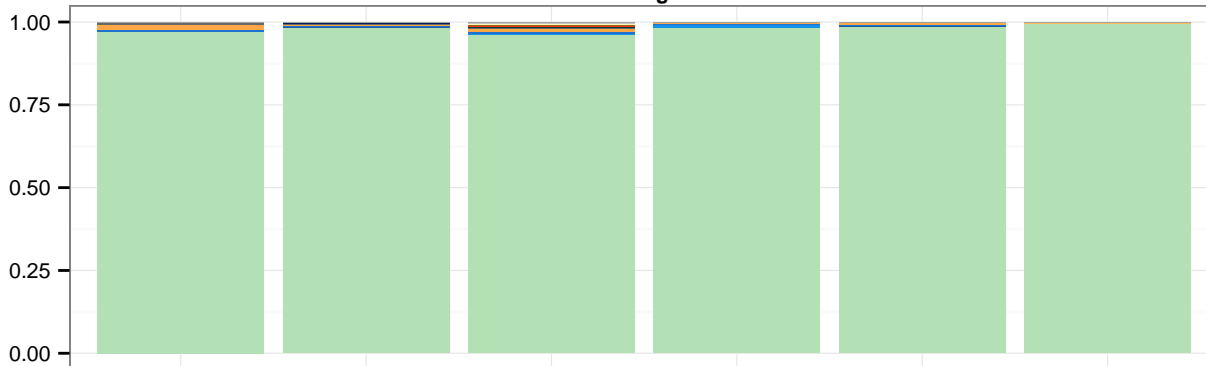

## Girl Vulva

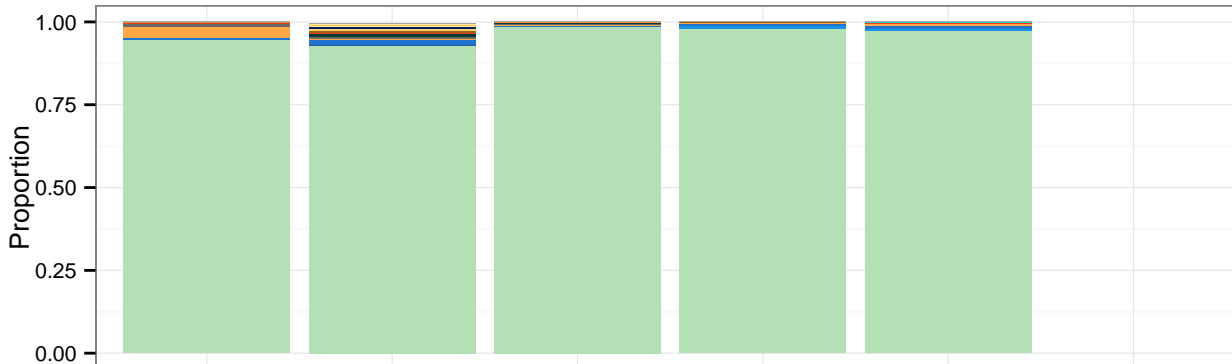

## Mother Vagina

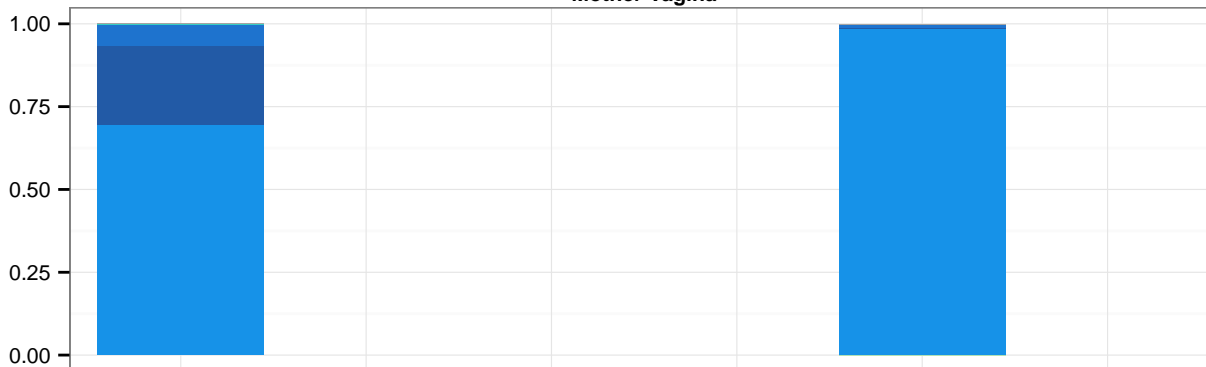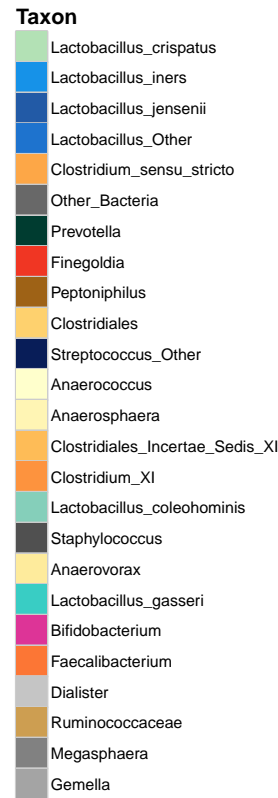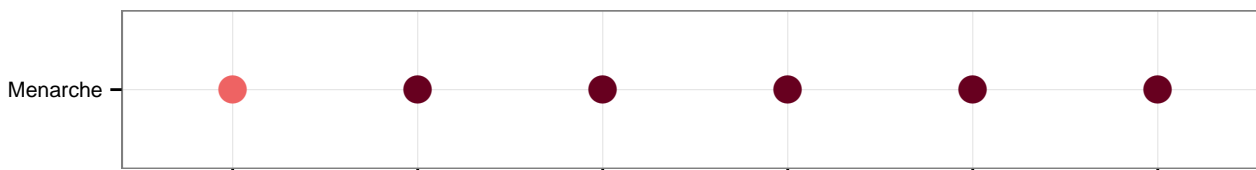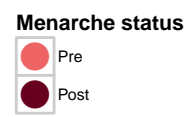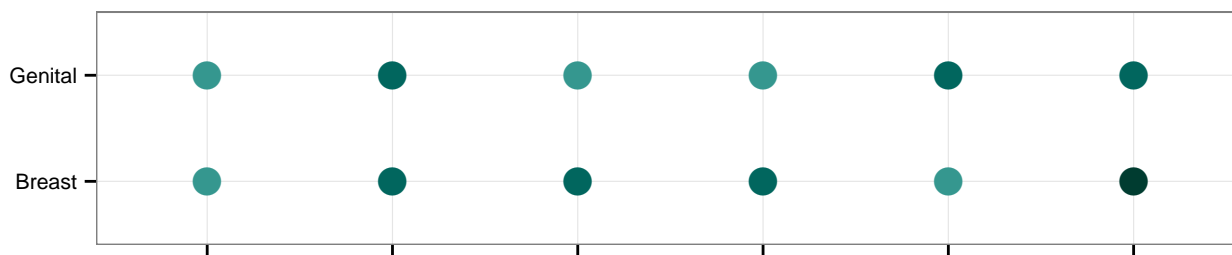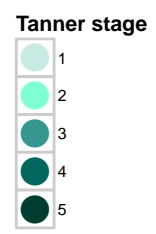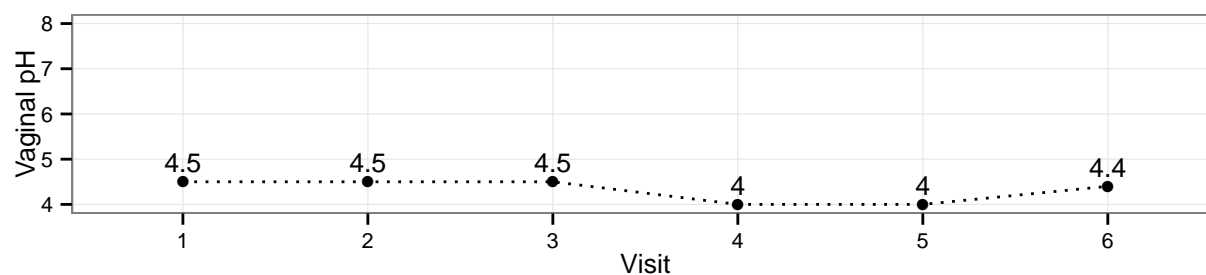

Visit

# Subject 114: Black, non-Hispanic, 11 y/o at enrollment

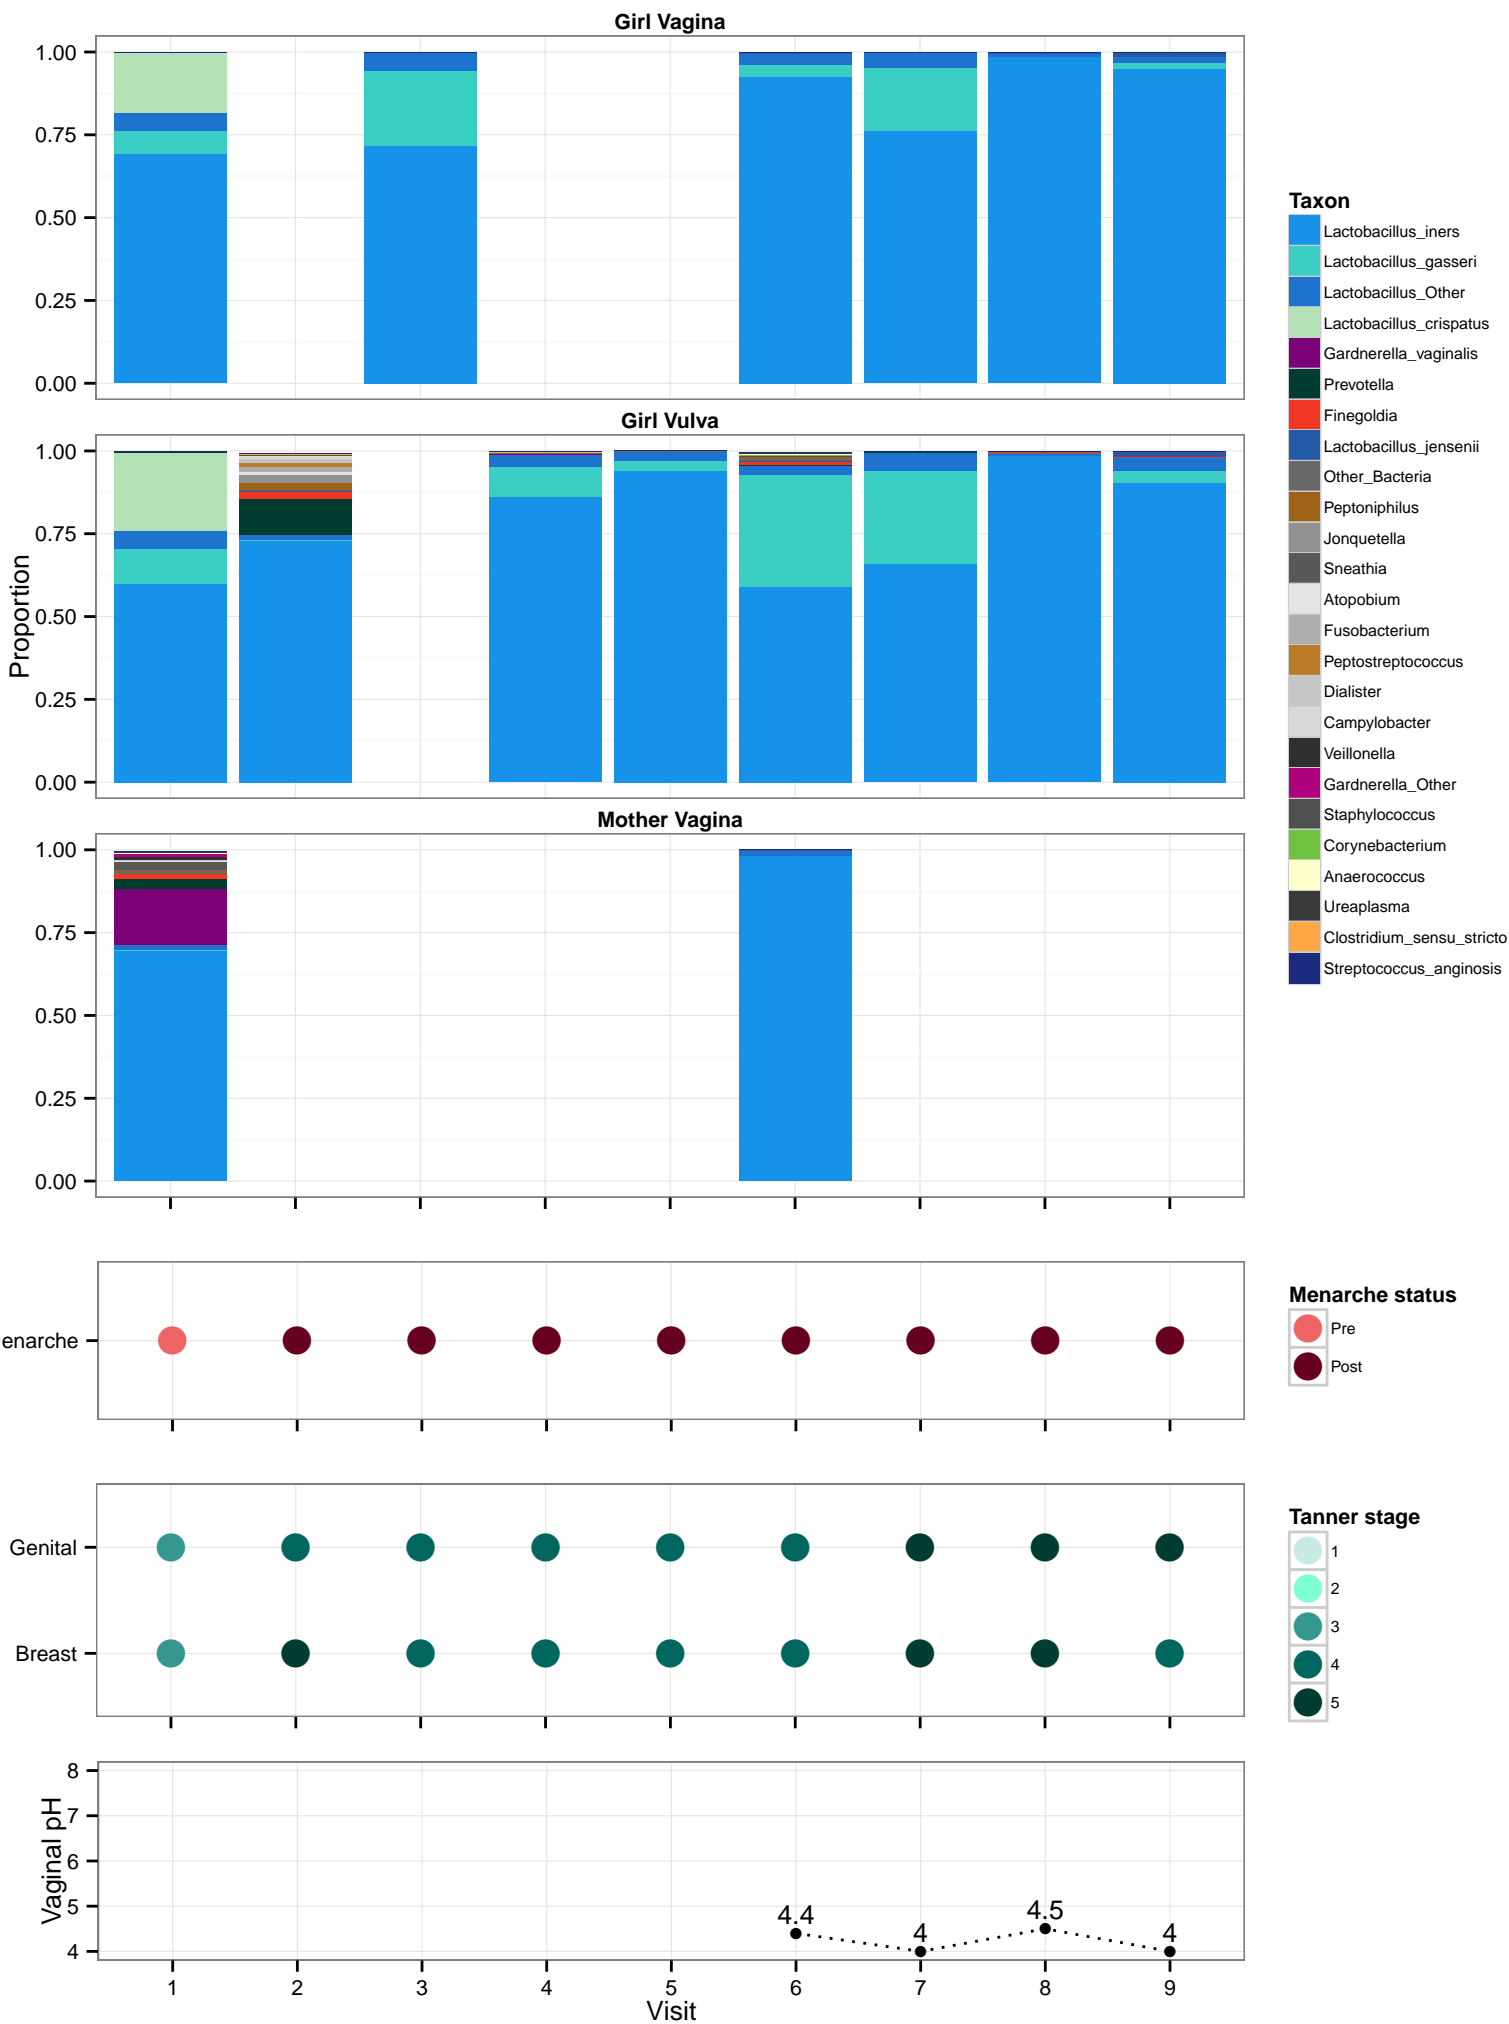

# Subject 115: Caucasian, non-Hispanic, 11 y/o at enrollment

## Girl Vagina

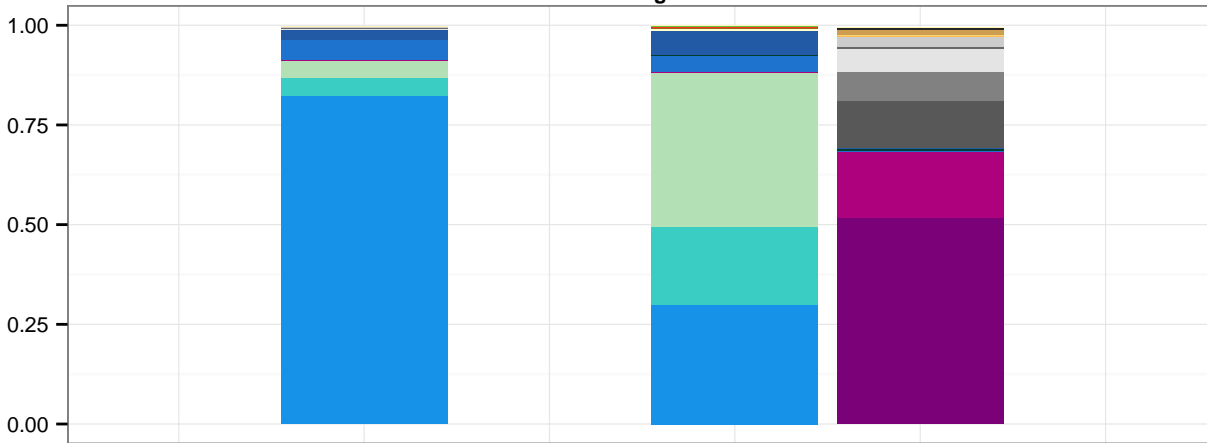

## Girl Vulva

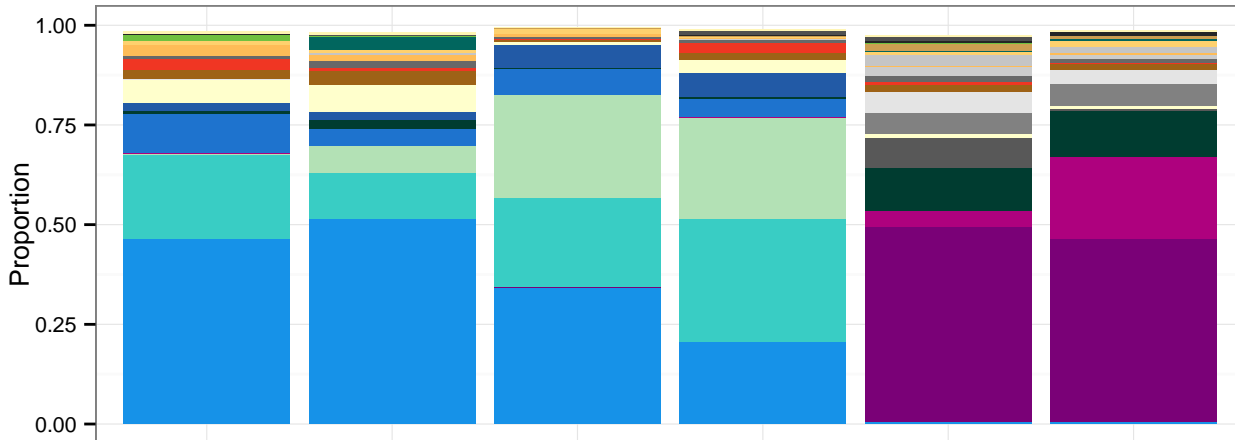

## Mother Vagina

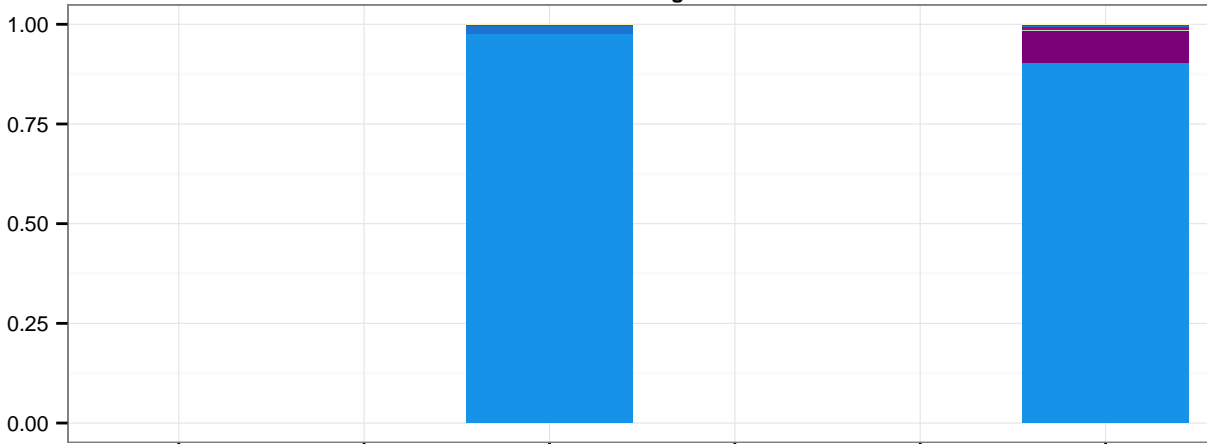

Menarche

### Menarche status

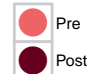

Genital

### Tanner stage

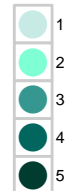

Breast

1 2 3 4 5 6 Visit

# Subject 116: Black, non-Hispanic, 11.2 y/o at enrollment

## Girl Vagina

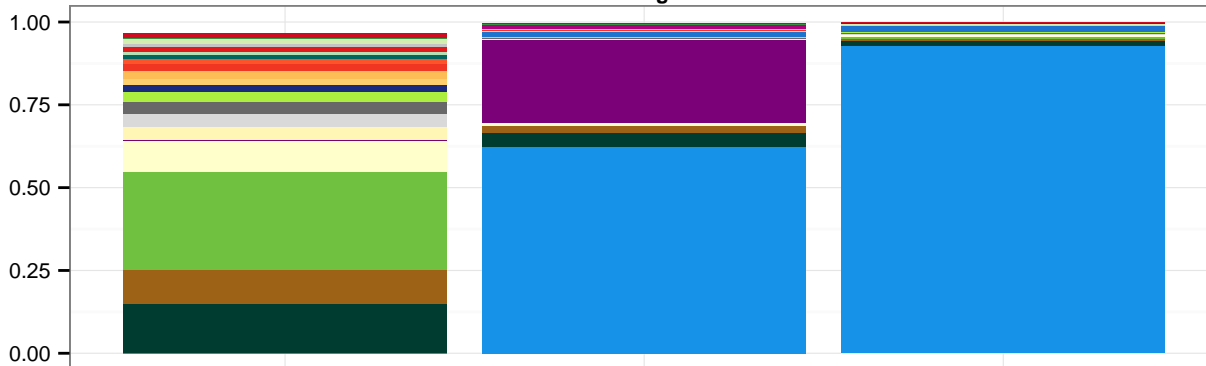

## Girl Vulva

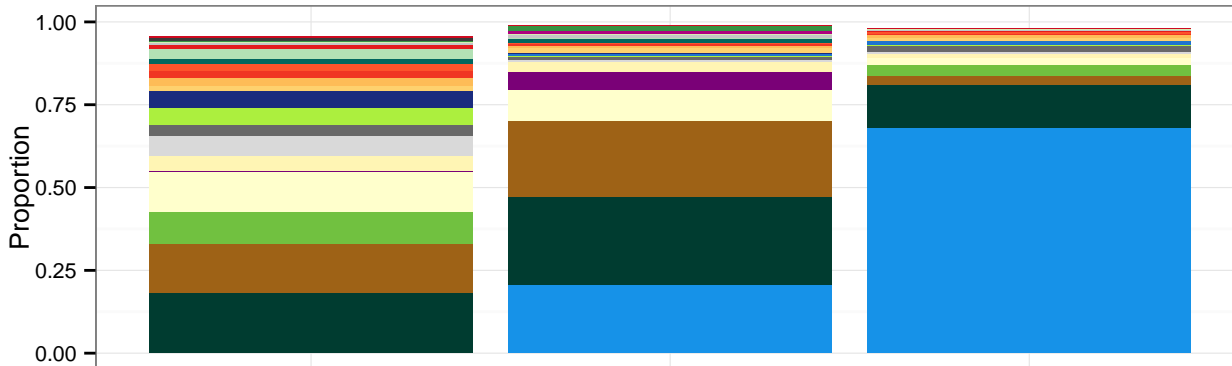

## Mother Vagina

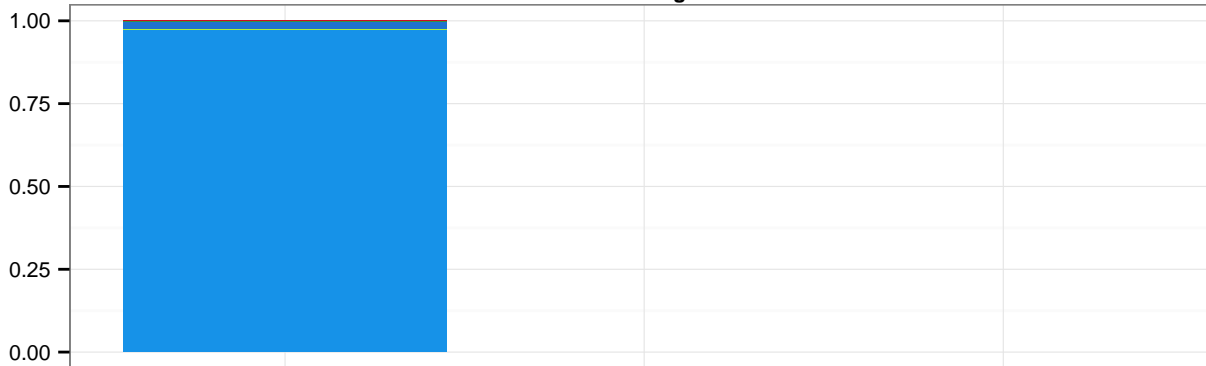

### Taxon

- Lactobacillus\_iners
- Prevootella
- Peptoniphilus
- Corynebacterium
- Anaerococcus
- Gardnerella\_vaginalis
- Anaerosphaera
- Campylobacter
- Other\_Bacteria
- Arcanobacterium
- Lactobacillus\_Other
- Streptococcus\_anginosis
- Clostridiales
- Clostridiales\_Incertae\_Sedis\_XI
- Finegoldia
- Fastidiosipila
- Porphyromonas
- Lactobacillus\_crispatus
- Gallicola
- Dialister
- Facklamia
- Gardnerella\_Other
- Mobiluncus
- Ureaplasma
- Helcococcus

Menarche

### Menarche status

- Pre
- Post

Genital

### Tanner stage

- 1
- 2
- 3
- 4
- 5

Breast

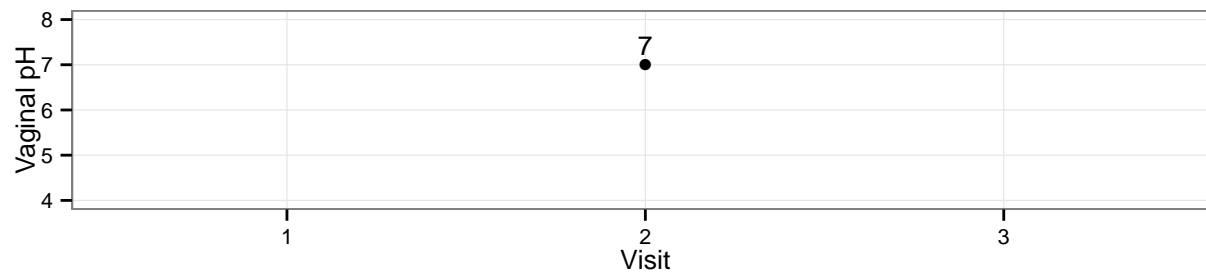



# Subject 118: Caucasian, non-Hispanic, 11.3 y/o at enrollment

Girl Vagina

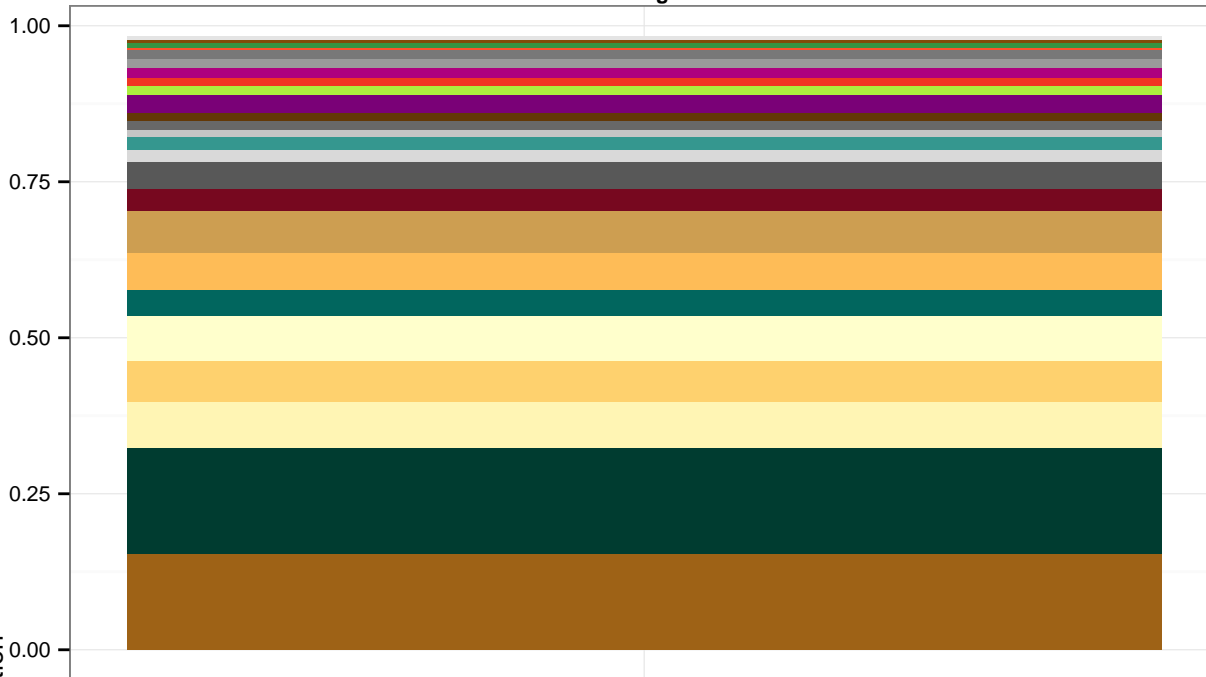

- Taxon**
- Peptoniphilus
  - Prevotella
  - Anaerospaera
  - Clostridiales
  - Anaerococcus
  - Porphyromonas
  - Clostridiales\_Incertae\_Sedis\_XI
  - Ruminococcaceae
  - Moryella
  - Sneathia
  - Campylobacter
  - Porphyromonadaceae
  - Dialister
  - Other\_Bacteria
  - Parvimonas
  - Gardnerella\_vaginalis
  - Arcanobacterium
  - Finegoldia
  - Gardnerella\_Other
  - Gordonibacter
  - Mycoplasma
  - Fastidiosipila
  - Mobiluncus
  - Peptococcus
  - Atopobium

Girl Vulva

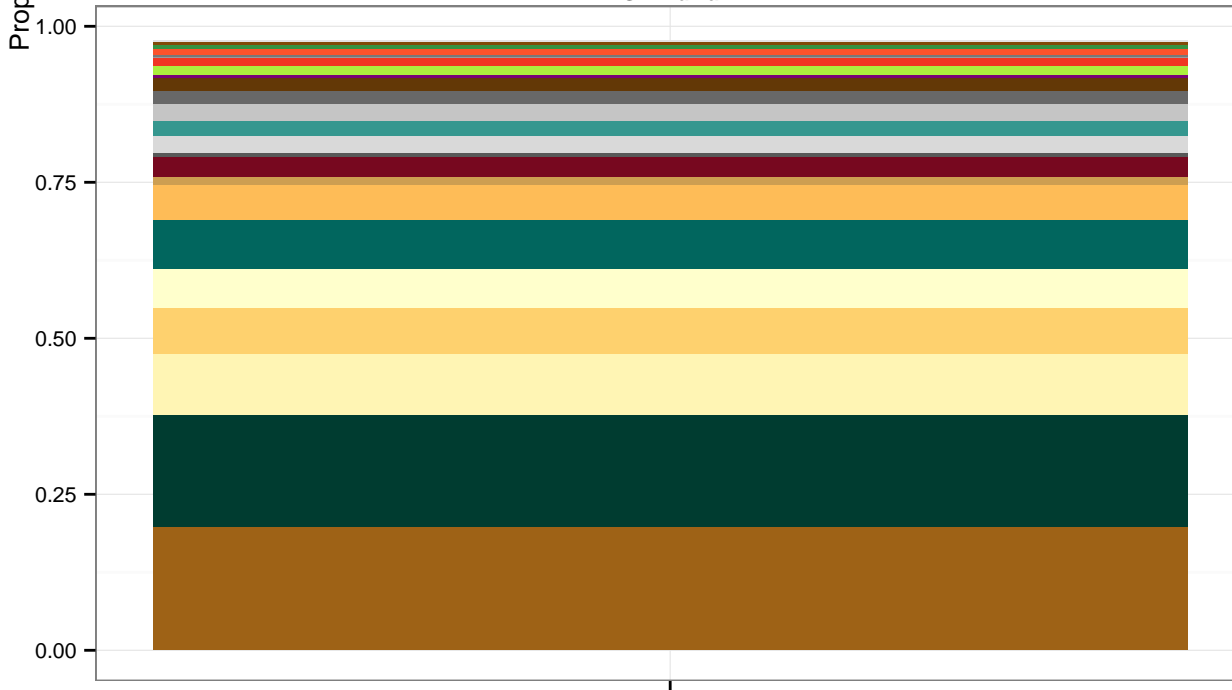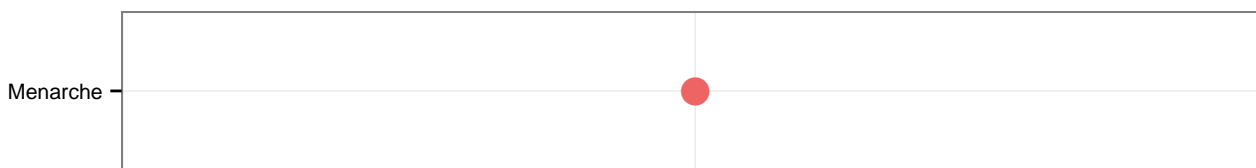

- Menarche status**
- Pre
  - Post

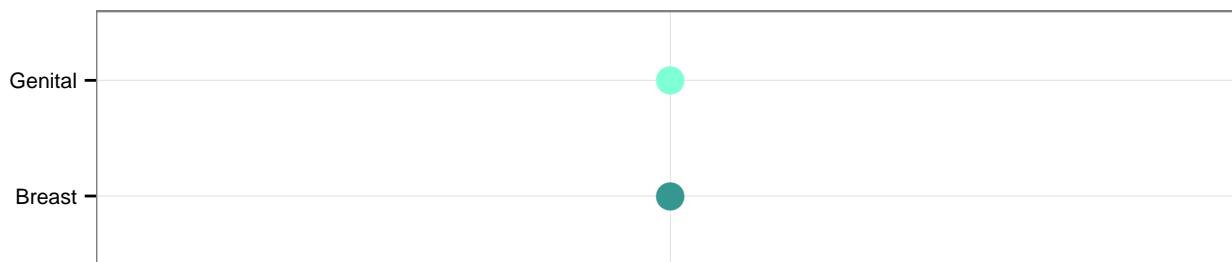

- Tanner stage**
- 1
  - 2
  - 3
  - 4
  - 5

1 Visit

# Subject 120: Black, non-Hispanic, 12 y/o at enrollment

## Girl Vagina

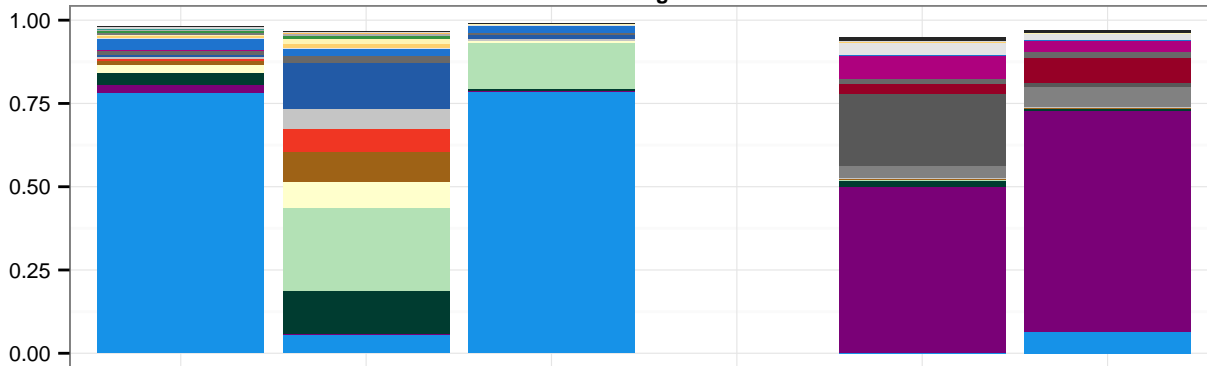

## Girl Vulva

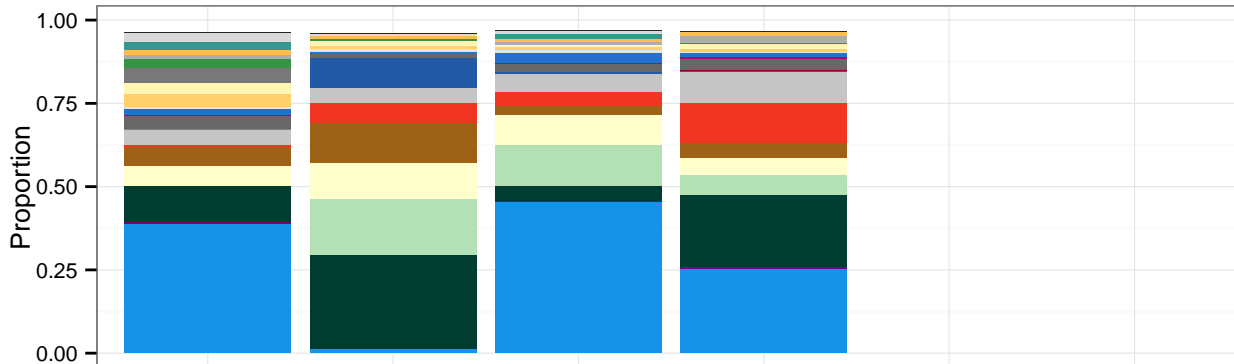

## Mother Vagina

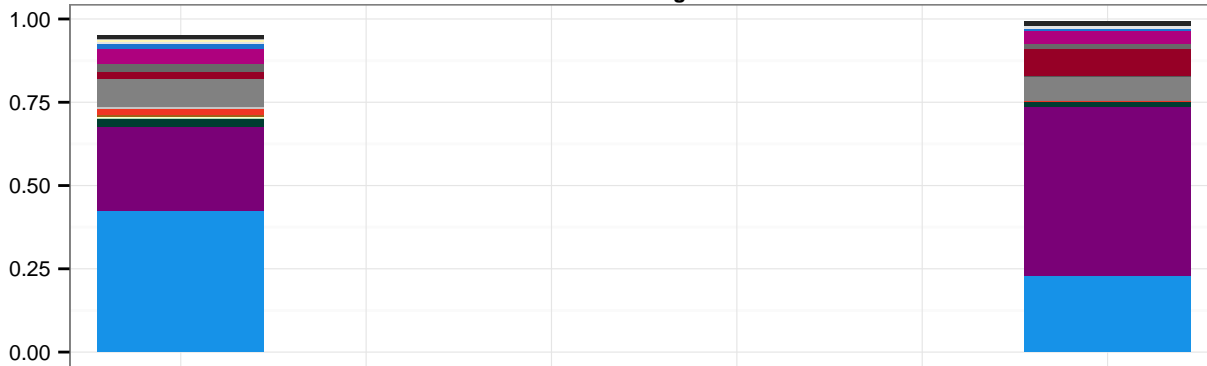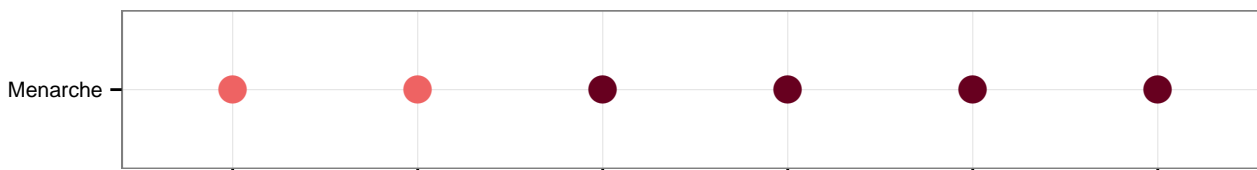

### Menarche status

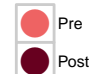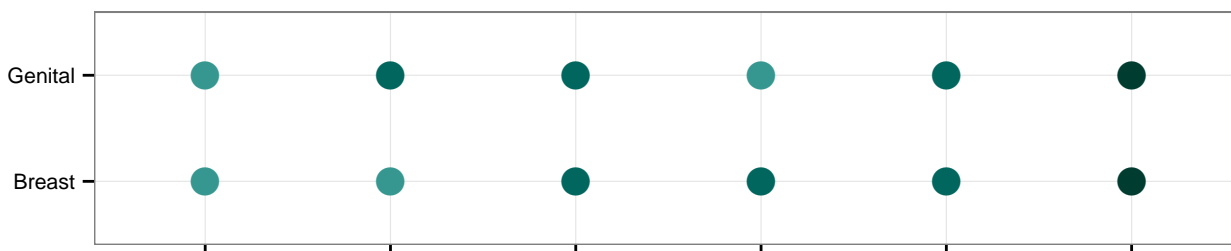

### Tanner stage

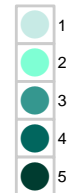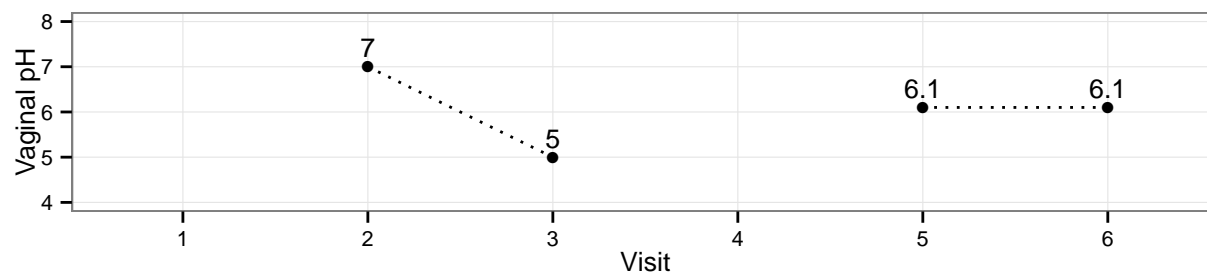

Visit

# Subject 121: Black, non-Hispanic, 10.1 y/o at enrollment

## Girl Vagina

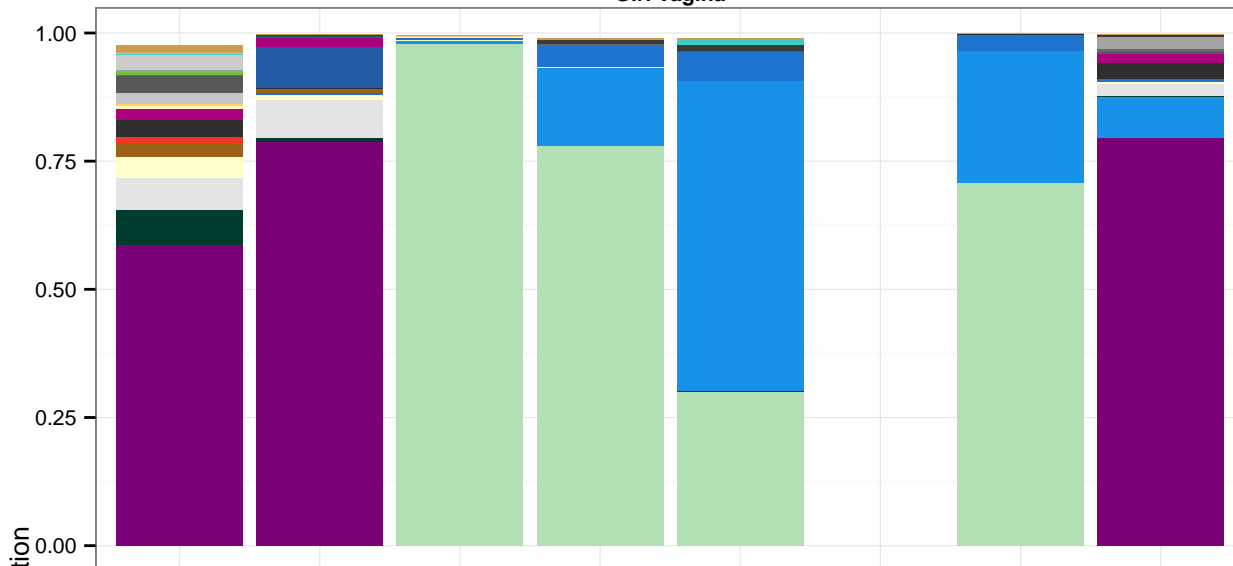

## Girl Vulva

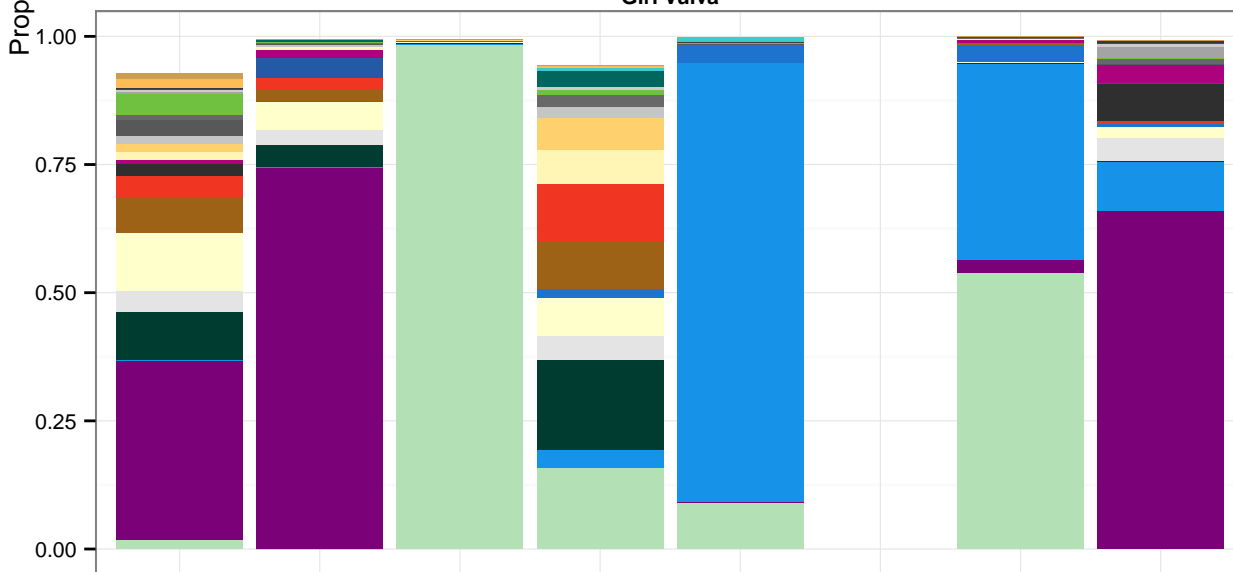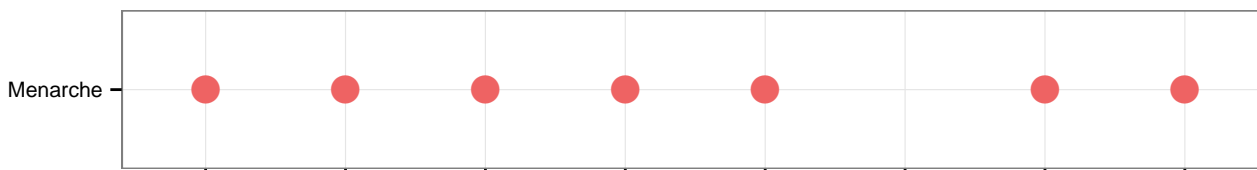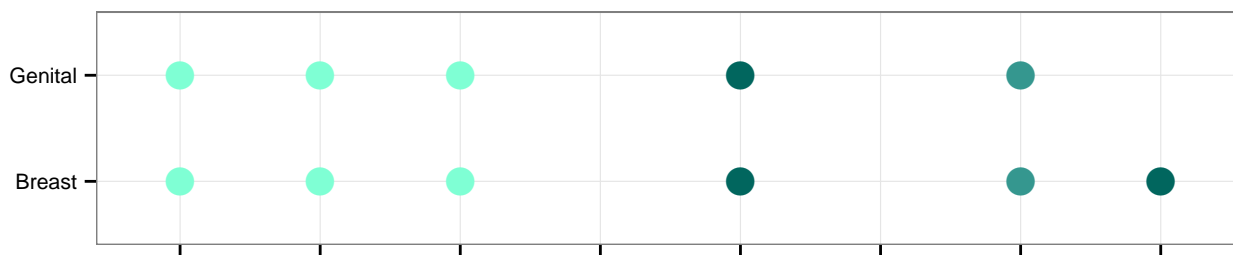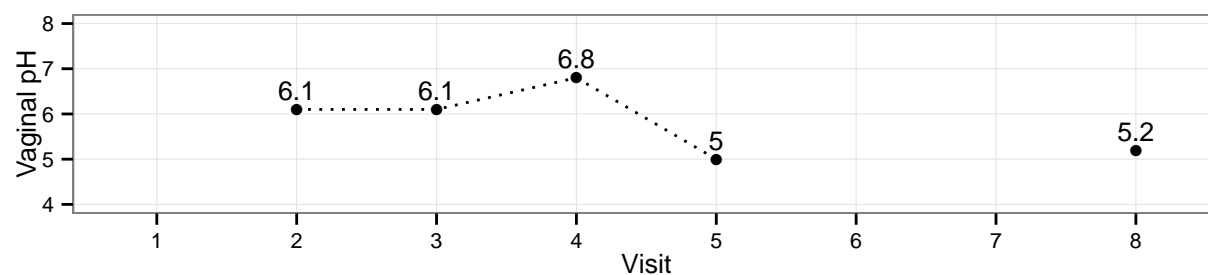

# Subject 123: Black, non-Hispanic, 10.1 y/o at enrollment

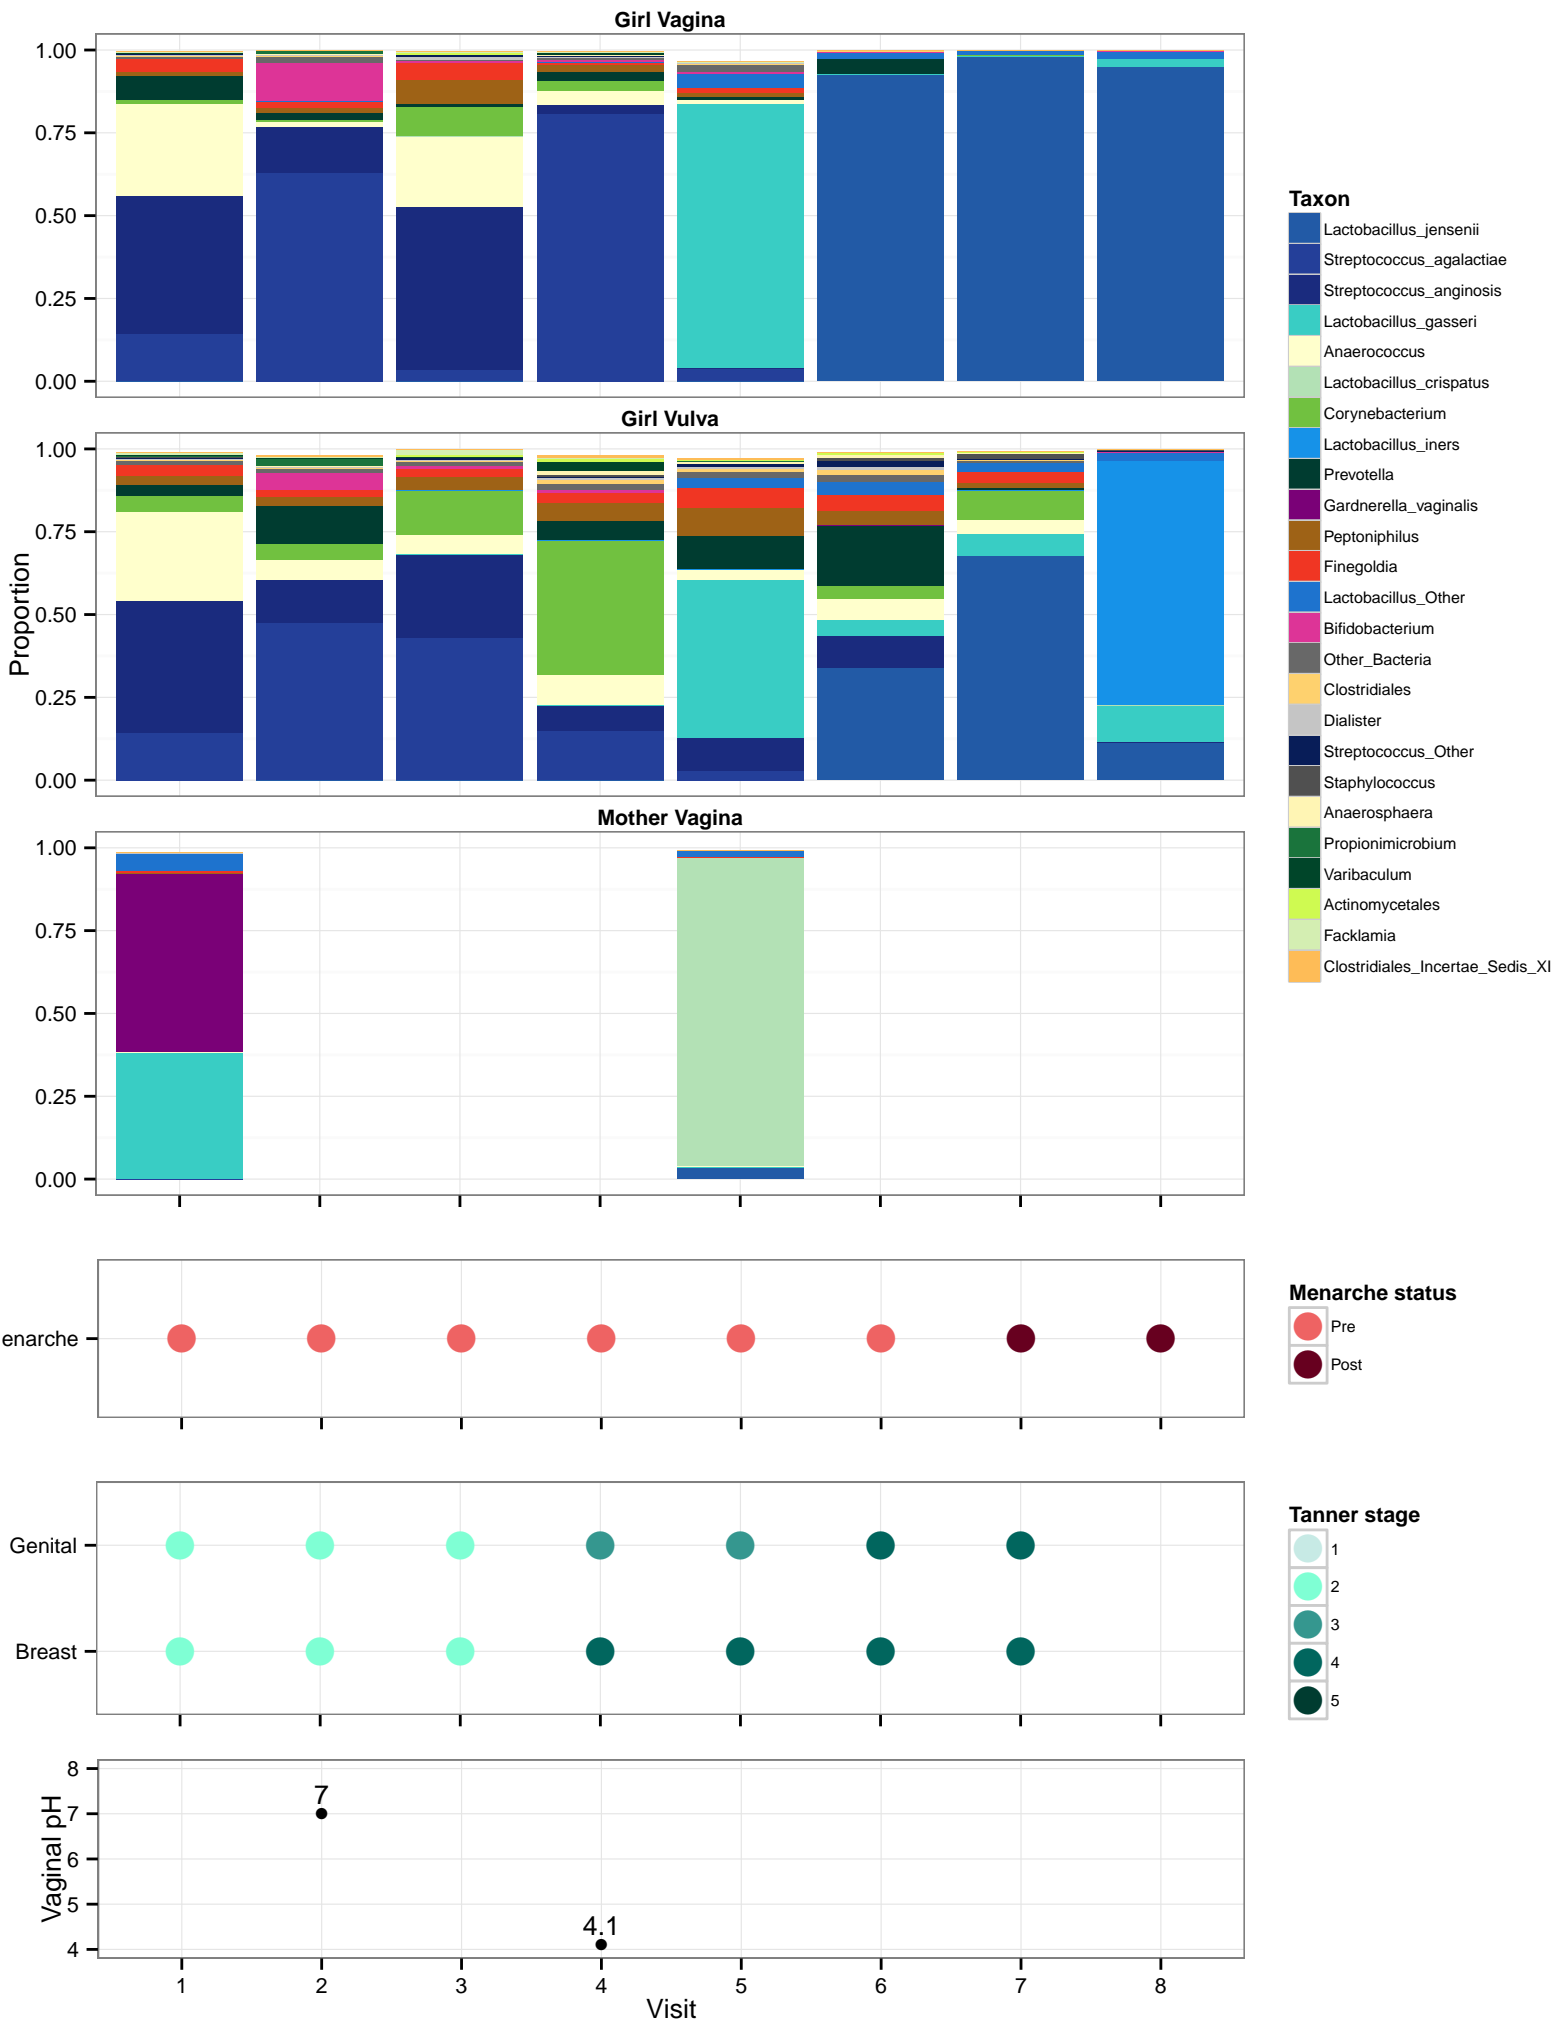

# Subject 124: Black, non-Hispanic, 10.1 y/o at enrollment

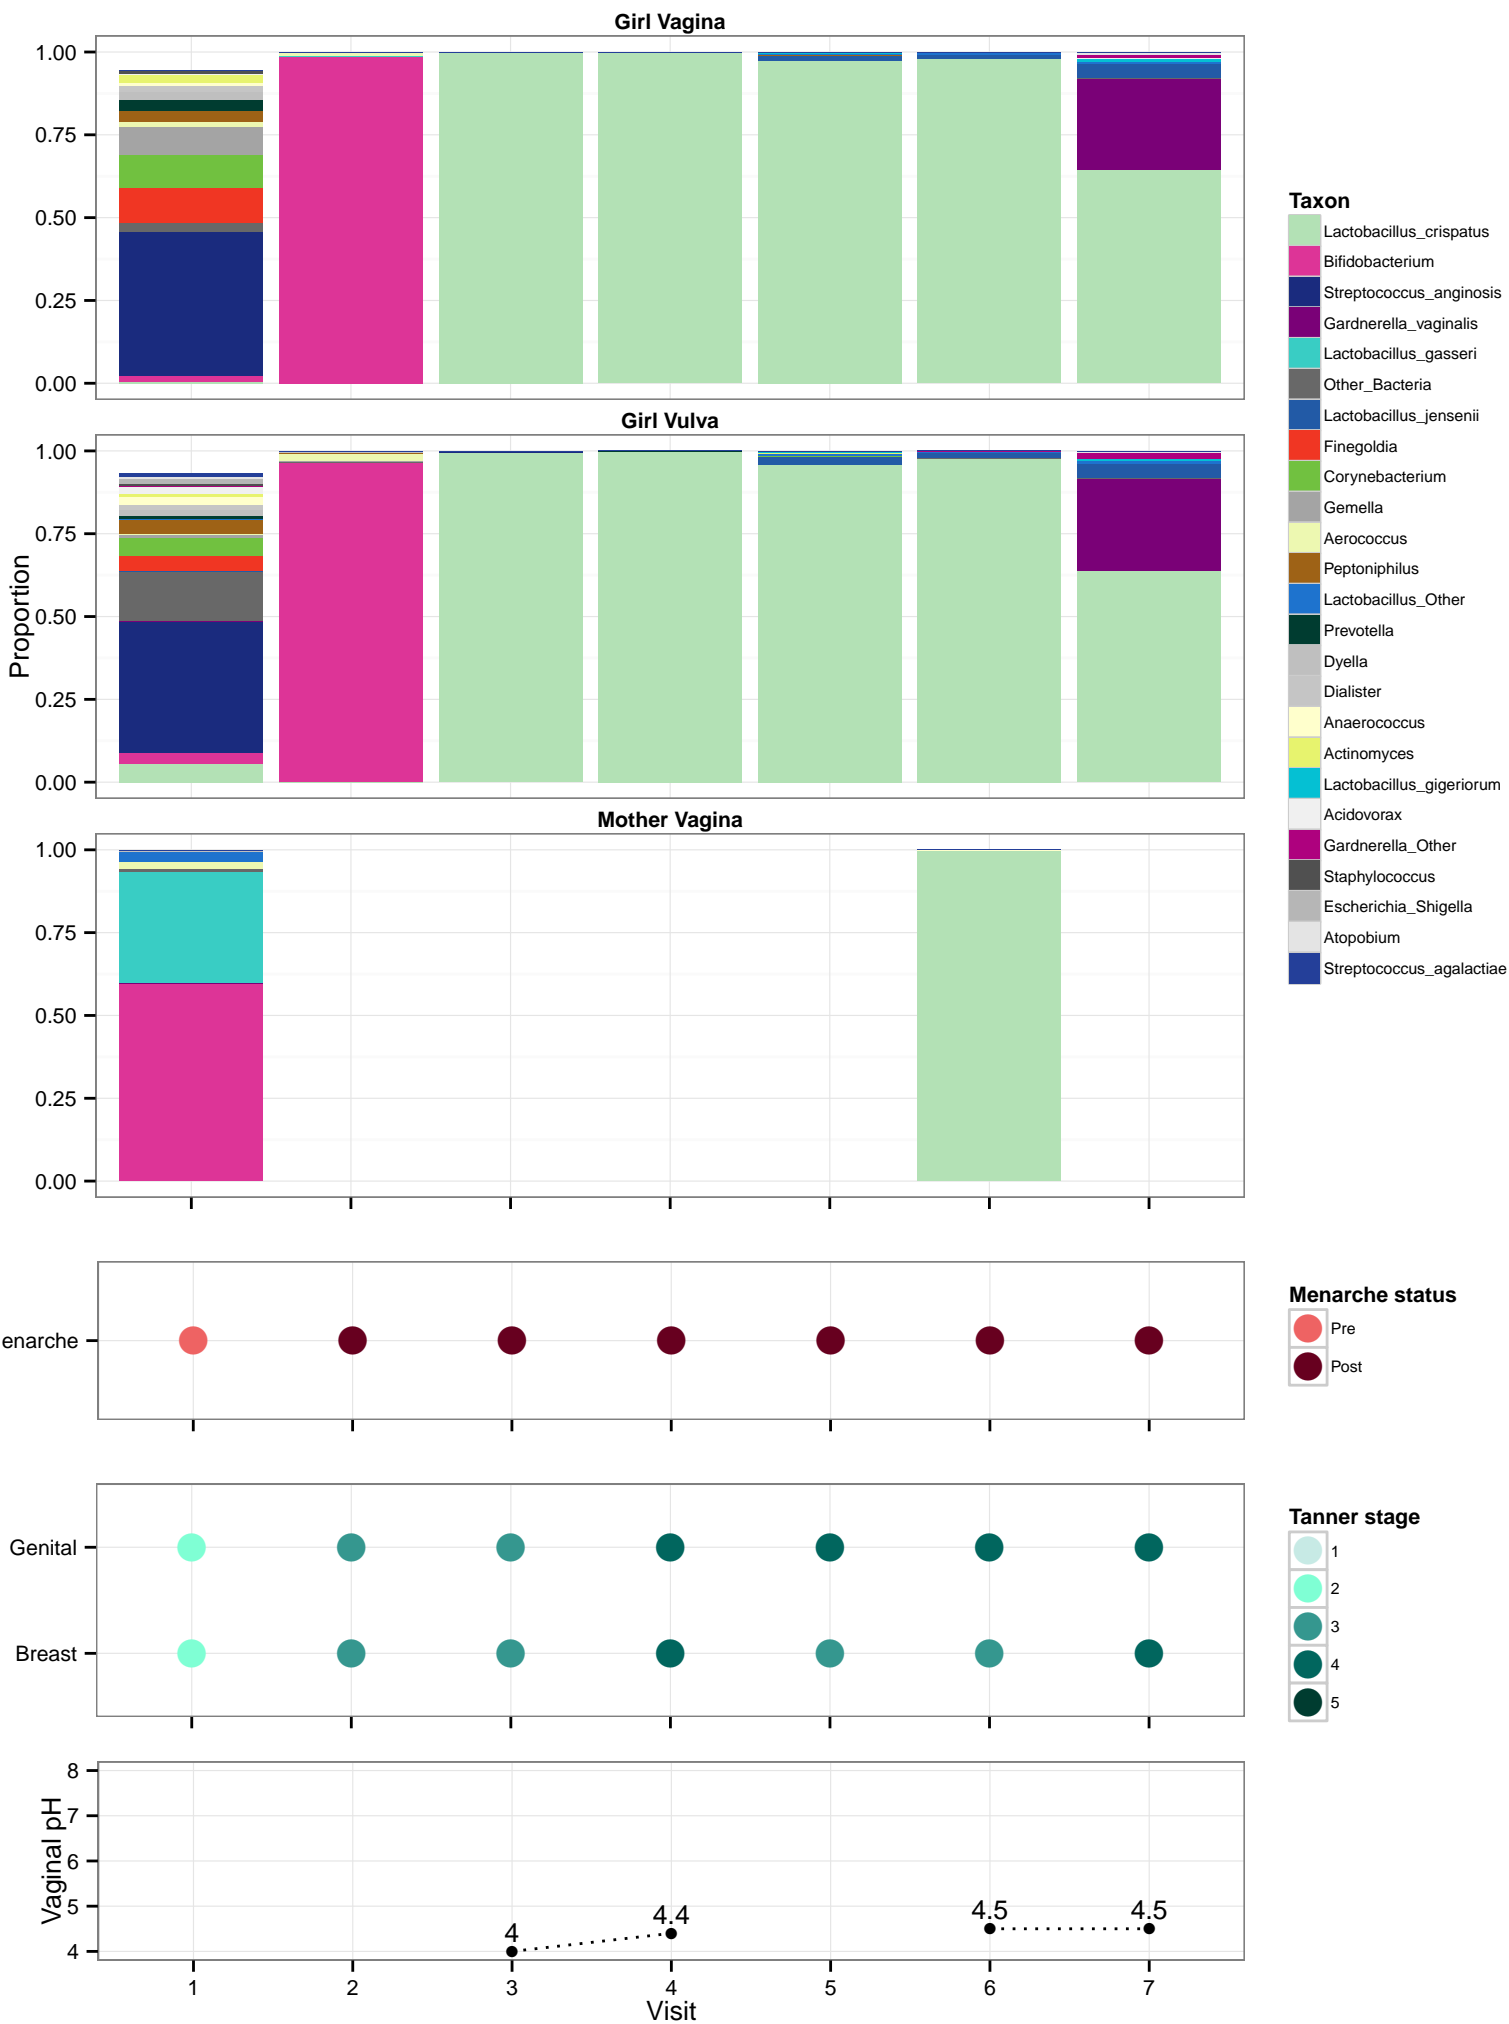

# Subject 125: Caucasian, non-Hispanic, 10.9 y/o at enrollment

## Girl Vagina

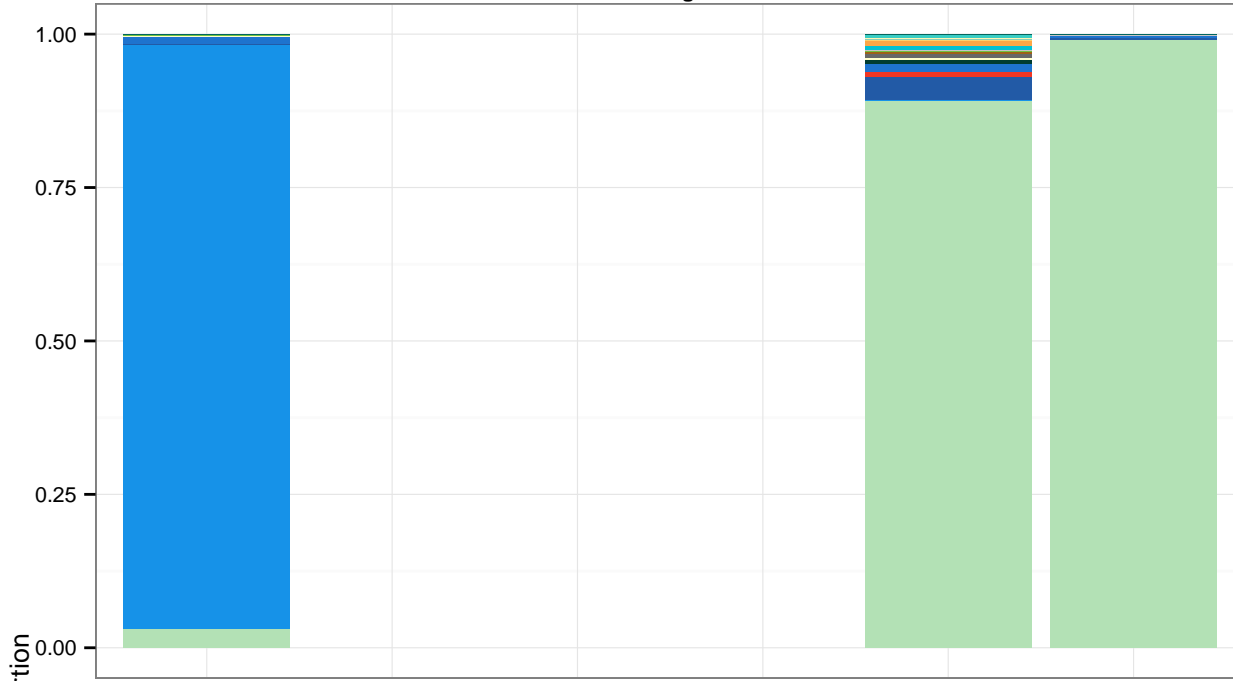

## Girl Vulva

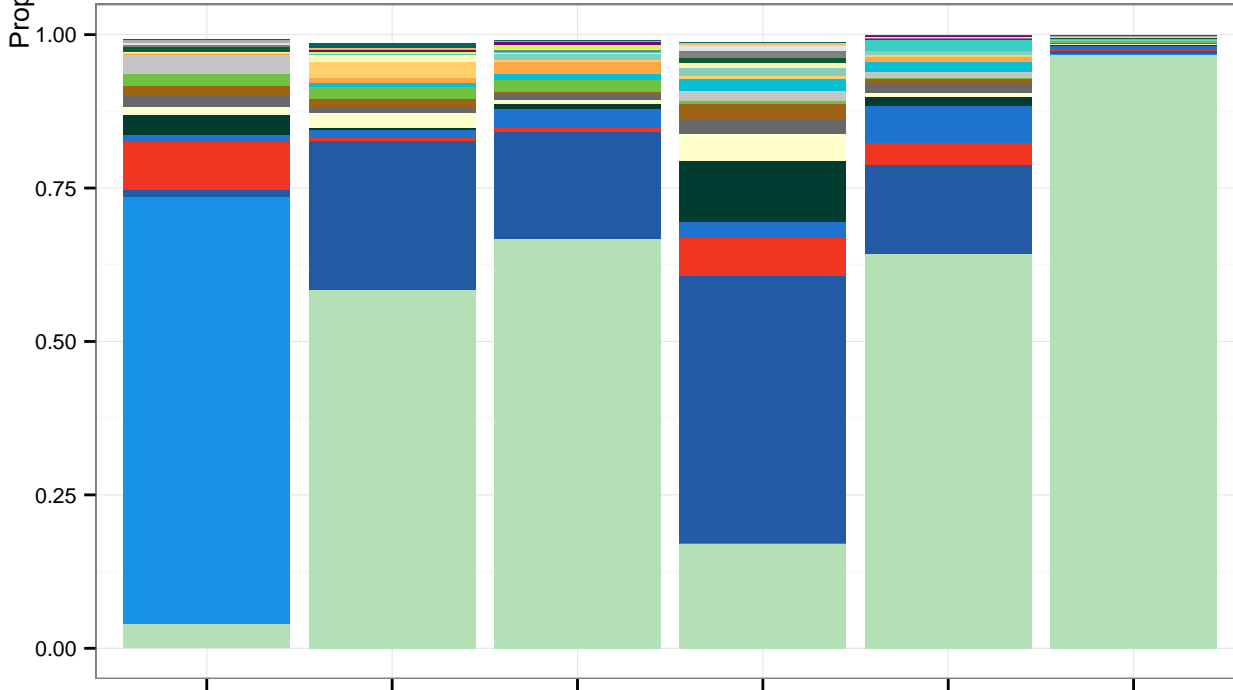

### Taxon

- Lactobacillus\_crispatus
- Lactobacillus\_iners
- Lactobacillus\_jensenii
- Finegoldia
- Lactobacillus\_Other
- Prevotella
- Anaerococcus
- Other\_Bacteria
- Peptoniphilus
- Corynebacterium
- Dialister
- Lactobacillus\_gigeriorum
- Clostridium\_sensu\_stricto
- Clostridiales
- Lactobacillus\_coleohominis
- Anaerospaera
- Lactobacillus\_gasseri
- Segniliparus
- Megaspasphaera
- Atopobium
- Actinomycetales
- Gardnerella\_vaginalis
- Fusobacterium
- Clostridiales\_Incertae\_Sedis\_XI
- Porphyromonas

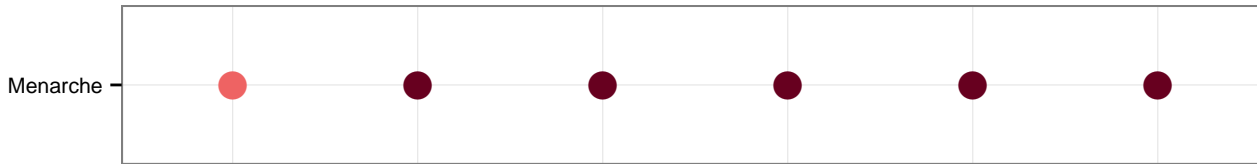

### Menarche status

- Pre
- Post

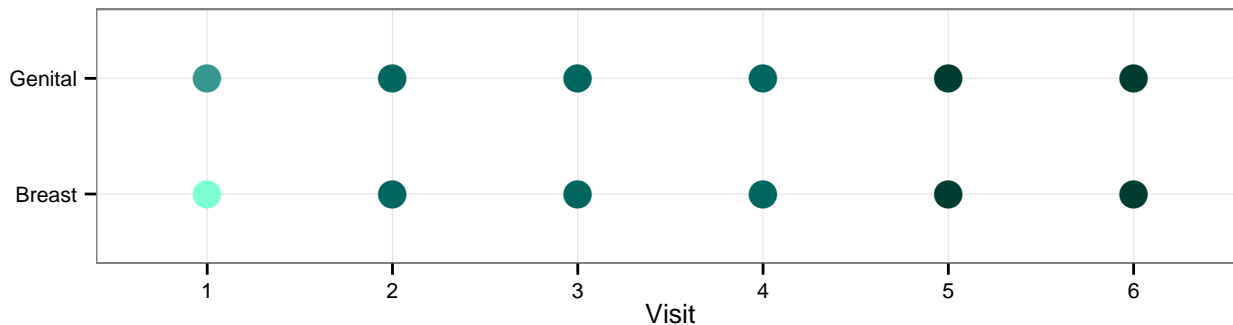

### Tanner stage

- 1
- 2
- 3
- 4
- 5

Visit

# Subject 126: Caucasian, non-Hispanic, 10.6 y/o at enrollment

## Girl Vagina

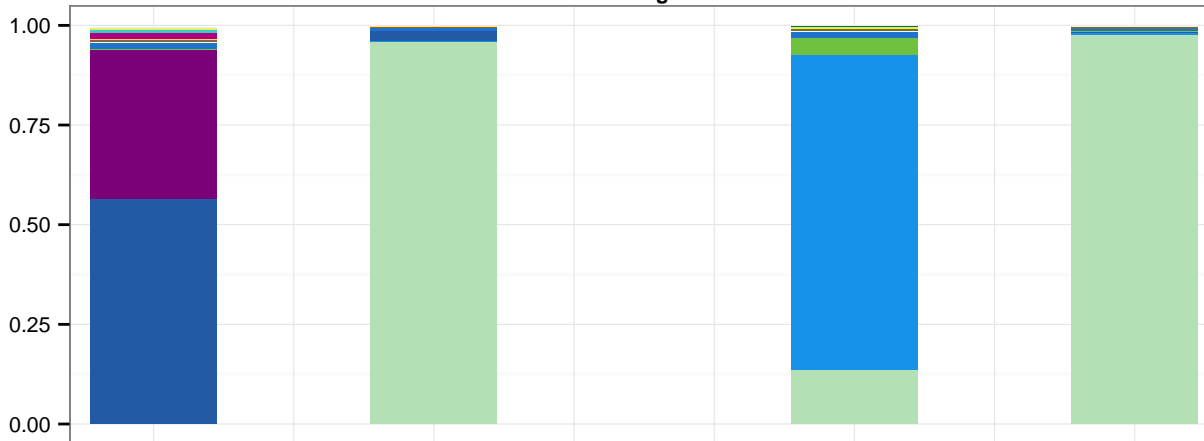

## Girl Vulva

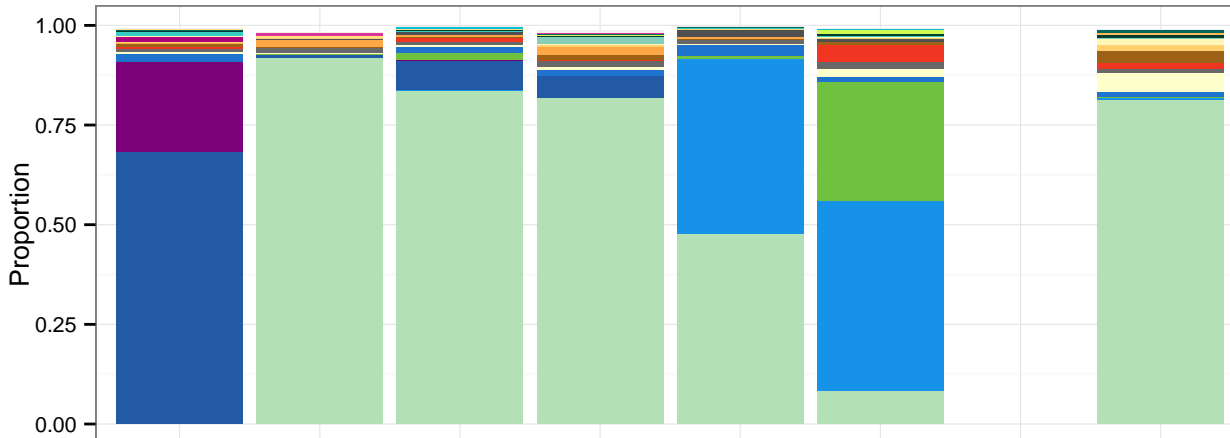

## Mother Vagina

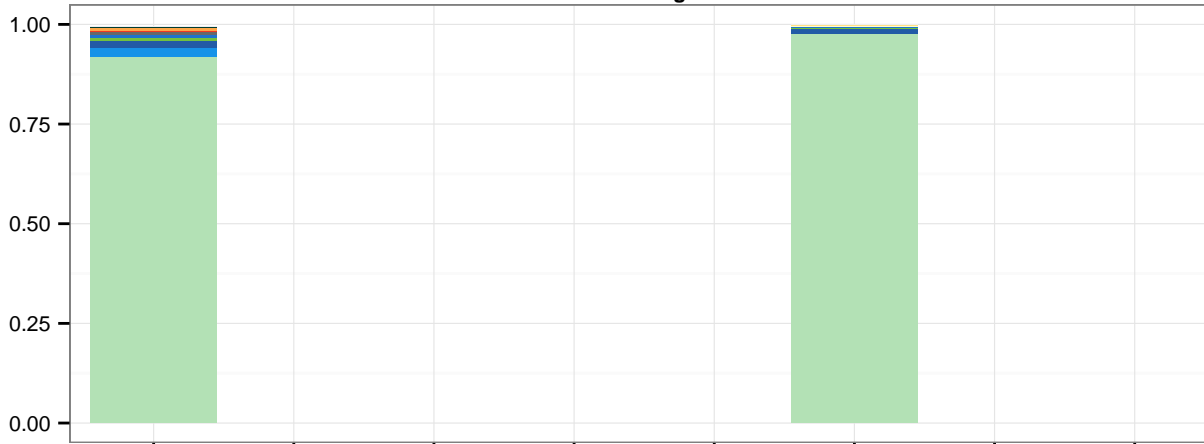

### Taxon

- Lactobacillus\_crispatus
- Lactobacillus\_iners
- Lactobacillus\_jensenii
- Gardnerella\_vaginalis
- Corynebacterium
- Lactobacillus\_Other
- Anaerococcus
- Other\_Bacteria
- Finnegoldia
- Peptoniphilus
- Clostridium\_sensu\_stricto
- Staphylococcus
- Clostridiales
- Gardnerella\_Other
- Anaerosphaera
- Lactobacillus\_coleohominis
- Lactobacillus\_gasseri
- Prevotella
- Actinomycetales
- Clostridiales\_Incertae\_Sedis\_XI
- Porphyromonas
- Blautia
- Lactobacillus\_gigeriorum
- Bifidobacterium
- Acidovorax

Menarche

### Menarche status

- Pre
- Post

Genital

Breast

### Tanner stage

- 1
- 2
- 3
- 4
- 5

1

2

3

4

5

6

7

8

Visit

# Subject 127: Native American, non-Hispanic, 12.1 y/o at enrollment

## Girl Vagina

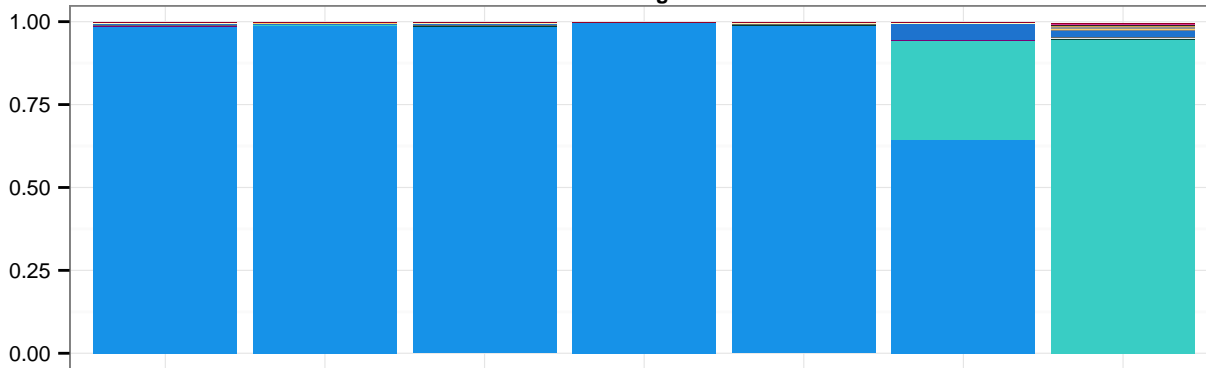

## Girl Vulva

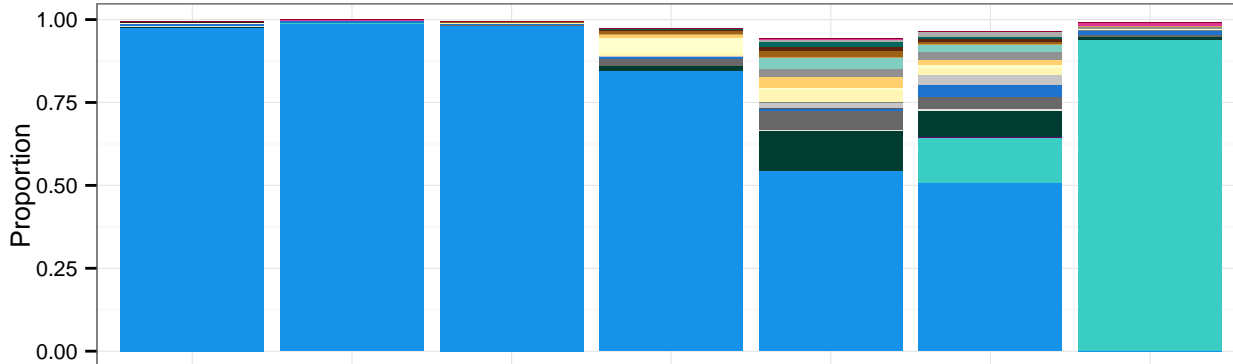

## Mother Vagina

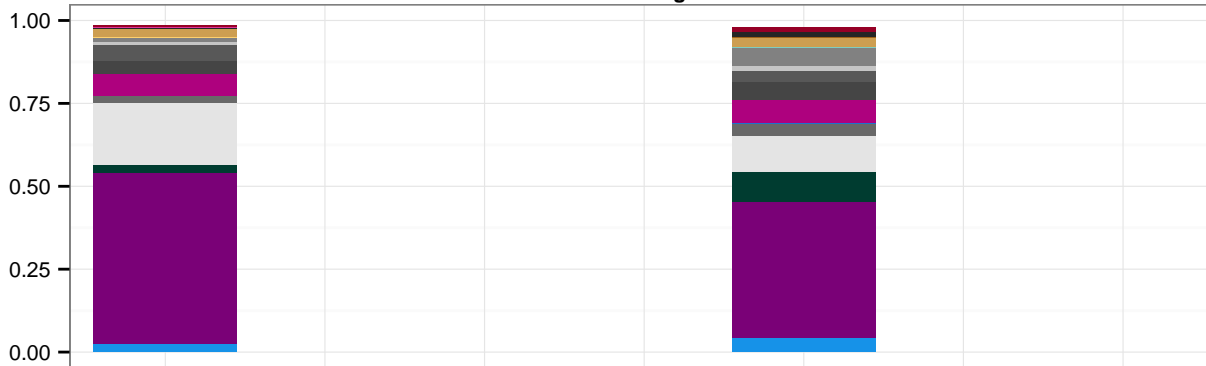

### Taxon

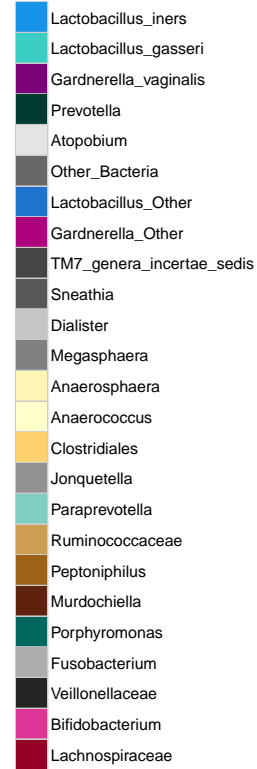

### Menarche status

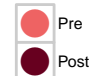

### Tanner stage

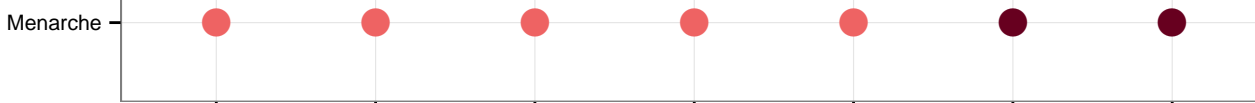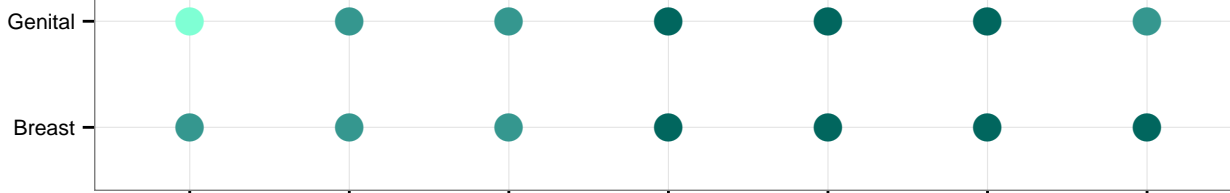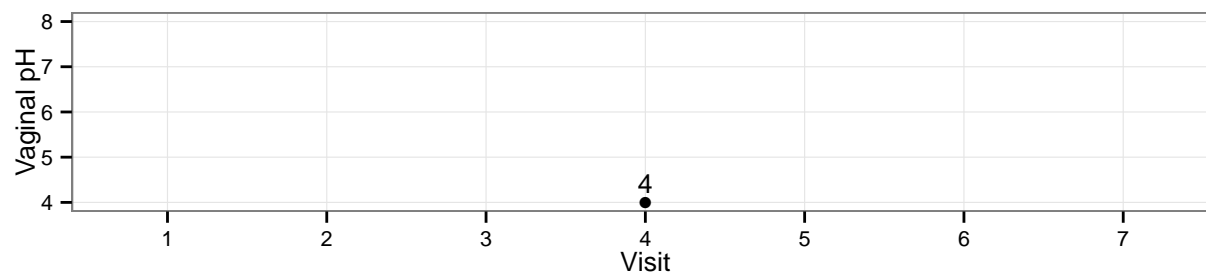



# Subject 128: Native American, non-Hispanic, 11 y/o at enrollment

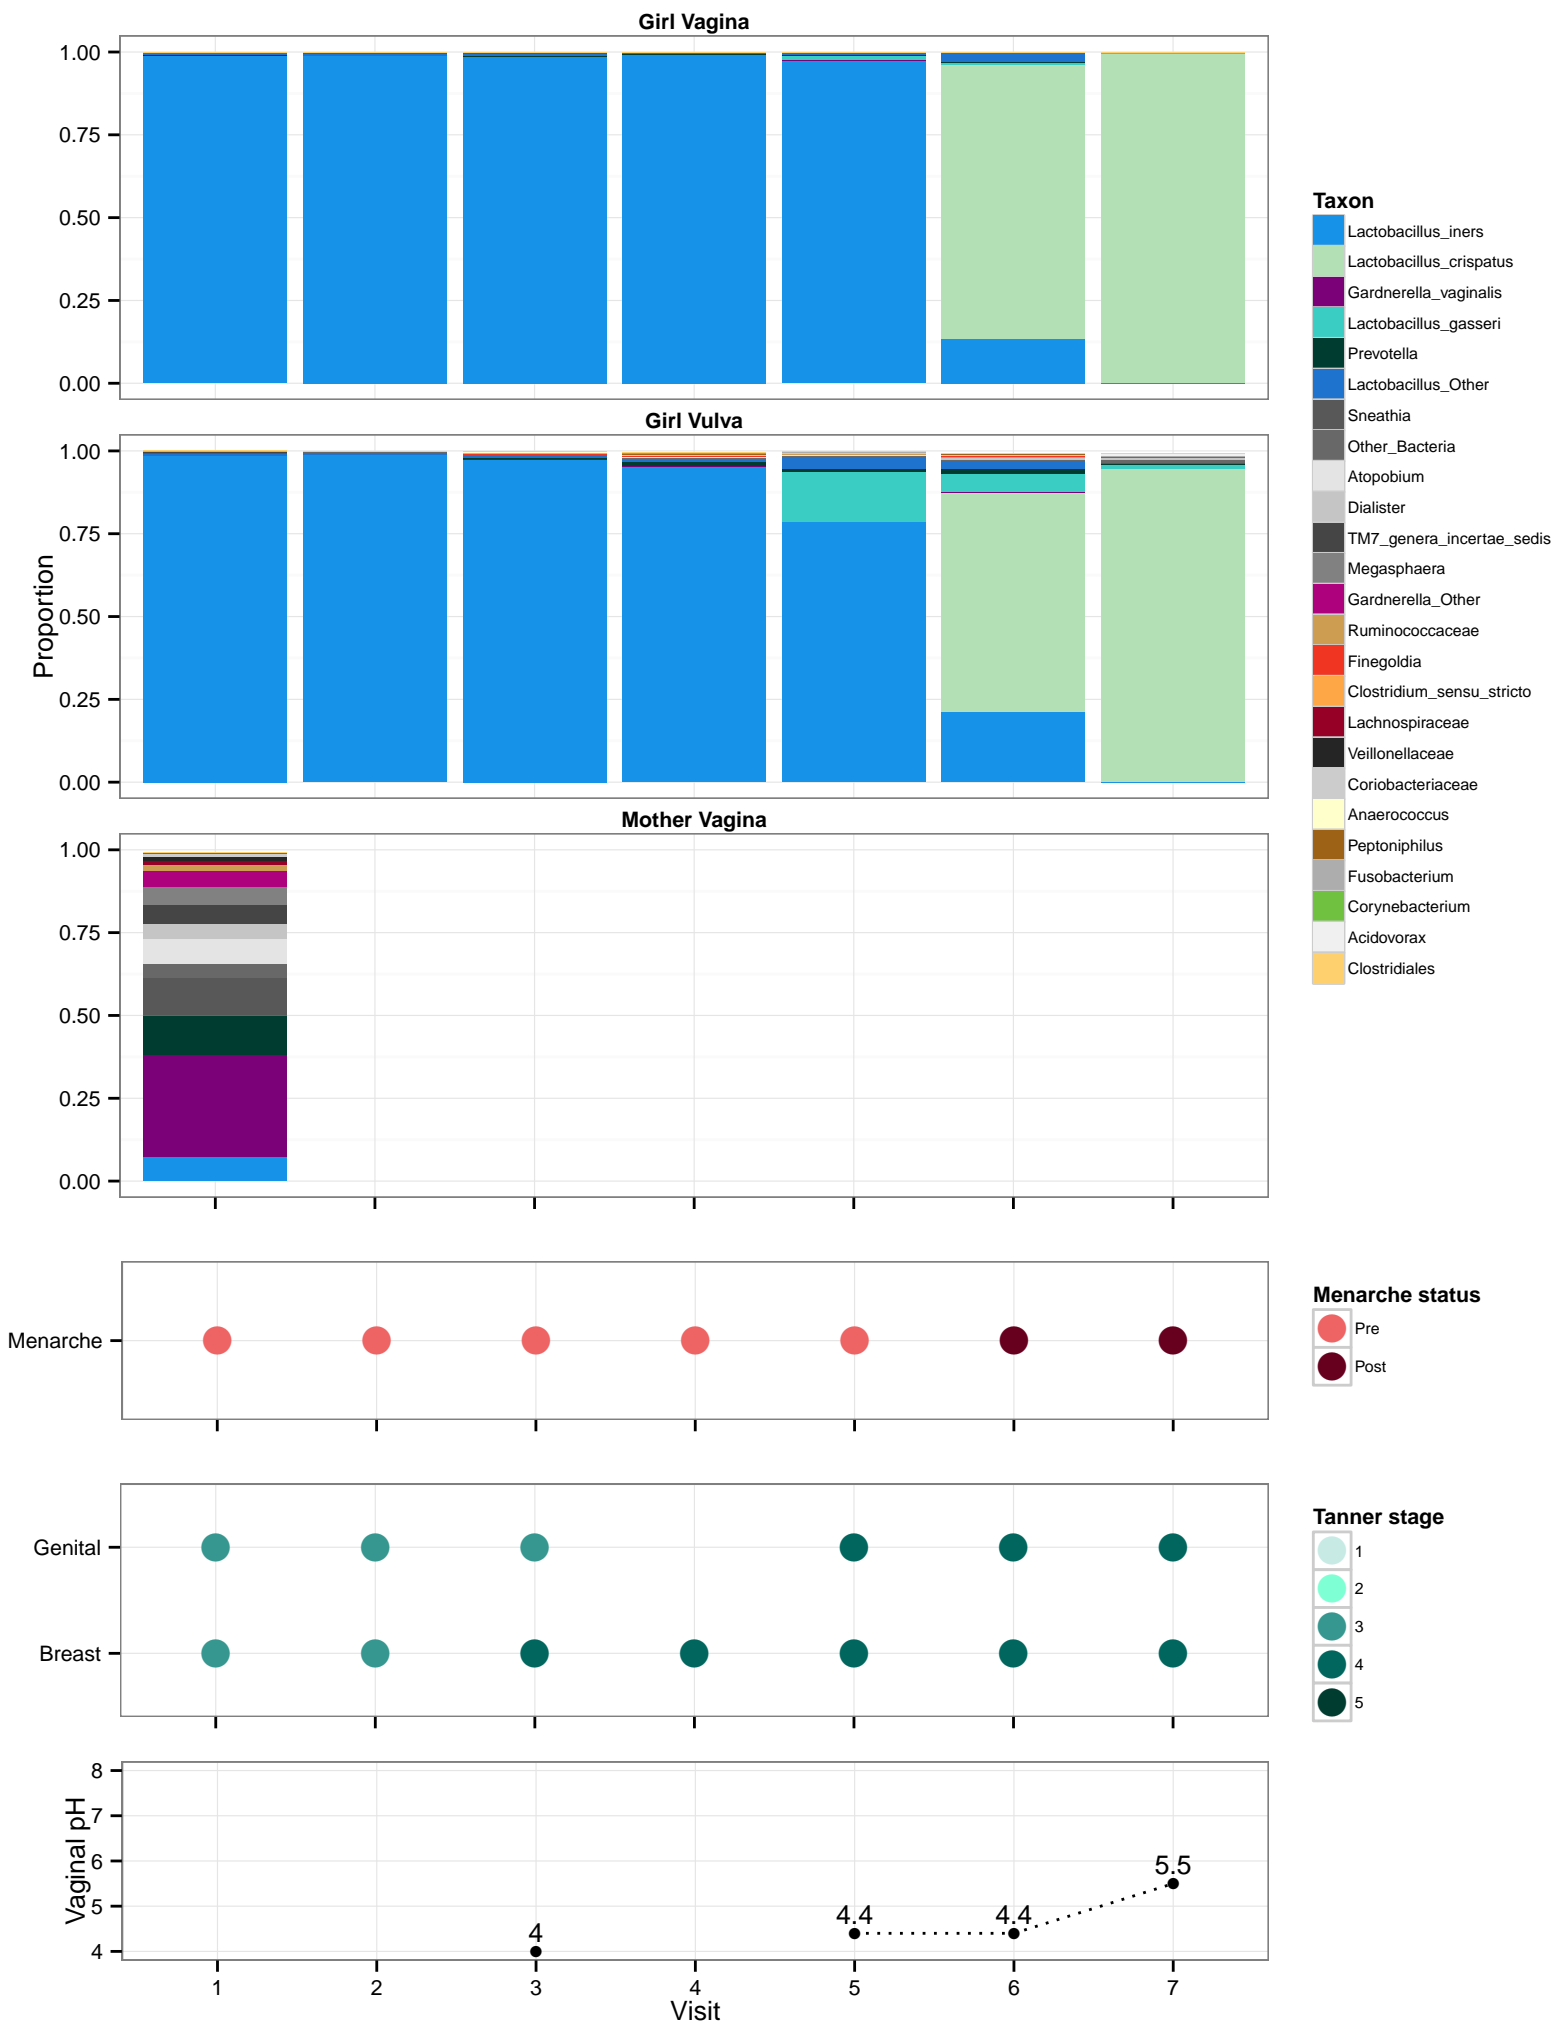

# Subject 129: Caucasian, non-Hispanic, 10.6 y/o at enrollment

Girl Vagina

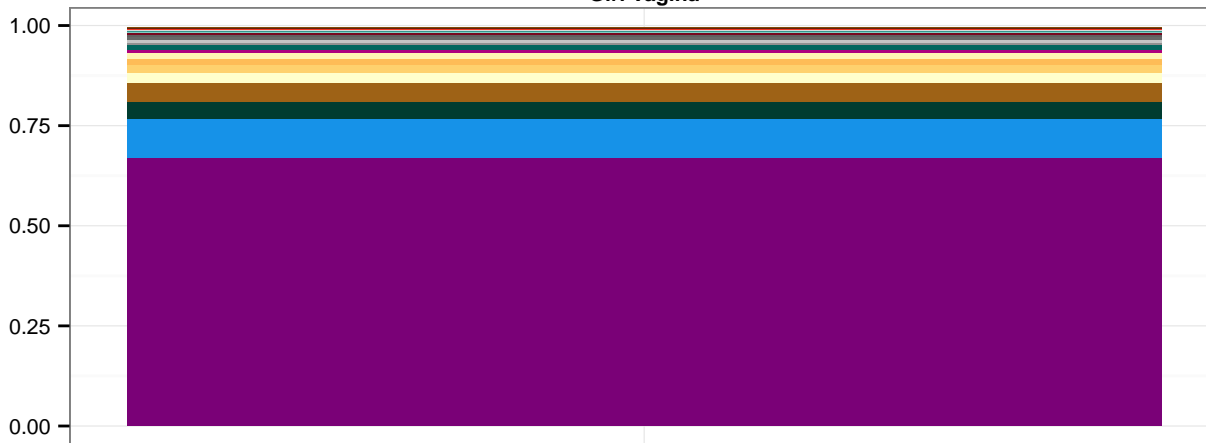

Girl Vulva

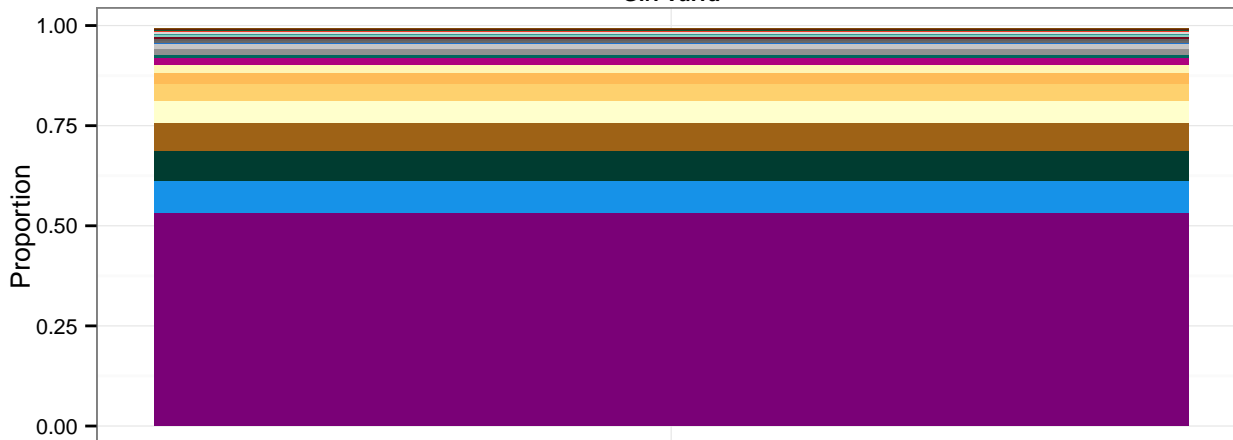

Mother Vagina

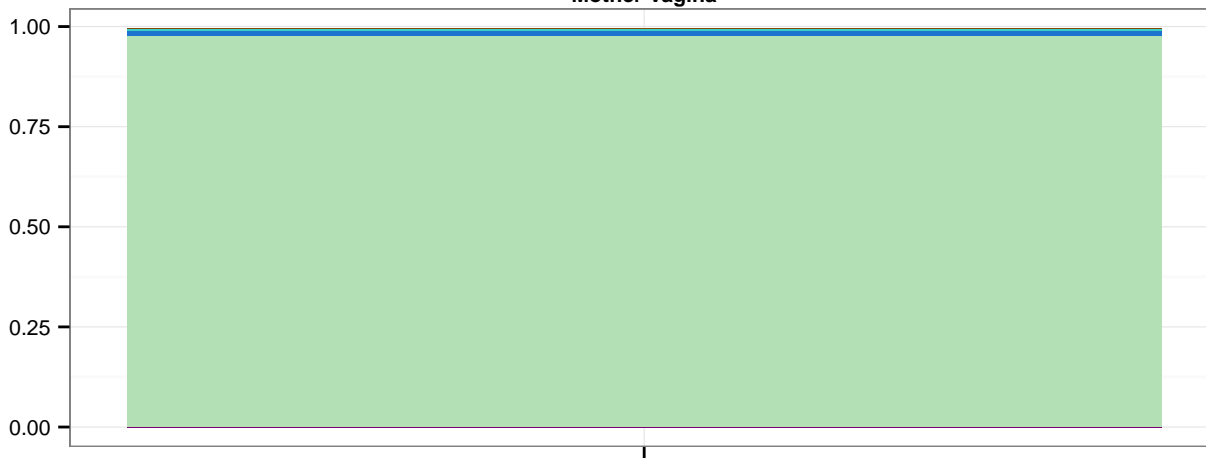

## Taxon

- Gardnerella\_vaginalis
- Lactobacillus\_crispatus
- Lactobacillus\_iners
- Prevotella
- Peptoniphilus
- Anaerococcus
- Clostridiales
- Clostridiales\_Incertae\_Sedis\_XI
- Anaerosphaera
- Gardnerella\_Other
- Porphyromonas
- Jonquetella
- Dialister
- Lactobacillus\_Other
- Other\_Bacteria
- Pyramidobacter
- Moryella
- Paraprevotella
- Porphyromonadaceae
- Campylobacter
- Lactobacillus\_gasseri
- Fingoldia
- Segniliparus
- Murdochiella
- Peptococcus

## Menarche status

- Pre
- Post

## Tanner stage

- 1
- 2
- 3
- 4
- 5

Menarche

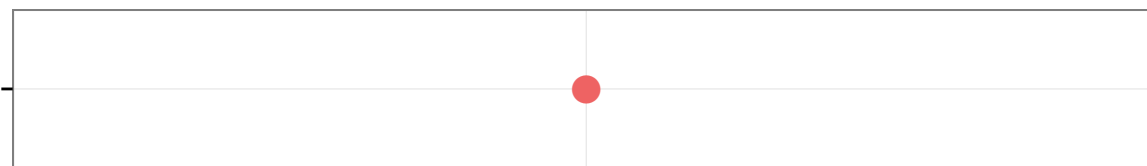

Genital

Breast

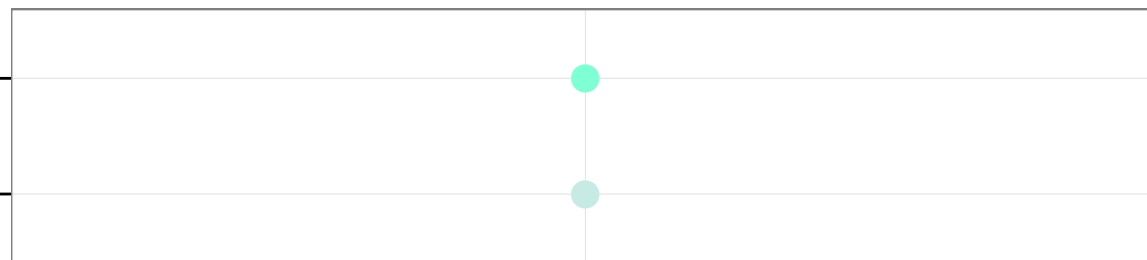

1  
Visit

# Subject 132: Black, non-Hispanic, 10.2 y/o at enrollment

## Girl Vagina

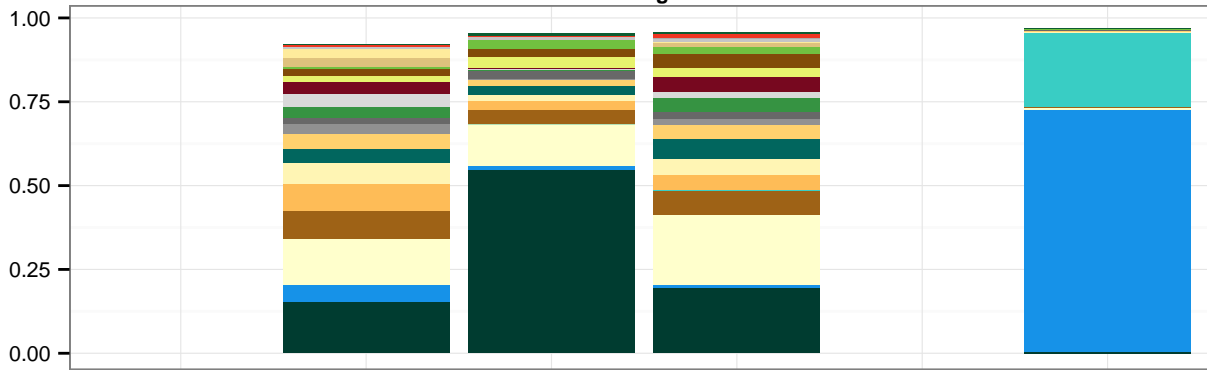

## Girl Vulva

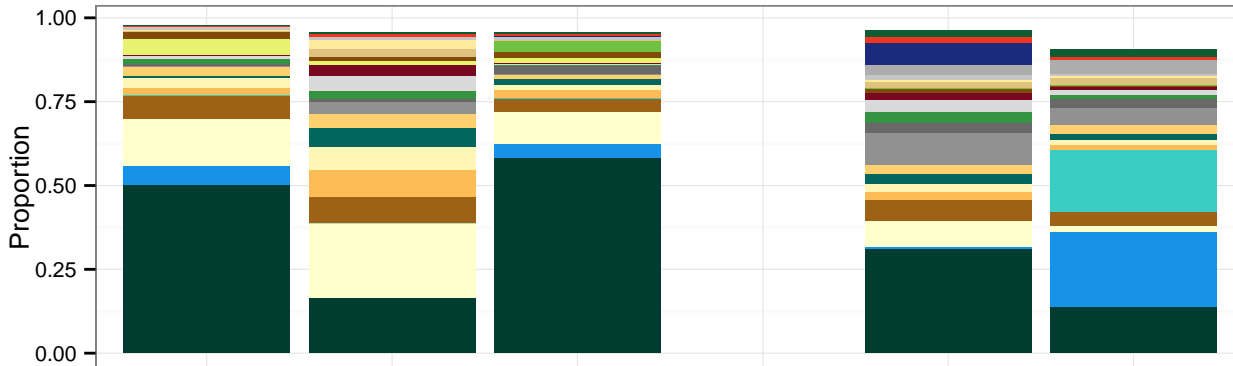

## Mother Vagina

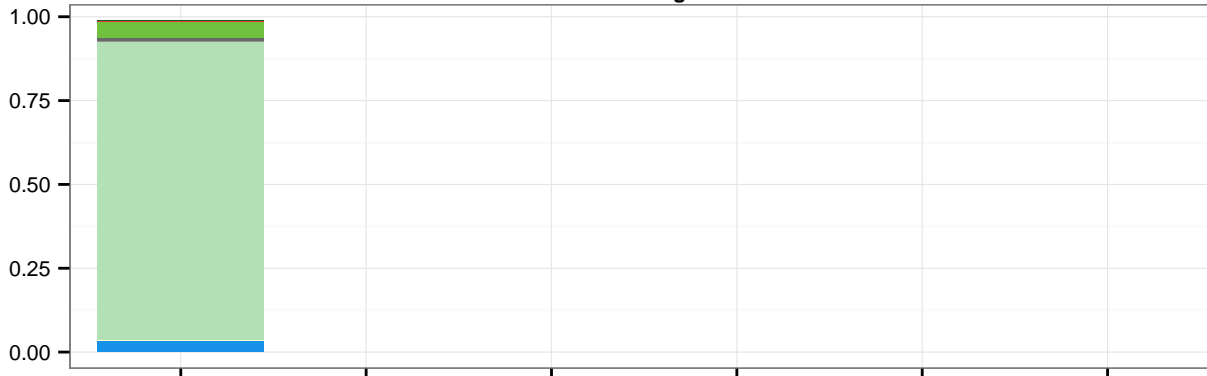

### Taxon

- Prevotella
- Lactobacillus\_iners
- Anaerococcus
- Lactobacillus\_crispatus
- Peptoniphilus
- Lactobacillus\_gasseri
- Clostridiales\_Incertae\_Sedis\_XI
- Anaerosphaera
- Porphyromonas
- Clostridiales
- Jonquetella
- Other\_Bacteria
- Mobiluncus
- Campylobacter
- Moryella
- Actinomyces
- Peptococcus
- Corynebacterium
- Saccharofermentans
- Anaerovorax
- Dialister
- Fusobacterium
- Streptococcus\_anginosus
- Finegoldia
- Segniliparus

Menarche

### Menarche status

- Pre
- Post

Genital

### Tanner stage

- 1
- 2
- 3
- 4
- 5

Breast

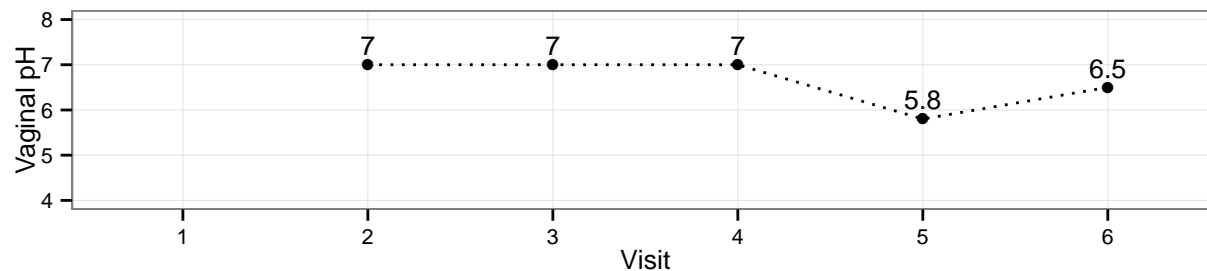

# Subject 133: Black, non-Hispanic, 11.6 y/o at enrollment

## Girl Vagina

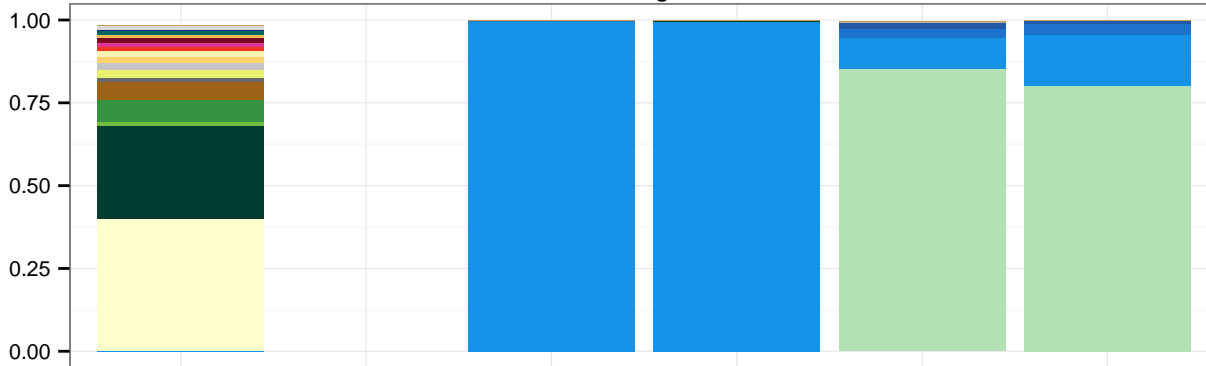

## Girl Vulva

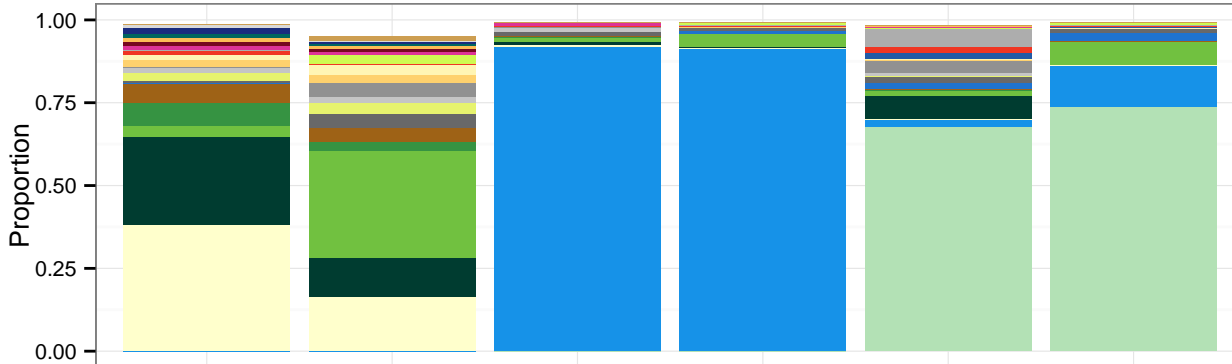

## Mother Vagina

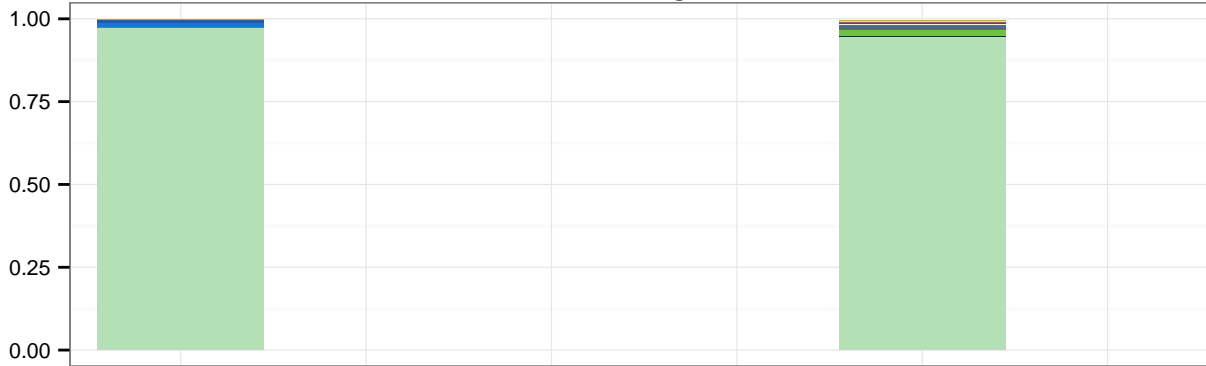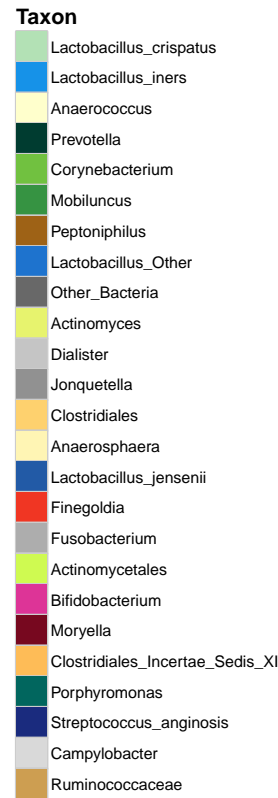

Menarche

**Menarche status**

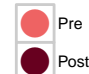

Genital

Breast

**Tanner stage**

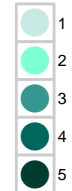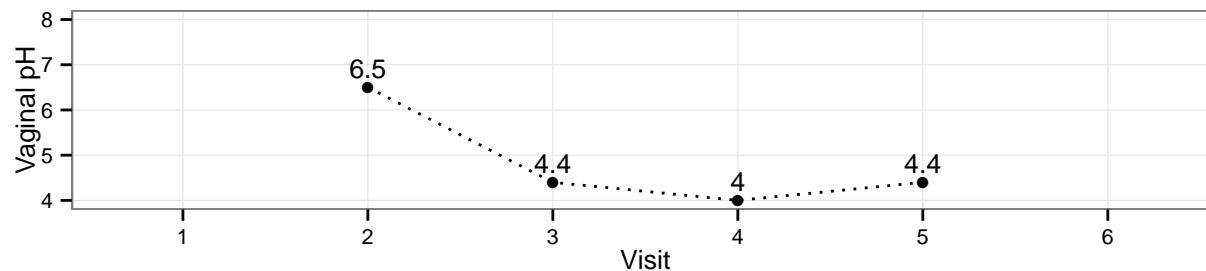

Visit

# Subject 134: Black, non-Hispanic, 10.8 y/o at enrollment

## Girl Vagina

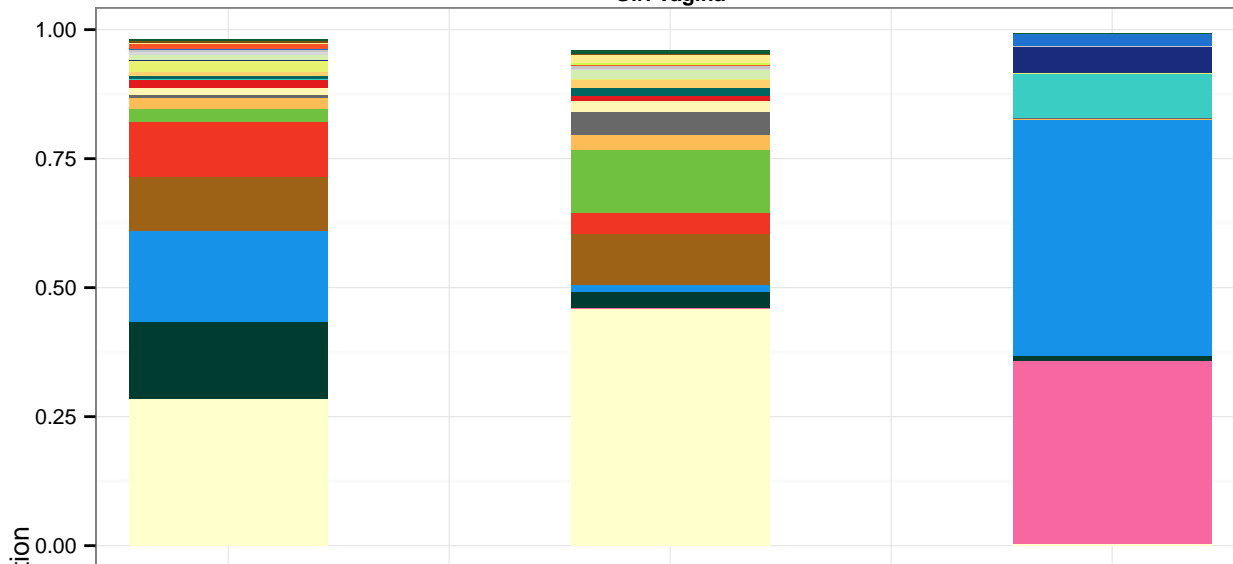

## Girl Vulva

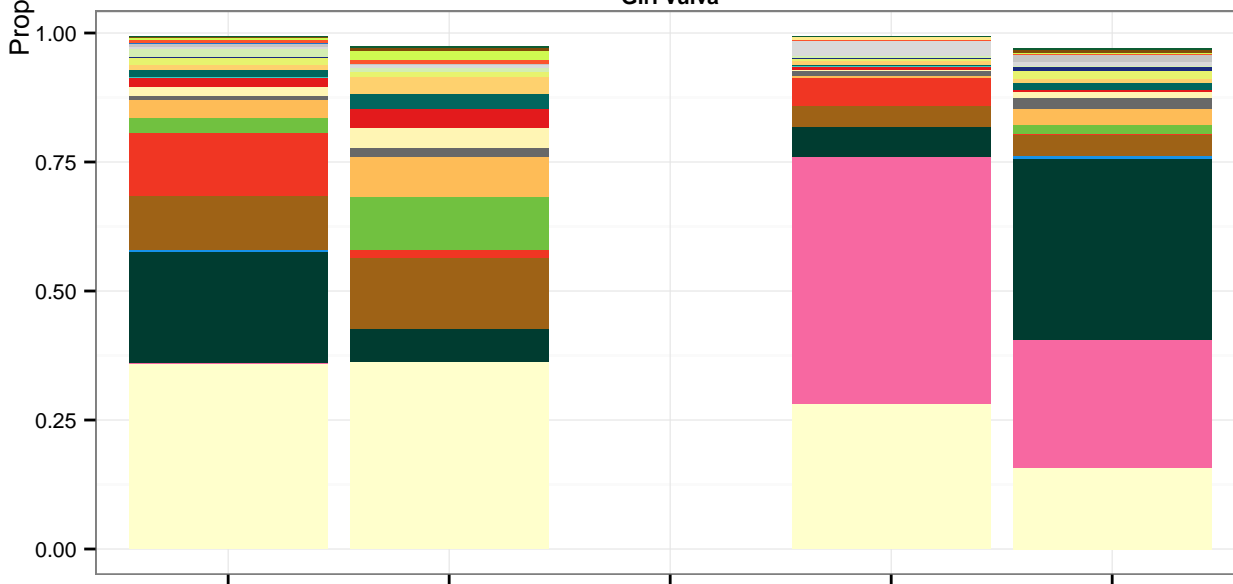

### Taxon

- Anaerococcus
- Alloscardovia
- Prevotella
- Lactobacillus\_iners
- Peptoniphilus
- Finegoldia
- Corynebacterium
- Clostridiales\_Incertae\_Sedis\_XI
- Other\_Bacteria
- Anaerospaera
- Gallicola
- Lactobacillus\_gasseri
- Porphyromonas
- Clostridiales
- Actinomyces
- Streptococcus\_anginosus
- Facklamia
- Campylobacter
- Dialister
- Lactobacillus\_Other
- Fastidiosipila
- Actinomycetales
- Actinobaculum
- Peptococcus
- Segniliparus

### Menarche status

- Pre
- Post

### Tanner stage

- 1
- 2
- 3
- 4
- 5

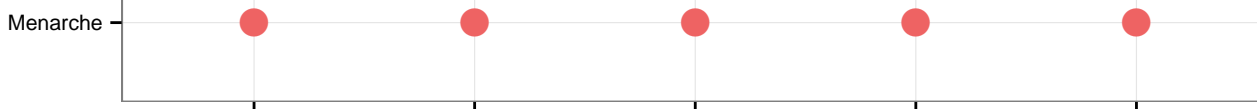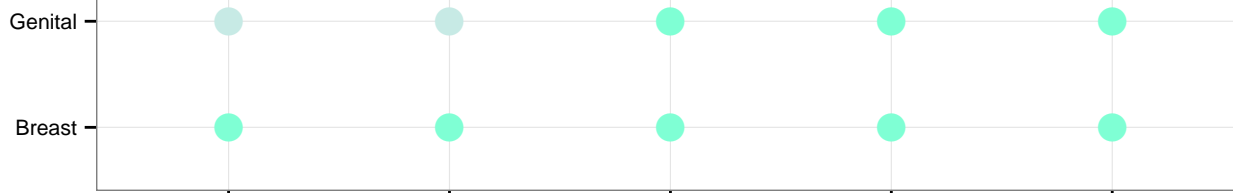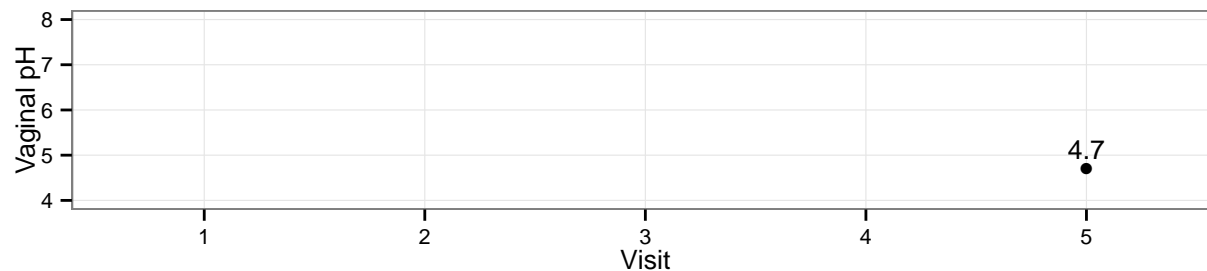

# Subject 135: Black, non-Hispanic, 11.1 y/o at enrollment

## Girl Vagina

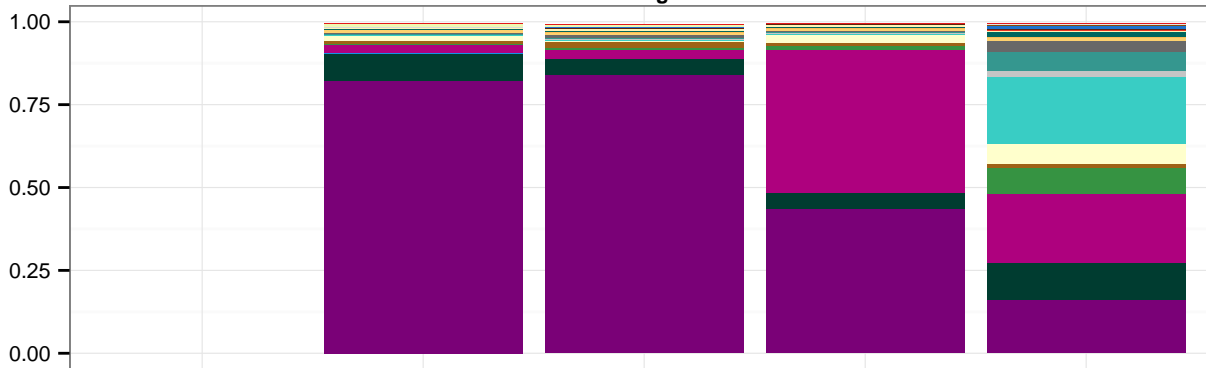

## Girl Vulva

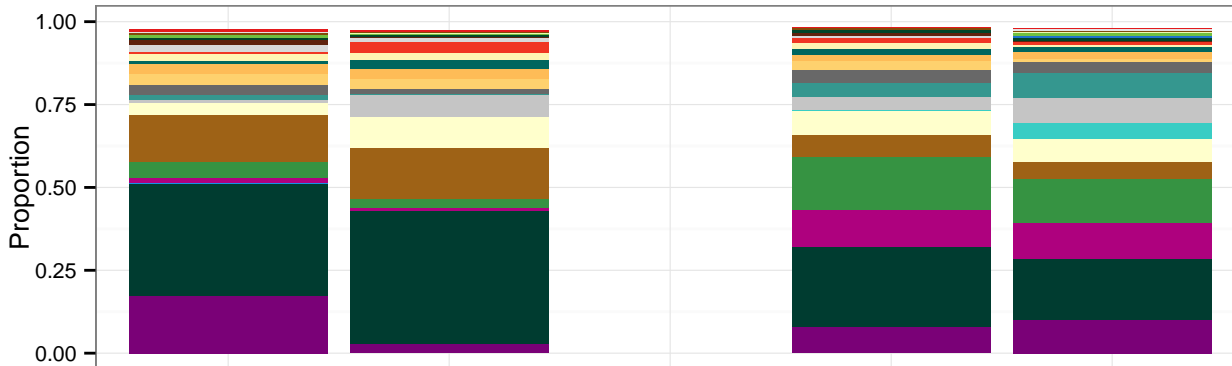

## Mother Vagina

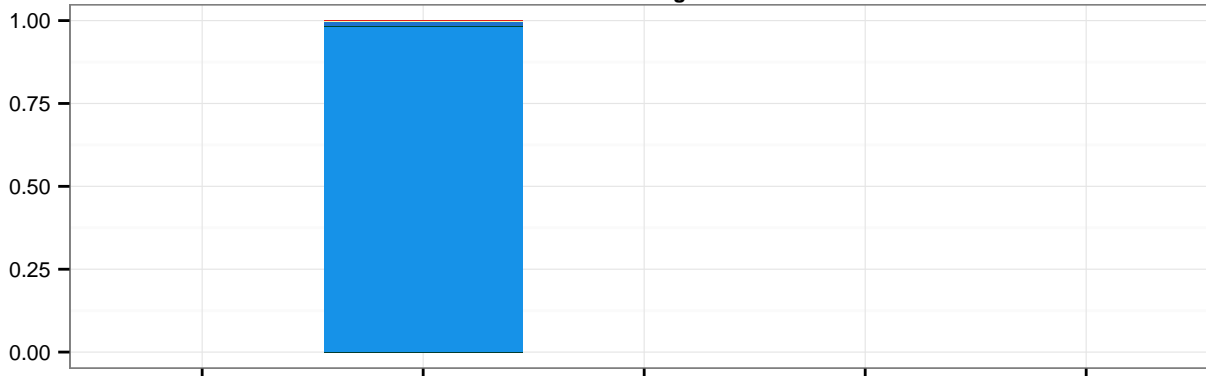

- Taxon**
- Gardnerella\_vaginalis
  - Prevotella
  - Lactobacillus\_iners
  - Gardnerella\_Other
  - Mobiluncus
  - Peptoniphilus
  - Anaerococcus
  - Lactobacillus\_gasseri
  - Dialister
  - Porphyromonadaceae
  - Other\_Bacteria
  - Clostridiales
  - Clostridiales\_Incertae\_Sedis\_XI
  - Porphyromonas
  - Anaerosphaera
  - Finegoldia
  - Campylobacter
  - Murdochella
  - Varibaculum
  - Lactobacillus\_Other
  - Corynebacterium
  - Aerococcus
  - Peptococcus
  - Atopobium
  - Gallicola

Menarche

**Menarche status**

- Pre
- Post

Genital

Breast

**Tanner stage**

- 1
- 2
- 3
- 4
- 5

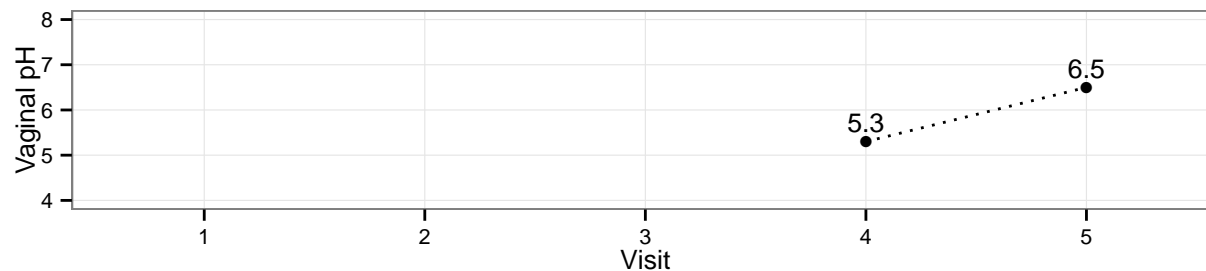

# Subject 136: Black, non-Hispanic, 10.6 y/o at enrollment

## Girl Vagina

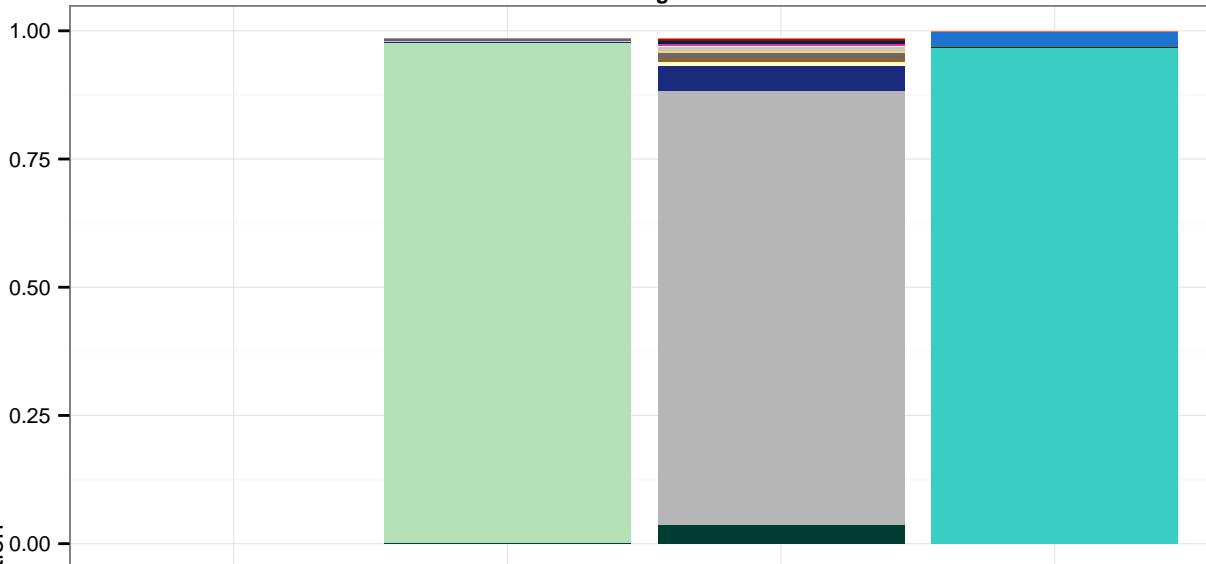

## Girl Vulva

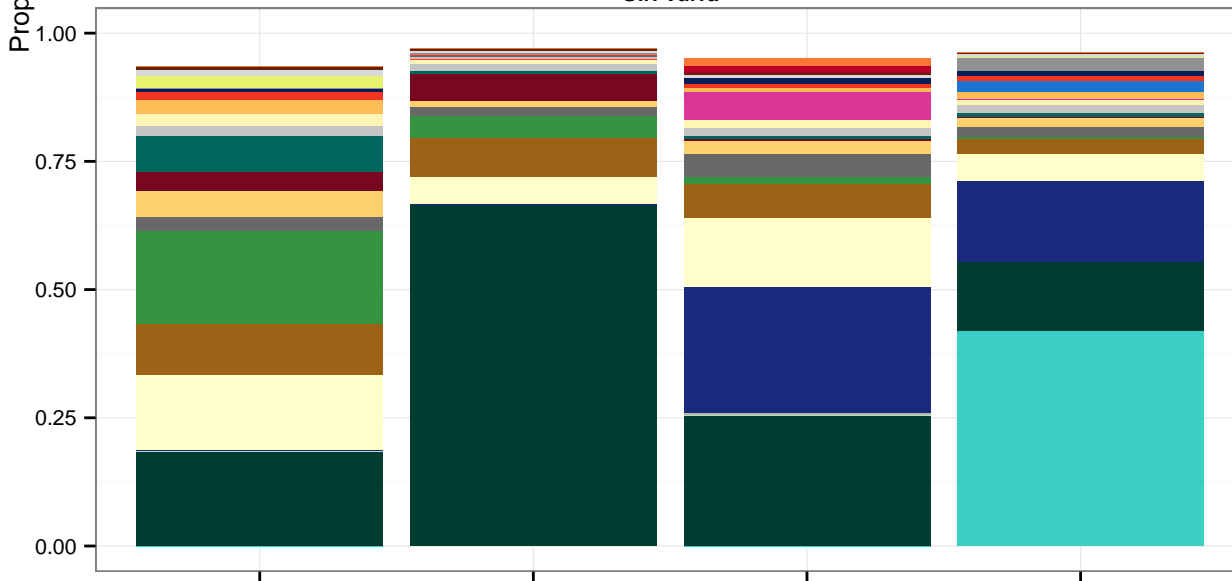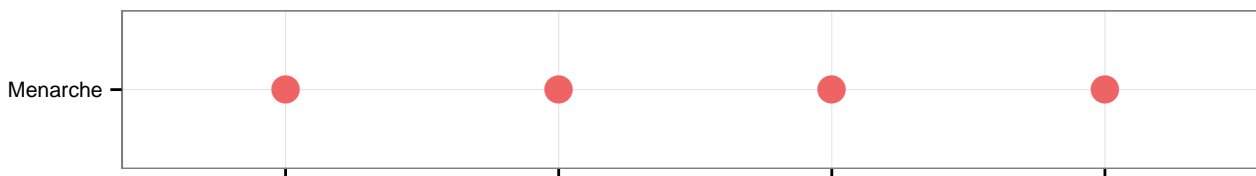

### Menarche status

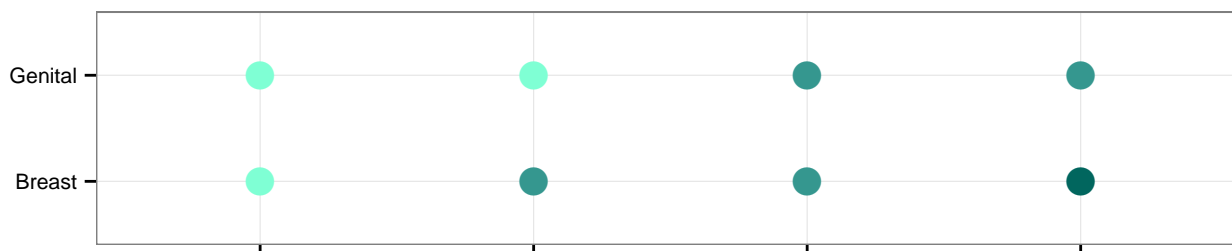

### Tanner stage

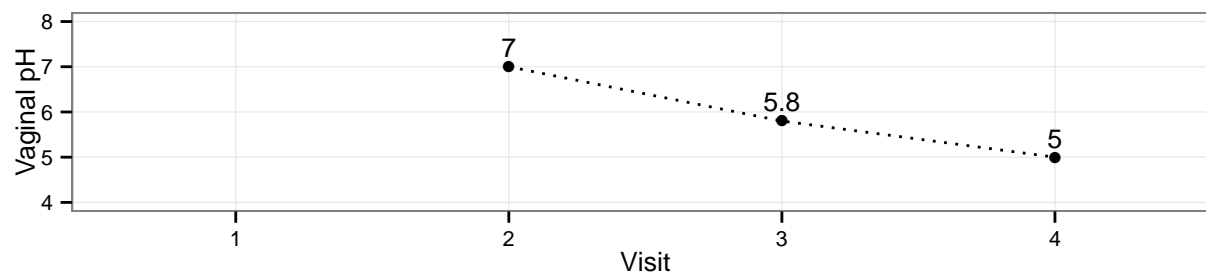

Supplement: mbo002152237sf4.pdf [file mbo002152237sf4.pdf]
