# Supplementary figures and images for: Vaginal Microbiota of Adolescent Girls Prior to the Onset of Menarche Resemble Those of Reproductive-Age Women
Source: PubMed Central journal article supplement — mBio. 2015 Mar 24;6(2):e00097-15. doi: 10.1128/mBio.00097-15 (PMC4453513; doi:10.1128/mbio.00097-15), 2015-03-24

Samples Collected

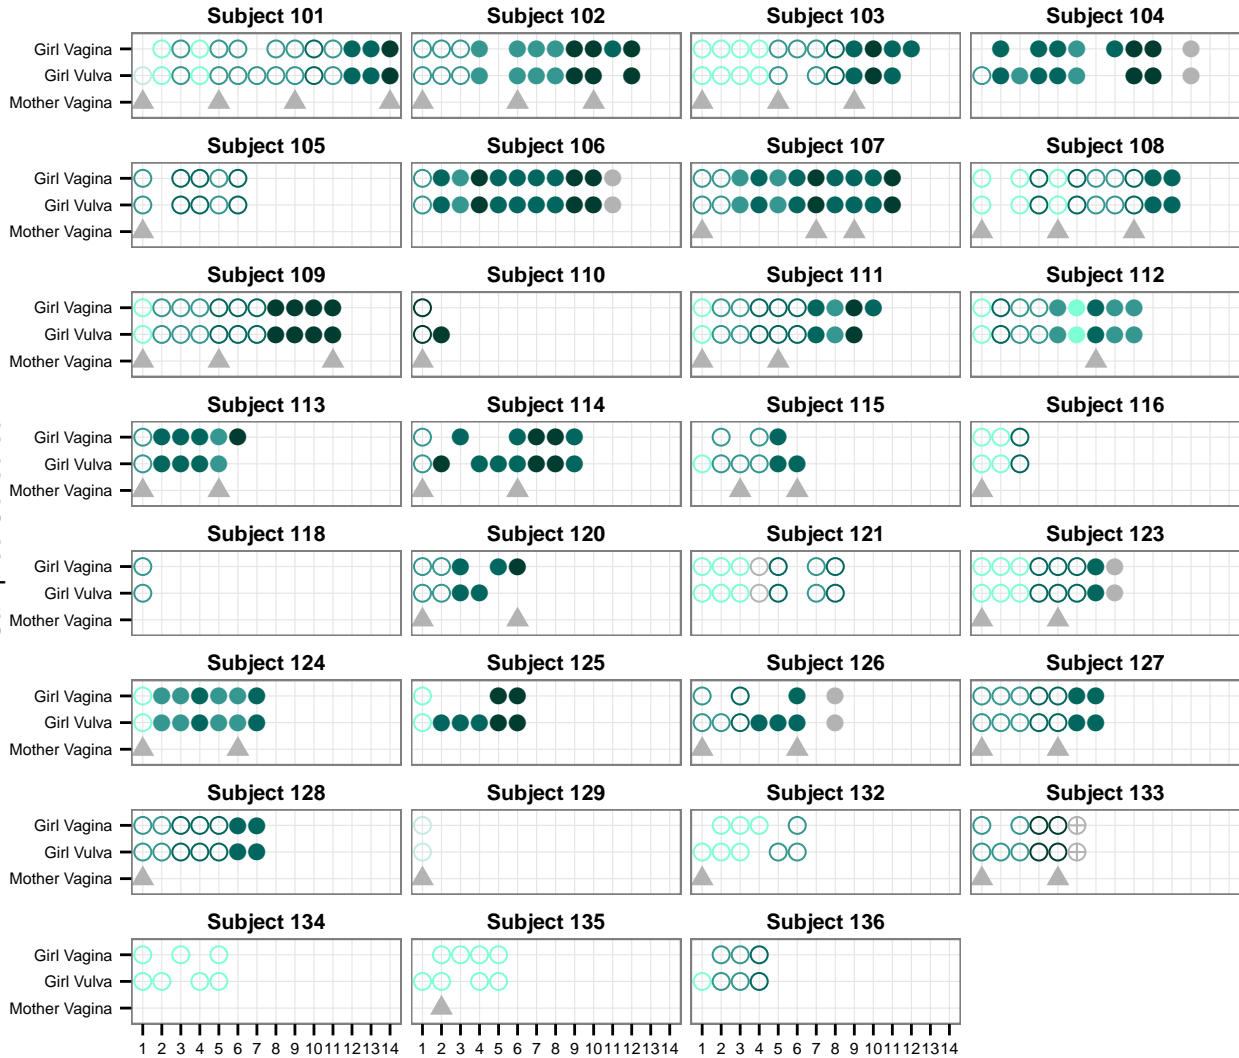

**Tanner Breast**

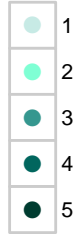

**Sample Type**

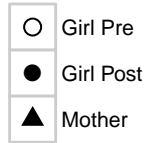

Visit No.

Supplement: mbo002152237sf1.pdf [file mbo002152237sf1.pdf]

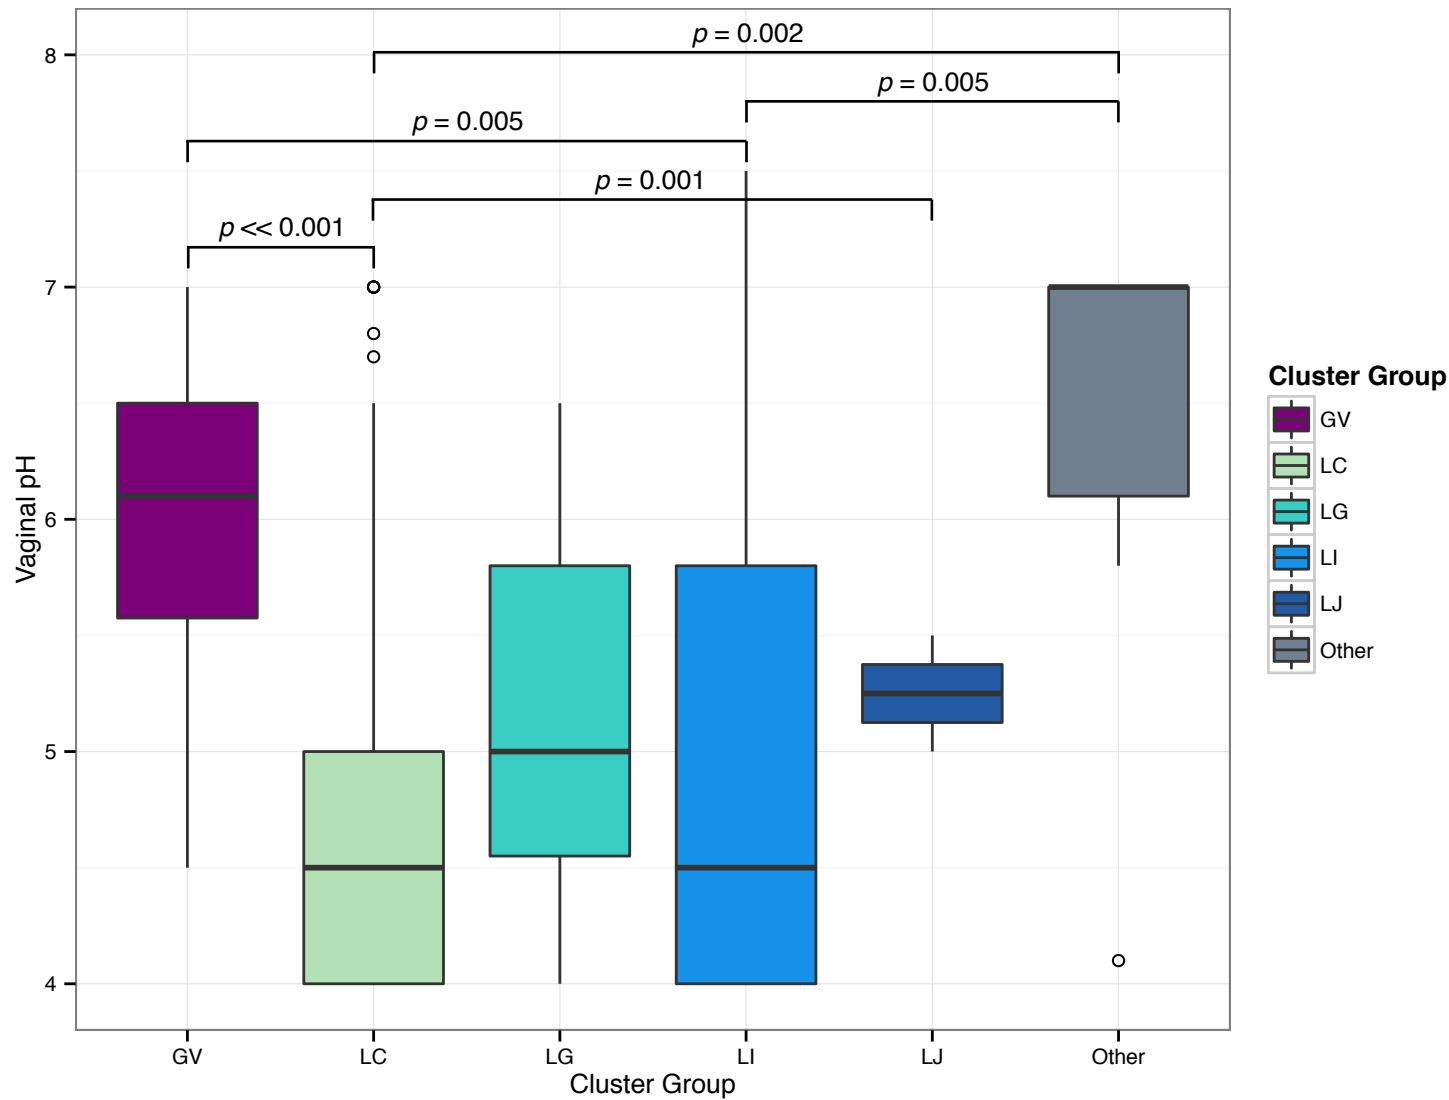

Supplement: mbo002152237sf2.pdf [file mbo002152237sf2.pdf]

**A**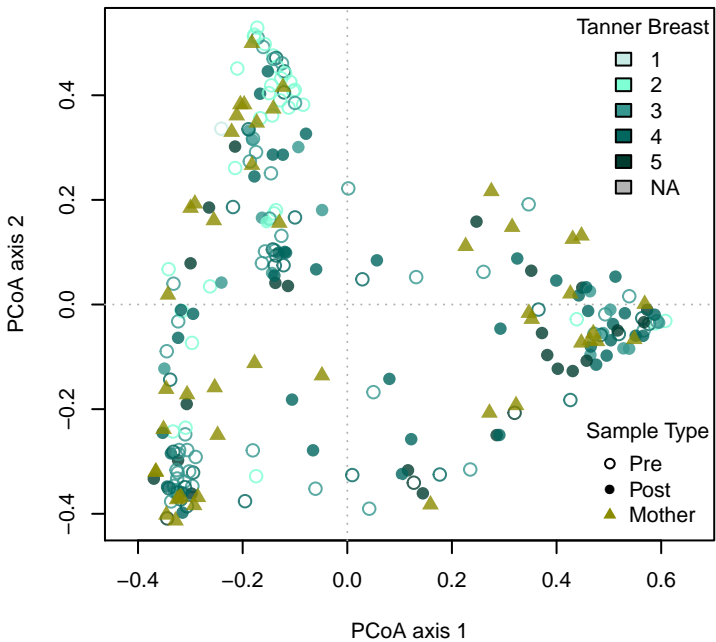**B**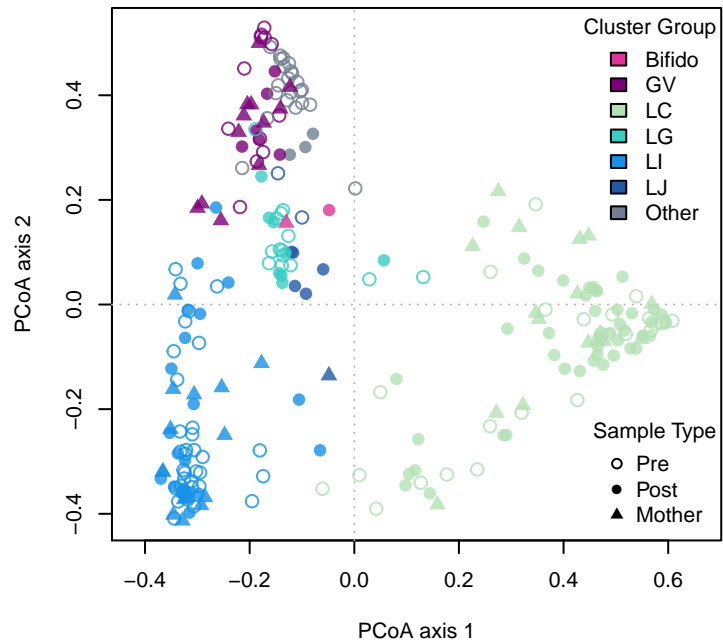

Supplement: mbo002152237sf3.pdf [file mbo002152237sf3.pdf]
